# Supplementary material for: Whitefly Network Analysis Reveals Gene Modules Involved in Host Plant Selection, Development and Evolution
Source: Front Physiol. 2021 Apr 13;12:656649. doi: 10.3389/fphys.2021.656649 (PMC8076899; doi:10.3389/fphys.2021.656649)
Supplement: Supplementary file 3 [file Table_1.xlsx]

## Sheet: Sheet1
SRR4293727	Invertebrate sample from Bemisia tabaci breed B egg stage	Egg
SRR4293726	Invertebrate sample from Bemisia tabaci breed B egg stage	Egg
SRR4293755	Invertebrate sample from Bemisia tabaci breed B egg stage	Egg
SRR4293754	Invertebrate sample from Bemisia tabaci breed B larvae12 stage	BL12
SRR4293728	Invertebrate sample from Bemisia tabaci breed B larvae12 stage	BL12
SRR4293729	Invertebrate sample from Bemisia tabaci breed B larvae12 stage	BL12
SRR4293747	Bemisia tabaci biotypeB larvae3 stage	BL3
SRR4293731	Bemisia tabaci biotypeB larvae3 stage	BL3
SRR4293730	Bemisia tabaci biotypeB larvae3 stage	BL3
SRR4293736	Invertebrate sample from Bemisia tabaci breed B larvae4 stage	BL4
SRR4293733	Invertebrate sample from Bemisia tabaci breed B larvae4 stage	BL4
SRR4293732	Invertebrate sample from Bemisia tabaci breed B larvae4 stage	BL4
SRR4293757	Invertebrate sample from Bemisia tabaci breed B Male stage	BM
SRR4293756	Invertebrate sample from Bemisia tabaci breed B Male stage	BM
SRR4293724	Invertebrate sample from Bemisia tabaci breed B Male stage	BM
SRR4293759	Invertebrate sample from Bemisia tabaci breed B Female stage	BF
SRR4293758	Invertebrate sample from Bemisia tabaci breed B Female stage	BF
SRR4293725	Invertebrate sample from Bemisia tabaci breed B Female stage	BF
SRR6432790	Feeding period of 72 hr on 10% sucrose diet then transferred for pepper	S-pepper
SRR6432798	Feeding period of 72 hr on 10% sucrose diet then transferred for pepper	S-pepper
SRR6432799	Feeding period of 72 hr on 10% sucrose diet then transferred for pepper	S-pepper
SRR6432791	Feeding on pepper	pepper
SRR6432792	Feeding on pepper	pepper
SRR6432793	Feeding on pepper	pepper
SRR6432794	Feeding on kale	kale
SRR6432795	Feeding on kale	kale
SRR6432796	Feeding on kale	kale
SRR6432797	Feeding on eggplant	eggplant
SRR6432816	Feeding on eggplant	eggplant
SRR6432817	Feeding on eggplant	eggplant
SRR6432818	Feeding on cassava	cassava
SRR6432819	Feeding on cassava	cassava
SRR6432821	Feeding on cassava	cassava
