# Supplementary material for: Whitefly Network Analysis Reveals Gene Modules Involved in Host Plant Selection, Development and Evolution
Source: Front Physiol. 2021 Apr 13;12:656649. doi: 10.3389/fphys.2021.656649 (PMC8076899; doi:10.3389/fphys.2021.656649)
Supplement: Supplementary file 4 [file Table_2.xlsx]

## Sheet: midnightblue_GO_KEGG
##Databases: Gene Ontology, KEGG PATHWAY
##Statistical test method: hypergeometric test / Fisher's exact test
##FDR correction method: Benjamini and Hochberg
Term	Database	ID	Input	Total	P-Value	Corrected P-Value	Genes
neuropeptide signaling pathway	Gene Ontology	GO:0007218	7	47	1.19947e-11	1.88317e-09	Bta07819|Bta05477|Bta01267|Bta10738|Bta13512|Bta10647|Bta08926	http://amigo.geneontology.org/amigo/term/GO:0007218
neuropeptide hormone activity	Gene Ontology	GO:0005184	4	27	4.19879e-07	3.29605e-05	Bta13512|Bta07819|Bta08926|Bta10738	http://amigo.geneontology.org/amigo/term/GO:0005184
G protein-coupled receptor signaling pathway	Gene Ontology	GO:0007186	5	104	2.49701e-06	0.000130677	Bta08926|Bta07819|Bta05477|Bta01267|Bta10738	http://amigo.geneontology.org/amigo/term/GO:0007186
G protein-coupled receptor binding	Gene Ontology	GO:0001664	3	29	3.57813e-05	0.00140441	Bta07819|Bta08926|Bta10738	http://amigo.geneontology.org/amigo/term/GO:0001664
body fluid secretion	Gene Ontology	GO:0007589	2	5	8.23489e-05	0.00256059	Bta07819|Bta08926	http://amigo.geneontology.org/amigo/term/GO:0007589
extracellular space	Gene Ontology	GO:0005615	7	544	9.78568e-05	0.00256059	Bta07819|Bta13700|Bta10738|Bta13512|Bta08718|Bta10647|Bta08926	http://amigo.geneontology.org/amigo/term/GO:0005615
carbohydrate metabolic process	Gene Ontology	GO:0005975	3	62	0.000301046	0.00630189	Bta12670|Bta06706|Bta06329	http://amigo.geneontology.org/amigo/term/GO:0005975
G protein-coupled peptide receptor activity	Gene Ontology	GO:0008528	2	14	0.000465225	0.00768846	Bta05477|Bta01267	http://amigo.geneontology.org/amigo/term/GO:0008528
hormone-mediated signaling pathway	Gene Ontology	GO:0009755	2	14	0.000465225	0.00768846	Bta07819|Bta08718	http://amigo.geneontology.org/amigo/term/GO:0009755
Glycosphingolipid biosynthesis - globo and isoglobo series	KEGG PATHWAY	dme00603	2	6	0.000109659	0.00264869	Bta15388|Bta06706	http://www.genome.jp/kegg-bin/show_pathway?dme00603/dme:Dmel_CG17223%09red/dme:Dmel_CG1318%09red

## Sheet: turquoise_GO_KEGG
##Databases: Gene Ontology, KEGG PATHWAY
##Statistical test method: hypergeometric test / Fisher's exact test
##FDR correction method: Benjamini and Hochberg
Term	Database	ID	Input	Total	P-Value	Corrected P-Value	Genes
cytoplasm	Gene Ontology	GO:0005737	405	1386	5.05604e-34	1.34036e-30	Bta09208|Bta00244|Bta09202|Bta13462|Bta07539|Bta06062|Bta11000|Bta02504|Bta02505|Bta07189|Bta06906|Bta05168|Bta04846|Bta03394|Bta15429|Bta11713|Bta10281|Bta14355|Bta12389|Bta14952|Bta10792|Bta15691|Bta14553|Bta01068|Bta12724|Bta15458|Bta01950|Bta06271|Bta00065|Bta10212|Bta15323|Bta15320|Bta09612|Bta09030|Bta06300|Bta08955|Bta03234|Bta00570|Bta08458|Bta04355|Bta09105|Bta08599|Bta03404|Bta04296|Bta…	http://amigo.geneontology.org/amigo/term/GO:0005737
mitochondrion	Gene Ontology	GO:0005739	187	445	4.46749e-30	5.92165e-27	Bta06468|Bta14934|Bta07905|Bta00682|Bta07495|Bta13925|Bta01305|Bta09612|Bta15532|Bta13504|Bta01065|Bta04248|Bta14250|Bta04756|Bta06610|Bta01638|Bta11128|Bta05488|Bta05720|Bta05883|Bta07266|Bta00683|Bta04991|Bta04990|Bta14444|Bta13269|Bta01835|Bta11783|Bta14514|Bta13261|Bta03458|Bta00562|Bta14354|Bta09053|Bta08180|Bta06553|Bta20008|Bta06780|Bta14613|Bta11782|Bta08740|Bta11039|Bta13283|Bta03256|Bta…	http://amigo.geneontology.org/amigo/term/GO:0005739
cytosol	Gene Ontology	GO:0005829	183	547	2.39729e-20	1.15549e-17	Bta12352|Bta11936|Bta06780|Bta09612|Bta00849|Bta15532|Bta14150|Bta05579|Bta05406|Bta06357|Bta02589|Bta04144|Bta03364|Bta09841|Bta11278|Bta13959|Bta12002|Bta09930|Bta14221|Bta02745|Bta08569|Bta07189|Bta03514|Bta12510|Bta02970|Bta14597|Bta04471|Bta11908|Bta20000|Bta09420|Bta03943|Bta01076|Bta13603|Bta07177|Bta09854|Bta15157|Bta06051|Bta09164|Bta12199|Bta04020|Bta06992|Bta05495|Bta07328|Bta03319|Bta…	http://amigo.geneontology.org/amigo/term/GO:0005829
mitochondrial translation	Gene Ontology	GO:0032543	57	73	1.47351e-18	5.20837e-16	Bta08884|Bta12949|Bta07698|Bta11103|Bta05239|Bta01065|Bta01677|Bta06255|Bta14628|Bta00163|Bta04241|Bta11128|Bta11498|Bta00965|Bta09159|Bta00884|Bta14444|Bta09447|Bta11654|Bta13269|Bta02830|Bta09132|Bta08768|Bta09655|Bta08706|Bta12866|Bta04284|Bta12002|Bta09523|Bta20008|Bta06576|Bta08763|Bta08740|Bta13002|Bta01206|Bta10771|Bta13627|Bta11815|Bta01762|Bta14163|Bta06459|Bta00154|Bta06161|Bta14791|Bta…	http://amigo.geneontology.org/amigo/term/GO:0032543
nucleus	Gene Ontology	GO:0005634	399	1709	8.72236e-18	2.56922e-15	Bta13463|Bta13462|Bta00849|Bta06064|Bta06062|Bta13959|Bta14680|Bta11503|Bta13261|Bta06906|Bta15424|Bta12029|Bta03394|Bta00400|Bta12849|Bta15429|Bta10281|Bta07389|Bta10321|Bta11139|Bta08671|Bta06010|Bta08173|Bta00084|Bta10792|Bta07809|Bta15691|Bta08755|Bta15510|Bta02206|Bta12723|Bta06373|Bta15458|Bta01950|Bta10212|Bta15322|Bta03309|Bta11826|Bta09030|Bta14777|Bta12156|Bta04629|Bta00616|Bta00617|Bta…	http://amigo.geneontology.org/amigo/term/GO:0005634
ATP binding	Gene Ontology	GO:0005524	159	512	1.95418e-15	5.18052e-13	Bta12352|Bta14857|Bta06541|Bta04855|Bta00248|Bta15532|Bta13110|Bta06064|Bta12944|Bta02425|Bta15633|Bta11120|Bta04166|Bta03457|Bta08569|Bta12510|Bta08270|Bta01308|Bta11944|Bta04765|Bta15429|Bta07979|Bta06363|Bta14228|Bta01076|Bta06096|Bta02215|Bta13603|Bta02455|Bta03256|Bta08348|Bta09423|Bta06991|Bta00484|Bta04720|Bta04177|Bta15583|Bta00084|Bta12872|Bta10792|Bta02612|Bta10415|Bta07809|Bta15510|Bta…	http://amigo.geneontology.org/amigo/term/GO:0005524
lysosome	Gene Ontology	GO:0005764	38	57	2.27353e-11	4.16217e-09	Bta07770|Bta10291|Bta08697|Bta05424|Bta13175|Bta12884|Bta13153|Bta01771|Bta01772|Bta01773|Bta02427|Bta10706|Bta14781|Bta07699|Bta10546|Bta09612|Bta09676|Bta00531|Bta14884|Bta10997|Bta12823|Bta02560|Bta06903|Bta14359|Bta14718|Bta00171|Bta07153|Bta01769|Bta02183|Bta01920|Bta09833|Bta02023|Bta07152|Bta11133|Bta07566|Bta08055|Bta12469|Bta14624	http://amigo.geneontology.org/amigo/term/GO:0005764
mitochondrial large ribosomal subunit	Gene Ontology	GO:0005762	34	45	2.27655e-11	4.16217e-09	Bta12120|Bta05239|Bta01677|Bta14628|Bta00163|Bta04241|Bta11498|Bta00965|Bta09159|Bta00884|Bta14444|Bta11103|Bta06005|Bta13269|Bta02830|Bta06902|Bta08706|Bta04284|Bta08768|Bta20008|Bta10771|Bta13627|Bta06459|Bta14163|Bta06161|Bta14791|Bta01292|Bta06012|Bta10308|Bta02674|Bta10419|Bta09660|Bta07698|Bta13290	http://amigo.geneontology.org/amigo/term/GO:0005762
nucleolus	Gene Ontology	GO:0005730	64	151	3.0109e-11	4.98868e-09	Bta04628|Bta00576|Bta00571|Bta12708|Bta00835|Bta07920|Bta12393|Bta12648|Bta08928|Bta00283|Bta12214|Bta14853|Bta06606|Bta08803|Bta08307|Bta13870|Bta08048|Bta04206|Bta11250|Bta02787|Bta12396|Bta15034|Bta14566|Bta08582|Bta02740|Bta04062|Bta15165|Bta12199|Bta03989|Bta14193|Bta01839|Bta13097|Bta10211|Bta05041|Bta05046|Bta05109|Bta15161|Bta15784|Bta01256|Bta00513|Bta09214|Bta03022|Bta14391|Bta13282|Bta…	http://amigo.geneontology.org/amigo/term/GO:0005730
vesicle-mediated transport	Gene Ontology	GO:0016192	50	105	1.90728e-10	2.73308e-08	Bta10299|Bta15557|Bta09229|Bta02190|Bta05405|Bta13449|Bta00577|Bta14743|Bta00620|Bta07772|Bta03254|Bta11146|Bta15478|Bta02686|Bta06748|Bta14277|Bta14355|Bta07699|Bta08645|Bta04167|Bta08021|Bta08143|Bta07890|Bta12823|Bta11616|Bta08149|Bta01501|Bta08892|Bta08890|Bta08891|Bta15408|Bta00401|Bta00339|Bta13248|Bta15083|Bta04562|Bta13419|Bta08012|Bta07988|Bta08911|Bta07192|Bta10869|Bta12938|Bta14325|Bta…	http://amigo.geneontology.org/amigo/term/GO:0016192
rRNA processing	Gene Ontology	GO:0006364	25	30	2.49057e-09	3.30125e-07	Bta07809|Bta12359|Bta11767|Bta03011|Bta15165|Bta11250|Bta01839|Bta05109|Bta08183|Bta15784|Bta13126|Bta01071|Bta06096|Bta07889|Bta00835|Bta15720|Bta01647|Bta14534|Bta15481|Bta09874|Bta09708|Bta15583|Bta11814|Bta12872|Bta14877	http://amigo.geneontology.org/amigo/term/GO:0006364
translation	Gene Ontology	GO:0006412	47	108	6.344e-09	7.31215e-07	Bta14558|Bta00835|Bta11103|Bta01065|Bta12949|Bta06255|Bta14628|Bta00163|Bta04241|Bta11498|Bta00965|Bta10462|Bta07698|Bta14444|Bta09447|Bta11654|Bta13269|Bta09132|Bta01839|Bta04284|Bta08768|Bta09523|Bta20008|Bta01051|Bta06576|Bta08763|Bta08740|Bta13002|Bta01206|Bta10771|Bta01762|Bta14163|Bta06459|Bta00154|Bta06161|Bta10712|Bta14791|Bta15027|Bta01292|Bta13591|Bta02674|Bta06811|Bta10419|Bta12866|Bta…	http://amigo.geneontology.org/amigo/term/GO:0006412
cysteine-type endopeptidase activity	Gene Ontology	GO:0004197	22	24	6.93326e-09	7.65836e-07	Bta00576|Bta10291|Bta08697|Bta12884|Bta01771|Bta01772|Bta01773|Bta13959|Bta10546|Bta09612|Bta09676|Bta00531|Bta02560|Bta06903|Bta14718|Bta07152|Bta07153|Bta01769|Bta02183|Bta14359|Bta08055|Bta02287	http://amigo.geneontology.org/amigo/term/GO:0004197
structural constituent of ribosome	Gene Ontology	GO:0003735	51	131	2.75897e-08	2.76001e-06	Bta14558|Bta11103|Bta05239|Bta01065|Bta01677|Bta06255|Bta14628|Bta00163|Bta04241|Bta11498|Bta00965|Bta09159|Bta00884|Bta14444|Bta09447|Bta11654|Bta13269|Bta02830|Bta09132|Bta08706|Bta01839|Bta04284|Bta08768|Bta09523|Bta20008|Bta06576|Bta12949|Bta08763|Bta08740|Bta13002|Bta01206|Bta10771|Bta13627|Bta01762|Bta14163|Bta06459|Bta00154|Bta06161|Bta14791|Bta15027|Bta01292|Bta13591|Bta10308|Bta02674|Bta…	http://amigo.geneontology.org/amigo/term/GO:0003735
small-subunit processome	Gene Ontology	GO:0032040	21	25	4.27086e-08	4.05552e-06	Bta05046|Bta15161|Bta08661|Bta05109|Bta15481|Bta12214|Bta15034|Bta12359|Bta13126|Bta08410|Bta00835|Bta02740|Bta09369|Bta00283|Bta05001|Bta08448|Bta07889|Bta14367|Bta04164|Bta15720|Bta15279	http://amigo.geneontology.org/amigo/term/GO:0032040
endomembrane system	Gene Ontology	GO:0012505	54	146	4.35995e-08	4.05552e-06	Bta09304|Bta09229|Bta14838|Bta05405|Bta07491|Bta06466|Bta03079|Bta13170|Bta14106|Bta03858|Bta13033|Bta00794|Bta03014|Bta08721|Bta09710|Bta06044|Bta06199|Bta06062|Bta07678|Bta02054|Bta06049|Bta06747|Bta08311|Bta03984|Bta09395|Bta01468|Bta02188|Bta09655|Bta10120|Bta12469|Bta04525|Bta01405|Bta01168|Bta09691|Bta14494|Bta05128|Bta07622|Bta06043|Bta13796|Bta05772|Bta09593|Bta08012|Bta14743|Bta06497|Bta…	http://amigo.geneontology.org/amigo/term/GO:0012505
protein binding	Gene Ontology	GO:0005515	163	693	5.99688e-08	5.38906e-06	Bta12352|Bta06544|Bta09202|Bta14150|Bta00411|Bta06357|Bta14325|Bta09177|Bta07266|Bta06190|Bta03457|Bta02745|Bta07189|Bta12510|Bta15424|Bta04846|Bta05047|Bta20009|Bta13459|Bta08468|Bta00079|Bta01076|Bta02215|Bta01023|Bta06292|Bta14354|Bta13964|Bta10153|Bta02943|Bta04478|Bta03463|Bta11131|Bta04720|Bta13350|Bta06256|Bta10792|Bta15473|Bta13331|Bta00576|Bta08755|Bta01732|Bta05058|Bta08198|Bta14743|Bta…	http://amigo.geneontology.org/amigo/term/GO:0005515
mitochondrial small ribosomal subunit	Gene Ontology	GO:0005763	21	26	6.79426e-08	5.67041e-06	Bta09660|Bta09523|Bta14791|Bta15027|Bta06576|Bta13591|Bta08763|Bta14444|Bta09447|Bta08740|Bta11654|Bta01206|Bta13002|Bta09132|Bta01065|Bta12949|Bta06255|Bta01762|Bta00187|Bta12866|Bta00154	http://amigo.geneontology.org/amigo/term/GO:0005763
perivitelline space	Gene Ontology	GO:0098595	18	18	6.85395e-08	5.67041e-06	Bta00531|Bta01773|Bta14718|Bta12884|Bta06407|Bta10546|Bta14359|Bta08697|Bta10291|Bta01769|Bta08055|Bta02183|Bta03774|Bta01771|Bta01772|Bta09676|Bta04949|Bta06725	http://amigo.geneontology.org/amigo/term/GO:0098595
endoplasmic reticulum to Golgi vesicle-mediated transport	Gene Ontology	GO:0006888	29	51	6.95165e-08	5.67041e-06	Bta10299|Bta14838|Bta04796|Bta13170|Bta11146|Bta07262|Bta14135|Bta02500|Bta02054|Bta10566|Bta08312|Bta13545|Bta00196|Bta09426|Bta13714|Bta00401|Bta13248|Bta15083|Bta03148|Bta03257|Bta03251|Bta05991|Bta13419|Bta06183|Bta12938|Bta07930|Bta00221|Bta03404|Bta08094	http://amigo.geneontology.org/amigo/term/GO:0006888
neuron cellular homeostasis	Gene Ontology	GO:0070050	18	19	1.17561e-07	9.30309e-06	Bta09705|Bta13488|Bta00685|Bta00684|Bta05267|Bta13568|Bta14260|Bta06429|Bta14935|Bta11044|Bta04522|Bta04523|Bta07998|Bta14626|Bta09072|Bta07176|Bta11810|Bta02759	http://amigo.geneontology.org/amigo/term/GO:0070050
Golgi apparatus	Gene Ontology	GO:0005794	63	198	3.08797e-07	2.27395e-05	Bta07715|Bta14763|Bta04797|Bta04796|Bta14743|Bta00620|Bta14624|Bta03032|Bta09976|Bta13787|Bta10929|Bta14962|Bta06748|Bta06020|Bta02782|Bta14198|Bta06199|Bta14341|Bta09154|Bta04430|Bta07333|Bta02368|Bta08061|Bta08312|Bta07017|Bta01509|Bta12623|Bta09710|Bta08149|Bta13419|Bta02389|Bta09426|Bta13538|Bta14929|Bta01403|Bta08748|Bta13328|Bta14492|Bta07621|Bta09817|Bta01312|Bta00731|Bta07385|Bta09655|Bta…	http://amigo.geneontology.org/amigo/term/GO:0005794
RNA binding	Gene Ontology	GO:0003723	76	260	3.34822e-07	2.38569e-05	Bta14640|Bta02840|Bta01923|Bta05858|Bta15796|Bta01027|Bta13463|Bta13462|Bta07821|Bta09003|Bta12886|Bta01065|Bta12214|Bta10218|Bta03598|Bta06271|Bta04202|Bta14323|Bta00965|Bta03714|Bta05883|Bta13487|Bta08865|Bta10462|Bta09443|Bta02409|Bta02073|Bta05350|Bta11655|Bta00979|Bta11719|Bta05772|Bta06805|Bta07838|Bta07189|Bta12370|Bta04995|Bta03989|Bta14188|Bta07920|Bta02966|Bta12195|Bta08048|Bta15564|Bta…	http://amigo.geneontology.org/amigo/term/GO:0003723
neuromuscular junction development	Gene Ontology	GO:0007528	23	36	3.4197e-07	2.38569e-05	Bta12545|Bta00684|Bta01027|Bta06429|Bta04522|Bta04523|Bta14626|Bta06725|Bta14568|Bta00685|Bta04995|Bta09655|Bta07998|Bta14260|Bta15046|Bta09072|Bta01098|Bta07176|Bta09705|Bta07988|Bta02966|Bta11810|Bta02759	http://amigo.geneontology.org/amigo/term/GO:0007528
axon extension	Gene Ontology	GO:0048675	19	24	3.5455e-07	2.39397e-05	Bta09705|Bta06300|Bta06170|Bta00685|Bta02012|Bta00684|Bta09072|Bta14260|Bta06429|Bta04167|Bta04522|Bta04523|Bta15478|Bta10317|Bta07998|Bta14626|Bta07176|Bta11810|Bta02759	http://amigo.geneontology.org/amigo/term/GO:0048675
fusome	Gene Ontology	GO:0045169	22	33	3.61218e-07	2.39397e-05	Bta08885|Bta00531|Bta08415|Bta05579|Bta07621|Bta02984|Bta09823|Bta07538|Bta09612|Bta09676|Bta02560|Bta04521|Bta00079|Bta02183|Bta00635|Bta13941|Bta01740|Bta04720|Bta08153|Bta08055|Bta01696|Bta10792	http://amigo.geneontology.org/amigo/term/GO:0045169
endoplasmic reticulum	Gene Ontology	GO:0005783	66	214	4.12368e-07	2.66631e-05	Bta10299|Bta13690|Bta15557|Bta09304|Bta07715|Bta02193|Bta12032|Bta07491|Bta04796|Bta14743|Bta13170|Bta14106|Bta05579|Bta07389|Bta02881|Bta04525|Bta02984|Bta03014|Bta05704|Bta06062|Bta04038|Bta14135|Bta14341|Bta13488|Bta12291|Bta03340|Bta06843|Bta13534|Bta09655|Bta08538|Bta13288|Bta09794|Bta11514|Bta01405|Bta14198|Bta09654|Bta05128|Bta14671|Bta10294|Bta02991|Bta03148|Bta09817|Bta13412|Bta09003|Bta…	http://amigo.geneontology.org/amigo/term/GO:0005783
positive regulation of synaptic growth at neuromuscular junction	Gene Ontology	GO:0045887	21	31	5.4895e-07	3.46492e-05	Bta09705|Bta14260|Bta13964|Bta14004|Bta00685|Bta00684|Bta09072|Bta12637|Bta01027|Bta06429|Bta04995|Bta04522|Bta04523|Bta07998|Bta14626|Bta00507|Bta09499|Bta07176|Bta11810|Bta14947|Bta02759	http://amigo.geneontology.org/amigo/term/GO:0045887
positive regulation of proteasomal ubiquitin-dependent protein catabolic process	Gene Ontology	GO:0032436	19	27	1.25711e-06	7.5741e-05	Bta14796|Bta08755|Bta00570|Bta07274|Bta04720|Bta14995|Bta14333|Bta01022|Bta08558|Bta15240|Bta02206|Bta03258|Bta12857|Bta06357|Bta10792|Bta08396|Bta03320|Bta02540|Bta00288	http://amigo.geneontology.org/amigo/term/GO:0032436
endosomal transport	Gene Ontology	GO:0016197	17	23	2.83369e-06	0.000161551	Bta14354|Bta04567|Bta02902|Bta01542|Bta07699|Bta10610|Bta01703|Bta09410|Bta13340|Bta13175|Bta10654|Bta07770|Bta12823|Bta08447|Bta04588|Bta03727|Bta02916	http://amigo.geneontology.org/amigo/term/GO:0016197
intracellular protein transport	Gene Ontology	GO:0006886	38	101	2.99141e-06	0.000166952	Bta15434|Bta09229|Bta02190|Bta05399|Bta13449|Bta12627|Bta04796|Bta14743|Bta13175|Bta05405|Bta06748|Bta07262|Bta04562|Bta14135|Bta14355|Bta07699|Bta04208|Bta11616|Bta02389|Bta02916|Bta02192|Bta15408|Bta09499|Bta13102|Bta12067|Bta11422|Bta04430|Bta03727|Bta08012|Bta14535|Bta06183|Bta10869|Bta10610|Bta14418|Bta12469|Bta09787|Bta03404|Bta08094	http://amigo.geneontology.org/amigo/term/GO:0006886
peptidase activity	Gene Ontology	GO:0008233	14	15	3.4216e-06	0.000187024	Bta11877|Bta14718|Bta10291|Bta10546|Bta14359|Bta08697|Bta09612|Bta01769|Bta01852|Bta12884|Bta02560|Bta01771|Bta01772|Bta01773	http://amigo.geneontology.org/amigo/term/GO:0008233
DNA helicase activity	Gene Ontology	GO:0003678	15	18	3.9475e-06	0.000211411	Bta04765|Bta08533|Bta06008|Bta01308|Bta12534|Bta00738|Bta15429|Bta00188|Bta11820|Bta01732|Bta11606|Bta07189|Bta02308|Bta06155|Bta13370	http://amigo.geneontology.org/amigo/term/GO:0003678
nucleic acid binding	Gene Ontology	GO:0003676	54	177	5.82209e-06	0.000302635	Bta08519|Bta00571|Bta02099|Bta01004|Bta11857|Bta08758|Bta00689|Bta14935|Bta08008|Bta05031|Bta10800|Bta12142|Bta05665|Bta06335|Bta07470|Bta04200|Bta02360|Bta14300|Bta04166|Bta05515|Bta13587|Bta02524|Bta08314|Bta12699|Bta03530|Bta01506|Bta04102|Bta14914|Bta08183|Bta13737|Bta05065|Bta15688|Bta13473|Bta00979|Bta05638|Bta06096|Bta08563|Bta03127|Bta14777|Bta03743|Bta03929|Bta01902|Bta06220|Bta05201|Bta…	http://amigo.geneontology.org/amigo/term/GO:0003676
preribosome, large subunit precursor	Gene Ontology	GO:0030687	15	19	6.23247e-06	0.00031471	Bta13870|Bta07809|Bta15626|Bta01256|Bta00689|Bta12393|Bta14251|Bta15157|Bta12199|Bta11814|Bta08307|Bta06606|Bta12159|Bta01839|Bta12940	http://amigo.geneontology.org/amigo/term/GO:0030687
protein ubiquitination	Gene Ontology	GO:0016567	35	94	8.67717e-06	0.000429966	Bta13707|Bta12545|Bta01022|Bta02887|Bta13978|Bta15240|Bta02881|Bta06357|Bta03135|Bta02035|Bta06190|Bta14565|Bta00090|Bta04347|Bta11804|Bta13350|Bta06605|Bta15680|Bta01039|Bta01072|Bta00395|Bta03258|Bta10692|Bta13827|Bta07389|Bta02020|Bta11687|Bta10153|Bta07468|Bta14333|Bta08205|Bta10654|Bta06384|Bta05424|Bta01098	http://amigo.geneontology.org/amigo/term/GO:0016567
P granule	Gene Ontology	GO:0043186	19	33	1.08031e-05	0.000519438	Bta04659|Bta12254|Bta03359|Bta04720|Bta11131|Bta09089|Bta09612|Bta09003|Bta13311|Bta11719|Bta11130|Bta03761|Bta02984|Bta07189|Bta02560|Bta01204|Bta09347|Bta06071|Bta08710	http://amigo.geneontology.org/amigo/term/GO:0043186
single-stranded RNA binding	Gene Ontology	GO:0003727	12	12	1.09727e-05	0.000519438	Bta00875|Bta03463|Bta05263|Bta08817|Bta01648|Bta12886|Bta12142|Bta02454|Bta11702|Bta13833|Bta04116|Bta12751	http://amigo.geneontology.org/amigo/term/GO:0003727
ubiquitin-protein transferase activity	Gene Ontology	GO:0004842	34	92	1.31586e-05	0.000601439	Bta00570|Bta12545|Bta08538|Bta08558|Bta13978|Bta02881|Bta06357|Bta03135|Bta03320|Bta13529|Bta03342|Bta06190|Bta14565|Bta00090|Bta04347|Bta00288|Bta12708|Bta15680|Bta13707|Bta13923|Bta03761|Bta01098|Bta07389|Bta06071|Bta11687|Bta08131|Bta14333|Bta04054|Bta08205|Bta13350|Bta00395|Bta11839|Bta06384|Bta05424	http://amigo.geneontology.org/amigo/term/GO:0004842
presynaptic membrane	Gene Ontology	GO:0042734	15	21	1.45586e-05	0.000654151	Bta09705|Bta14260|Bta06450|Bta00685|Bta00684|Bta09072|Bta06429|Bta04522|Bta04523|Bta09994|Bta07998|Bta14626|Bta07176|Bta11810|Bta02759	http://amigo.geneontology.org/amigo/term/GO:0042734
terminal bouton	Gene Ontology	GO:0043195	20	38	1.73347e-05	0.000747504	Bta09705|Bta04522|Bta08016|Bta06450|Bta00685|Bta00684|Bta05267|Bta14260|Bta06429|Bta14063|Bta02524|Bta04523|Bta07998|Bta14626|Bta09072|Bta14004|Bta07176|Bta11810|Bta00263|Bta02759	http://amigo.geneontology.org/amigo/term/GO:0043195
signal transduction	Gene Ontology	GO:0007165	32	85	1.73412e-05	0.000747504	Bta14626|Bta00685|Bta00684|Bta06429|Bta07823|Bta04522|Bta04523|Bta14150|Bta04521|Bta00047|Bta09823|Bta06170|Bta09243|Bta10371|Bta04123|Bta07998|Bta14260|Bta04855|Bta09072|Bta08468|Bta01740|Bta12495|Bta07176|Bta00635|Bta09705|Bta13941|Bta00850|Bta14895|Bta01696|Bta10792|Bta11810|Bta02759	http://amigo.geneontology.org/amigo/term/GO:0007165
neuromuscular junction	Gene Ontology	GO:0031594	24	53	1.84757e-05	0.00076665	Bta00685|Bta00684|Bta01027|Bta06429|Bta04522|Bta04523|Bta13394|Bta14626|Bta06725|Bta04995|Bta11552|Bta07998|Bta14260|Bta09072|Bta12637|Bta07176|Bta10792|Bta09705|Bta07988|Bta14004|Bta06811|Bta00263|Bta11810|Bta02759	http://amigo.geneontology.org/amigo/term/GO:0031594
mitochondrial matrix	Gene Ontology	GO:0005759	24	53	1.84757e-05	0.00076665	Bta06424|Bta08418|Bta11857|Bta10904|Bta07774|Bta12720|Bta13833|Bta04180|Bta10214|Bta03716|Bta13583|Bta03201|Bta03791|Bta06553|Bta15564|Bta10811|Bta15088|Bta04471|Bta15042|Bta00954|Bta05500|Bta02757|Bta11606|Bta11815	http://amigo.geneontology.org/amigo/term/GO:0005759
DNA-dependent ATPase activity	Gene Ontology	GO:0008094	12	13	1.86529e-05	0.00076665	Bta01308|Bta08533|Bta06008|Bta00301|Bta15429|Bta00188|Bta01732|Bta13110|Bta02308|Bta13370|Bta09010|Bta01984	http://amigo.geneontology.org/amigo/term/GO:0008094
DNA-directed 5'-3' RNA polymerase activity	Gene Ontology	GO:0003899	13	16	2.10698e-05	0.00083994	Bta13445|Bta14406|Bta08658|Bta02099|Bta02688|Bta01835|Bta14536|Bta01897|Bta11752|Bta01794|Bta11702|Bta15611|Bta07865	http://amigo.geneontology.org/amigo/term/GO:0003899
endoplasmic reticulum organization	Gene Ontology	GO:0007029	13	16	2.10698e-05	0.00083994	Bta13690|Bta14135|Bta06946|Bta14838|Bta02054|Bta01022|Bta04720|Bta05579|Bta03258|Bta09655|Bta06183|Bta02984|Bta11422	http://amigo.geneontology.org/amigo/term/GO:0007029
retrograde transport, endosome to Golgi	Gene Ontology	GO:0042147	16	26	2.91305e-05	0.0011192	Bta14535|Bta07400|Bta06777|Bta05540|Bta13665|Bta12623|Bta08061|Bta12938|Bta13787|Bta11827|Bta00221|Bta04797|Bta12469|Bta09787|Bta03972|Bta13419	http://amigo.geneontology.org/amigo/term/GO:0042147
dsRNA transport	Gene Ontology	GO:0033227	15	23	3.151e-05	0.0011798	Bta06748|Bta05395|Bta15238|Bta13545|Bta11647|Bta08415|Bta12021|Bta14418|Bta11616|Bta11142|Bta12886|Bta12823|Bta13214|Bta09114|Bta14037	http://amigo.geneontology.org/amigo/term/GO:0033227
protein localization to plasma membrane	Gene Ontology	GO:0072659	18	33	3.15979e-05	0.0011798	Bta13941|Bta11422|Bta14135|Bta04827|Bta00620|Bta01740|Bta08143|Bta08021|Bta04167|Bta00079|Bta04521|Bta07772|Bta01696|Bta03254|Bta00635|Bta07361|Bta15478|Bta09823	http://amigo.geneontology.org/amigo/term/GO:0072659
endocytic recycling	Gene Ontology	GO:0032456	14	20	3.29394e-05	0.00121281	Bta00577|Bta07400|Bta14168|Bta05405|Bta08021|Bta00079|Bta08061|Bta08143|Bta04580|Bta03254|Bta07772|Bta11897|Bta13787|Bta03727	http://amigo.geneontology.org/amigo/term/GO:0032456
microtubule cytoskeleton organization	Gene Ontology	GO:0000226	25	60	3.75732e-05	0.00134604	Bta00685|Bta00684|Bta06429|Bta01060|Bta04523|Bta14626|Bta12311|Bta02984|Bta01285|Bta14260|Bta06805|Bta07998|Bta09705|Bta04846|Bta09072|Bta07176|Bta04522|Bta09873|Bta07109|Bta14004|Bta04720|Bta08227|Bta06016|Bta11810|Bta02759	http://amigo.geneontology.org/amigo/term/GO:0000226
oxidation-reduction process	Gene Ontology	GO:0055114	70	274	4.32334e-05	0.00151477	Bta00306|Bta00682|Bta08779|Bta06426|Bta07905|Bta11324|Bta14930|Bta04690|Bta03382|Bta05177|Bta07774|Bta13504|Bta03852|Bta12338|Bta07651|Bta15108|Bta09971|Bta06335|Bta01329|Bta02440|Bta02505|Bta09710|Bta06044|Bta00962|Bta08660|Bta11292|Bta10725|Bta04991|Bta11854|Bta09886|Bta06049|Bta06048|Bta02520|Bta08703|Bta02816|Bta14321|Bta09053|Bta14494|Bta00072|Bta14841|Bta10913|Bta10911|Bta20000|Bta00034|Bta…	http://amigo.geneontology.org/amigo/term/GO:0055114
tRNA binding	Gene Ontology	GO:0000049	15	24	4.51969e-05	0.00154603	Bta08048|Bta03364|Bta03171|Bta01305|Bta08207|Bta15532|Bta09798|Bta01902|Bta03259|Bta11944|Bta02241|Bta00398|Bta03256|Bta06335|Bta09797	http://amigo.geneontology.org/amigo/term/GO:0000049
membrane	Gene Ontology	GO:0016020	71	280	4.67338e-05	0.00157823	Bta13690|Bta10706|Bta07651|Bta09304|Bta12623|Bta01946|Bta08987|Bta12032|Bta05375|Bta00149|Bta09979|Bta07772|Bta09829|Bta00047|Bta03254|Bta11142|Bta14250|Bta04918|Bta10967|Bta05704|Bta01638|Bta06668|Bta05351|Bta06236|Bta11000|Bta09154|Bta09819|Bta03340|Bta04481|Bta15653|Bta04994|Bta03457|Bta11228|Bta05772|Bta09655|Bta09654|Bta08149|Bta10644|Bta12376|Bta04120|Bta09427|Bta09250|Bta06003|Bta01019|Bta…	http://amigo.geneontology.org/amigo/term/GO:0016020
protein kinase binding	Gene Ontology	GO:0019901	22	50	5.70398e-05	0.00180676	Bta13567|Bta13568|Bta00507|Bta14150|Bta15478|Bta12647|Bta06170|Bta13876|Bta04167|Bta12510|Bta12854|Bta12554|Bta05106|Bta08468|Bta03800|Bta03869|Bta00975|Bta10953|Bta05240|Bta06181|Bta10574|Bta12689	http://amigo.geneontology.org/amigo/term/GO:0019901
ubiquitin-dependent protein catabolic process	Gene Ontology	GO:0006511	35	105	5.71216e-05	0.00180676	Bta00576|Bta00570|Bta12545|Bta08538|Bta01022|Bta08558|Bta02887|Bta05406|Bta13394|Bta06357|Bta03320|Bta08396|Bta08664|Bta14327|Bta09715|Bta13959|Bta07333|Bta01998|Bta00090|Bta09116|Bta00288|Bta13529|Bta13539|Bta13105|Bta03258|Bta13827|Bta11015|Bta10153|Bta04720|Bta00488|Bta14333|Bta01793|Bta10654|Bta02287|Bta01098	http://amigo.geneontology.org/amigo/term/GO:0006511
carbohydrate metabolic process	Gene Ontology	GO:0005975	25	62	5.75901e-05	0.00180676	Bta11854|Bta15610|Bta04421|Bta12809|Bta06199|Bta04732|Bta04731|Bta04306|Bta03309|Bta03439|Bta15683|Bta07764|Bta08425|Bta12671|Bta12578|Bta10019|Bta12678|Bta10320|Bta05340|Bta14419|Bta13237|Bta04591|Bta01478|Bta11542|Bta04339	http://amigo.geneontology.org/amigo/term/GO:0005975
calcium ion binding	Gene Ontology	GO:0005509	46	157	6.24726e-05	0.00193702	Bta02902|Bta00685|Bta00684|Bta06429|Bta04522|Bta04523|Bta14626|Bta05704|Bta12646|Bta12195|Bta04567|Bta14134|Bta15052|Bta02051|Bta04731|Bta03340|Bta07333|Bta07500|Bta13676|Bta06062|Bta06199|Bta07998|Bta05814|Bta14260|Bta01405|Bta14597|Bta09072|Bta07935|Bta04807|Bta01219|Bta11461|Bta03027|Bta05631|Bta09158|Bta03125|Bta14148|Bta09705|Bta01201|Bta09125|Bta06754|Bta10652|Bta07176|Bta13237|Bta04732|Bta…	http://amigo.geneontology.org/amigo/term/GO:0005509
late endosome membrane	Gene Ontology	GO:0031902	13	19	7.44099e-05	0.00226737	Bta03149|Bta05361|Bta02606|Bta07566|Bta12938|Bta00171|Bta00221|Bta12823|Bta01128|Bta09787|Bta09833|Bta14778|Bta13419	http://amigo.geneontology.org/amigo/term/GO:0031902
synaptic target recognition	Gene Ontology	GO:0008039	16	29	7.7714e-05	0.00233066	Bta09705|Bta14260|Bta00685|Bta00684|Bta09154|Bta09072|Bta09841|Bta06429|Bta08506|Bta04522|Bta04523|Bta07998|Bta14626|Bta07176|Bta11810|Bta02759	http://amigo.geneontology.org/amigo/term/GO:0008039
endoplasmic reticulum membrane	Gene Ontology	GO:0005789	33	98	7.82455e-05	0.00233066	Bta10299|Bta13690|Bta07651|Bta14838|Bta12376|Bta10294|Bta11080|Bta03079|Bta02881|Bta11427|Bta07389|Bta10120|Bta07002|Bta11514|Bta02054|Bta01468|Bta05772|Bta02188|Bta02968|Bta06946|Bta11887|Bta05002|Bta00397|Bta00196|Bta03257|Bta08933|Bta13419|Bta06301|Bta09458|Bta12938|Bta04038|Bta00221|Bta03509	http://amigo.geneontology.org/amigo/term/GO:0005789
RNA polymerase I complex	Gene Ontology	GO:0005736	10	11	0.000102748	0.0029769	Bta13445|Bta14406|Bta02099|Bta14536|Bta07390|Bta02688|Bta01897|Bta11752|Bta01794|Bta15611	http://amigo.geneontology.org/amigo/term/GO:0005736
SNAP receptor activity	Gene Ontology	GO:0005484	13	20	0.000108514	0.00304413	Bta10299|Bta07988|Bta00401|Bta15587|Bta08645|Bta12938|Bta06466|Bta15083|Bta08312|Bta00221|Bta08012|Bta08094|Bta13419	http://amigo.geneontology.org/amigo/term/GO:0005484
short-term memory	Gene Ontology	GO:0007614	13	20	0.000108514	0.00304413	Bta09705|Bta14260|Bta00685|Bta00684|Bta09072|Bta06429|Bta04522|Bta04523|Bta07998|Bta14626|Bta07176|Bta11810|Bta02759	http://amigo.geneontology.org/amigo/term/GO:0007614
endocytosis	Gene Ontology	GO:0006897	21	49	0.000111949	0.00307843	Bta04567|Bta02782|Bta02902|Bta01501|Bta14535|Bta07699|Bta08855|Bta10869|Bta04167|Bta03457|Bta00079|Bta11616|Bta04580|Bta15478|Bta00047|Bta12823|Bta09837|Bta02023|Bta12942|Bta03727|Bta02916	http://amigo.geneontology.org/amigo/term/GO:0006897
neurogenesis	Gene Ontology	GO:0022008	11	14	0.00011287	0.00307843	Bta12708|Bta11936|Bta07468|Bta07533|Bta07575|Bta14925|Bta11335|Bta11527|Bta05682|Bta13385|Bta00956	http://amigo.geneontology.org/amigo/term/GO:0022008
maturation of SSU-rRNA from tricistronic rRNA transcript (SSU-rRNA, 5.8S rRNA, LSU-rRNA)	Gene Ontology	GO:0000462	12	17	0.000113801	0.00307843	Bta15161|Bta08661|Bta07498|Bta15034|Bta05001|Bta08410|Bta09874|Bta00283|Bta09369|Bta06255|Bta05598|Bta14367	http://amigo.geneontology.org/amigo/term/GO:0000462
RNA polymerase I activity	Gene Ontology	GO:0001054	9	9	0.000143829	0.00383206	Bta13445|Bta14536|Bta02099|Bta07390|Bta02688|Bta01897|Bta11752|Bta01794|Bta15611	http://amigo.geneontology.org/amigo/term/GO:0001054
Rab GTPase binding	Gene Ontology	GO:0017137	23	59	0.000167565	0.004256	Bta01003|Bta05399|Bta12627|Bta04797|Bta07400|Bta04562|Bta00852|Bta08021|Bta09134|Bta04580|Bta01509|Bta08149|Bta09817|Bta04783|Bta13102|Bta12067|Bta03254|Bta00055|Bta04430|Bta07017|Bta06777|Bta14330|Bta10436	http://amigo.geneontology.org/amigo/term/GO:0017137
endosome	Gene Ontology	GO:0005768	23	59	0.000167565	0.004256	Bta00149|Bta11897|Bta14624|Bta15124|Bta03136|Bta10967|Bta02782|Bta03715|Bta11827|Bta02368|Bta13340|Bta08312|Bta14778|Bta03254|Bta07170|Bta03727|Bta14535|Bta00620|Bta10574|Bta10654|Bta13175|Bta09787|Bta05424	http://amigo.geneontology.org/amigo/term/GO:0005768
DNA recombination	Gene Ontology	GO:0006310	12	18	0.000167767	0.004256	Bta02303|Bta01308|Bta08533|Bta06008|Bta11161|Bta00301|Bta15429|Bta09010|Bta03339|Bta03854|Bta02565|Bta01984	http://amigo.geneontology.org/amigo/term/GO:0006310
plasma membrane	Gene Ontology	GO:0005886	132	638	0.000202108	0.00500736	Bta06544|Bta09202|Bta01175|Bta14150|Bta05628|Bta04567|Bta00685|Bta03366|Bta04484|Bta08645|Bta04167|Bta04994|Bta03457|Bta12510|Bta07998|Bta04367|Bta06725|Bta13964|Bta00171|Bta00079|Bta01076|Bta07176|Bta05895|Bta15157|Bta14355|Bta03316|Bta11615|Bta06991|Bta04523|Bta15029|Bta15587|Bta07274|Bta04720|Bta09979|Bta02612|Bta02759|Bta00577|Bta03382|Bta15246|Bta11180|Bta09823|Bta15324|Bta15052|Bta06003|Bta…	http://amigo.geneontology.org/amigo/term/GO:0005886
intra-Golgi vesicle-mediated transport	Gene Ontology	GO:0006891	13	22	0.000218416	0.0053613	Bta07262|Bta09539|Bta13328|Bta02500|Bta04208|Bta12938|Bta15083|Bta09806|Bta12469|Bta11142|Bta00221|Bta03976|Bta13419	http://amigo.geneontology.org/amigo/term/GO:0006891
iron-sulfur cluster assembly	Gene Ontology	GO:0016226	12	19	0.000242151	0.00578932	Bta05042|Bta02499|Bta15564|Bta06780|Bta01851|Bta14930|Bta04407|Bta04782|Bta07237|Bta11561|Bta10130|Bta03939	http://amigo.geneontology.org/amigo/term/GO:0016226
DNA duplex unwinding	Gene Ontology	GO:0032508	9	10	0.000242405	0.00578932	Bta04765|Bta08533|Bta06008|Bta01308|Bta15429|Bta11820|Bta12534|Bta11606|Bta06155	http://amigo.geneontology.org/amigo/term/GO:0032508
regulation of chromatin silencing	Gene Ontology	GO:0031935	9	10	0.000242405	0.00578932	Bta01004|Bta09056|Bta13737|Bta14914|Bta15688|Bta05638|Bta12457|Bta05665|Bta03423	http://amigo.geneontology.org/amigo/term/GO:0031935
ribosomal large subunit assembly	Gene Ontology	GO:0000027	10	13	0.000261648	0.00613831	Bta07809|Bta05041|Bta11250|Bta14558|Bta14628|Bta08928|Bta11814|Bta10971|Bta12159|Bta01839	http://amigo.geneontology.org/amigo/term/GO:0000027
sensory perception of sound	Gene Ontology	GO:0007605	20	49	0.000270265	0.00623293	Bta09705|Bta14260|Bta04846|Bta01066|Bta00685|Bta00684|Bta09072|Bta06429|Bta08198|Bta04522|Bta08365|Bta14740|Bta14228|Bta07998|Bta14626|Bta01762|Bta07176|Bta04523|Bta11810|Bta02759	http://amigo.geneontology.org/amigo/term/GO:0007605
flavin adenine dinucleotide binding	Gene Ontology	GO:0050660	19	45	0.000271559	0.00623293	Bta14321|Bta04990|Bta08660|Bta01917|Bta11292|Bta10913|Bta14494|Bta10911|Bta07774|Bta02397|Bta11629|Bta02413|Bta11324|Bta06051|Bta02491|Bta06539|Bta10725|Bta15226|Bta02440	http://amigo.geneontology.org/amigo/term/GO:0050660
double-strand break repair	Gene Ontology	GO:0006302	15	30	0.00029383	0.00668622	Bta01308|Bta08533|Bta06008|Bta09242|Bta00301|Bta00400|Bta09150|Bta15429|Bta11826|Bta15348|Bta03125|Bta02303|Bta02588|Bta10569|Bta01984	http://amigo.geneontology.org/amigo/term/GO:0006302
peroxisome	Gene Ontology	GO:0005777	26	75	0.00029782	0.00671932	Bta09208|Bta13277|Bta02842|Bta00757|Bta13675|Bta03852|Bta04756|Bta06701|Bta01917|Bta03555|Bta00931|Bta07177|Bta06205|Bta11244|Bta14515|Bta04471|Bta06221|Bta02413|Bta05619|Bta07476|Bta04054|Bta12788|Bta09477|Bta07881|Bta11704|Bta02864	http://amigo.geneontology.org/amigo/term/GO:0005777
zinc ion binding	Gene Ontology	GO:0008270	89	401	0.000324072	0.00721944	Bta08887|Bta06357|Bta13707|Bta06190|Bta13340|Bta12699|Bta00689|Bta09219|Bta20008|Bta00171|Bta03258|Bta05413|Bta02454|Bta00178|Bta10321|Bta15626|Bta07274|Bta15398|Bta14897|Bta10654|Bta11839|Bta00570|Bta13978|Bta01897|Bta15124|Bta07535|Bta07003|Bta03309|Bta04347|Bta02099|Bta15680|Bta01701|Bta13533|Bta03761|Bta03929|Bta03928|Bta00898|Bta04054|Bta08205|Bta06384|Bta04116|Bta08533|Bta12708|Bta01637|Bta…	http://amigo.geneontology.org/amigo/term/GO:0008270
snoRNA binding	Gene Ontology	GO:0030515	8	8	0.000342273	0.00749889	Bta08661|Bta05109|Bta09874|Bta15784|Bta04164|Bta08448|Bta15720|Bta14367	http://amigo.geneontology.org/amigo/term/GO:0030515
regulation of lipid storage	Gene Ontology	GO:0010883	11	17	0.000377343	0.00813282	Bta13714|Bta07262|Bta04208|Bta15683|Bta14355|Bta13488|Bta04143|Bta05128|Bta04144|Bta11514|Bta11542	http://amigo.geneontology.org/amigo/term/GO:0010883
autophagosome maturation	Gene Ontology	GO:0097352	11	17	0.000377343	0.00813282	Bta04562|Bta03715|Bta07699|Bta04720|Bta08645|Bta13431|Bta13340|Bta13175|Bta15124|Bta03136|Bta04588	http://amigo.geneontology.org/amigo/term/GO:0097352
transcription by RNA polymerase I	Gene Ontology	GO:0006360	9	11	0.000391025	0.00829287	Bta13445|Bta14536|Bta02099|Bta07390|Bta02688|Bta01897|Bta11752|Bta01794|Bta15611	http://amigo.geneontology.org/amigo/term/GO:0006360
ubiquitin conjugating enzyme binding	Gene Ontology	GO:0031624	9	11	0.000391025	0.00829287	Bta09487|Bta13555|Bta14333|Bta01022|Bta08558|Bta03258|Bta06357|Bta03320|Bta00288	http://amigo.geneontology.org/amigo/term/GO:0031624
DNA repair	Gene Ontology	GO:0006281	21	55	0.000395612	0.00829803	Bta01308|Bta08533|Bta06008|Bta14530|Bta00301|Bta03342|Bta15429|Bta05624|Bta04242|Bta09514|Bta03275|Bta06100|Bta14995|Bta00188|Bta12151|Bta00111|Bta09010|Bta12944|Bta08817|Bta10569|Bta01984	http://amigo.geneontology.org/amigo/term/GO:0006281
ribosomal large subunit biogenesis	Gene Ontology	GO:0042273	10	14	0.000397529	0.00829803	Bta02862|Bta02787|Bta01256|Bta00689|Bta12393|Bta00979|Bta00354|Bta06606|Bta14193|Bta01839	http://amigo.geneontology.org/amigo/term/GO:0042273
early endosome	Gene Ontology	GO:0005769	19	47	0.000419133	0.00849882	Bta08012|Bta01542|Bta02782|Bta07573|Bta14168|Bta05540|Bta13665|Bta08855|Bta12627|Bta01703|Bta14743|Bta14624|Bta04783|Bta00047|Bta13918|Bta05405|Bta02916|Bta12942|Bta12654	http://amigo.geneontology.org/amigo/term/GO:0005769
negative regulation of transcription, DNA-templated	Gene Ontology	GO:0045892	32	105	0.000437267	0.00871576	Bta01004|Bta05124|Bta01635|Bta14914|Bta02880|Bta09029|Bta11594|Bta02308|Bta01732|Bta05665|Bta06725|Bta15226|Bta13737|Bta04289|Bta03854|Bta11085|Bta15424|Bta00135|Bta15688|Bta02091|Bta05638|Bta06100|Bta10931|Bta12111|Bta12113|Bta00898|Bta15807|Bta10982|Bta03282|Bta03999|Bta03423|Bta13370	http://amigo.geneontology.org/amigo/term/GO:0045892
Metabolic pathways	KEGG PATHWAY	dme01100	305	1111	7.52538e-22	4.98744e-19	Bta13755|Bta06468|Bta12350|Bta02408|Bta07905|Bta06424|Bta07496|Bta07495|Bta08348|Bta00682|Bta01306|Bta00849|Bta01575|Bta13504|Bta04248|Bta04755|Bta07651|Bta00279|Bta02589|Bta02222|Bta11063|Bta11128|Bta02524|Bta05488|Bta03984|Bta00683|Bta06988|Bta12290|Bta04997|Bta11009|Bta04574|Bta09227|Bta08569|Bta01468|Bta14514|Bta07715|Bta13260|Bta04363|Bta03510|Bta00562|Bta05168|Bta01270|Bta08748|Bta08749|Bta…	http://www.genome.jp/kegg-bin/show_pathway?dme01100/dme:Dmel_CG14934%09red/dme:Dmel_CG14935%09red/dme:Dmel_CG5320%09red/dme:Dmel_CG3433%09red/dme:Dmel_CG11874%09red/dme:Dmel_CG14437%09red/dme:Dmel_CG7985%09red/dme:Dmel_CG8732%09red/dme:Dmel_CG11780%09red/dme:Dmel_CG30290%09red/dme:Dmel_CG8129%09red/dme:Dmel_CG8734%09red/dme:Dmel_CG4919%09red/dme:Dmel_CG18572%09red/dme:Dmel_CG7899%09red/dme:Dmel_C…
Lysosome	KEGG PATHWAY	dme04142	57	118	6.72642e-12	1.50452e-09	Bta11930|Bta15434|Bta10291|Bta14665|Bta14666|Bta13653|Bta13449|Bta08697|Bta01670|Bta11458|Bta12884|Bta13918|Bta01771|Bta01772|Bta06628|Bta10967|Bta05237|Bta15497|Bta10487|Bta09833|Bta10546|Bta09612|Bta09676|Bta00531|Bta09227|Bta14884|Bta10997|Bta02190|Bta02560|Bta11572|Bta14359|Bta01773|Bta08415|Bta14718|Bta13479|Bta02222|Bta01054|Bta01964|Bta01769|Bta11365|Bta12674|Bta09813|Bta10032|Bta15610|Bta…	http://www.genome.jp/kegg-bin/show_pathway?dme04142/dme:Dmel_CG17332%09red/dme:Dmel_CG14291%09red/dme:Dmel_CG9388%09red/dme:Dmel_CG11427%09red/dme:Dmel_CG9113%09red/dme:Dmel_CG7899%09red/dme:Dmel_CG6656%09red/dme:Dmel_CG7049%09red/dme:Dmel_CG5722%09red/dme:Dmel_CG6206%09red/dme:Dmel_CG3305%09red/dme:Dmel_CG7780%09red/dme:Dmel_CG3132%09red/dme:Dmel_CG31683%09red/dme:Dmel_CG12108%09red/dme:Dmel_CG1…
Starch and sucrose metabolism	KEGG PATHWAY	dme00500	25	33	9.57238e-09	1.03577e-06	Bta05577|Bta04421|Bta04732|Bta04731|Bta04306|Bta02522|Bta03439|Bta01478|Bta07764|Bta08425|Bta12671|Bta12578|Bta12678|Bta05340|Bta15703|Bta10614|Bta11760|Bta10225|Bta14419|Bta00587|Bta08458|Bta13237|Bta11978|Bta04339|Bta12683	http://www.genome.jp/kegg-bin/show_pathway?dme00500/dme:Dmel_CG14934%09red/dme:Dmel_CG14935%09red/dme:Dmel_CG9364%09red/dme:Dmel_CG17876%09red/dme:Dmel_CG4347%09red/dme:Dmel_CG8073%09red/dme:Dmel_CG8696%09red/dme:Dmel_CG7254%09red/dme:Dmel_CG4104%09red/dme:Dmel_CG8693%09red/dme:Dmel_CG3001%09red/dme:Dmel_CG9485%09red
Endocytosis	KEGG PATHWAY	dme04144	46	122	2.72457e-07	2.06367e-05	Bta13539|Bta00577|Bta00479|Bta12545|Bta05012|Bta04167|Bta00149|Bta10869|Bta10141|Bta06152|Bta15478|Bta02686|Bta04567|Bta02784|Bta03715|Bta11251|Bta06190|Bta11827|Bta09116|Bta12823|Bta11616|Bta01993|Bta04588|Bta08892|Bta01542|Bta08890|Bta08891|Bta14355|Bta10385|Bta07649|Bta04187|Bta01703|Bta13431|Bta02896|Bta14168|Bta00276|Bta07170|Bta03727|Bta14535|Bta05933|Bta04640|Bta14330|Bta09904|Bta09410|Bta…	http://www.genome.jp/kegg-bin/show_pathway?dme04144/dme:Dmel_CG8487%09red/dme:Dmel_CG2903%09red/dme:Dmel_CG4764%09red/dme:Dmel_CG2774%09red/dme:Dmel_CG16932%09red/dme:Dmel_CG8055%09red/dme:Dmel_CG5436%09red/dme:Dmel_CG6838%09red/dme:Dmel_CG14542%09red/dme:Dmel_CG31449%09red/dme:Dmel_CG8282%09red/dme:Dmel_CG6056%09red/dme:Dmel_CG8385%09red/dme:Dmel_CG12770%09red/dme:Dmel_CG5498%09red/dme:Dmel_CG36…
RNA polymerase	KEGG PATHWAY	dme03020	20	29	8.32046e-07	5.19001e-05	Bta13445|Bta03729|Bta14406|Bta08658|Bta02099|Bta11277|Bta02688|Bta01897|Bta07390|Bta14536|Bta11148|Bta02831|Bta11159|Bta11752|Bta01794|Bta04001|Bta11702|Bta15611|Bta07360|Bta07865	http://www.genome.jp/kegg-bin/show_pathway?dme03020/dme:Dmel_CG5380%09red/dme:Dmel_CG10122%09red/dme:Dmel_CG43662%09red/dme:Dmel_CG4033%09red/dme:Dmel_CG17209%09red/dme:Dmel_CG3284%09red/dme:Dmel_CG11979%09red/dme:Dmel_CG18600%09red/dme:Dmel_CG8344%09red/dme:Dmel_CG5147%09red/dme:Dmel_CG11246%09red/dme:Dmel_CG33785%09red/dme:Dmel_CG7339%09red/dme:Dmel_CG10582%09red/dme:Dmel_CG12267%09red/dme:Dmel…
Autophagy - animal	KEGG PATHWAY	dme04140	36	95	4.73134e-06	0.000250855	Bta09304|Bta10291|Bta08697|Bta12884|Bta04220|Bta01771|Bta01772|Bta01773|Bta03136|Bta02427|Bta03854|Bta14781|Bta08645|Bta10546|Bta09612|Bta10997|Bta12823|Bta02560|Bta14359|Bta13229|Bta12865|Bta04120|Bta14718|Bta14497|Bta13664|Bta08468|Bta01769|Bta09833|Bta08814|Bta06300|Bta13876|Bta15041|Bta11133|Bta07566|Bta05240|Bta11522	http://www.genome.jp/kegg-bin/show_pathway?dme04140/dme:Dmel_CG10539%09red/dme:Dmel_CG6975%09red/dme:Dmel_CG6877%09red/dme:Dmel_CG10861%09red/dme:Dmel_CG6116%09red/dme:Dmel_CG1548%09red/dme:Dmel_CG3305%09red/dme:Dmel_CG2699%09red/dme:Dmel_CG1347%09red/dme:Dmel_CG2087%09red/dme:Dmel_CG6692%09red/dme:Dmel_CG11968%09red/dme:Dmel_CG11173%09red/dme:Dmel_CG9375%09red/dme:Dmel_CG12223%09red/dme:Dmel_CG3…
Protein processing in endoplasmic reticulum	KEGG PATHWAY	dme04141	43	133	1.59827e-05	0.000712104	Bta02098|Bta05076|Bta02318|Bta01405|Bta07389|Bta02881|Bta04525|Bta03014|Bta05704|Bta14363|Bta02686|Bta00639|Bta11422|Bta14135|Bta15776|Bta12291|Bta03340|Bta02054|Bta08311|Bta01468|Bta14838|Bta13229|Bta08440|Bta08892|Bta08890|Bta08891|Bta13664|Bta12849|Bta04785|Bta01489|Bta13826|Bta01219|Bta01760|Bta09593|Bta06300|Bta05205|Bta09458|Bta15041|Bta04720|Bta06183|Bta08538|Bta05267|Bta04111	http://www.genome.jp/kegg-bin/show_pathway?dme04141/dme:Dmel_CG7830%09red/dme:Dmel_CG31449%09red/dme:Dmel_CG8266%09red/dme:Dmel_CG5680%09red/dme:Dmel_CG7945%09red/dme:Dmel_CG5436%09red/dme:Dmel_CG32039%09red/dme:Dmel_CG42275%09red/dme:Dmel_CG1937%09red/dme:Dmel_CG4720%09red/dme:Dmel_CG5823%09red/dme:Dmel_CG3136%09red/dme:Dmel_CG40045%09red/dme:Dmel_CG2087%09red/dme:Dmel_CG10882%09red/dme:Dmel_CG5…
Fanconi anemia pathway	KEGG PATHWAY	dme03460	16	26	2.91305e-05	0.0011192	Bta06898|Bta01308|Bta09078|Bta11826|Bta00301|Bta11120|Bta03342|Bta13959|Bta13459|Bta09150|Bta09514|Bta06008|Bta15429|Bta01111|Bta02588|Bta02303	http://www.genome.jp/kegg-bin/show_pathway?dme03460/dme:Dmel_CG10123%09red/dme:Dmel_CG8169%09red/dme:Dmel_CG12812%09red/dme:Dmel_CG12936%09red/dme:Dmel_CG6920%09red/dme:Dmel_CG10215%09red/dme:Dmel_CG7948%09red/dme:Dmel_CG3697%09red/dme:Dmel_CG11482%09red/dme:Dmel_CG7143%09red/dme:Dmel_CG3026%09red/dme:Dmel_CG15817%09red/dme:Dmel_CG12189%09red
Galactose metabolism	KEGG PATHWAY	dme00052	19	37	3.62351e-05	0.00132495	Bta05340|Bta04421|Bta10614|Bta07764|Bta11978|Bta04306|Bta10225|Bta08425|Bta20000|Bta12671|Bta12578|Bta14419|Bta01478|Bta03439|Bta12678|Bta15610|Bta00587|Bta04339|Bta12683	http://www.genome.jp/kegg-bin/show_pathway?dme00052/dme:Dmel_CG14934%09red/dme:Dmel_CG14935%09red/dme:Dmel_CG4347%09red/dme:Dmel_CG6084%09red/dme:Dmel_CG3132%09red/dme:Dmel_CG8696%09red/dme:Dmel_CG8073%09red/dme:Dmel_CG8693%09red/dme:Dmel_CG3001%09red
SNARE interactions in vesicular transport	KEGG PATHWAY	dme04130	14	21	4.84831e-05	0.00158677	Bta10299|Bta07988|Bta00401|Bta15587|Bta08645|Bta12938|Bta06466|Bta15083|Bta08312|Bta00221|Bta08012|Bta10143|Bta08094|Bta13419	http://www.genome.jp/kegg-bin/show_pathway?dme04130/dme:Dmel_CG44009%09red/dme:Dmel_CG14084%09red/dme:Dmel_CG7359%09red/dme:Dmel_CG12210%09red/dme:Dmel_CG1515%09red/dme:Dmel_CG5081%09red/dme:Dmel_CG13626%09red/dme:Dmel_CG14181%09red/dme:Dmel_CG11173%09red/dme:Dmel_CG7700%09red/dme:Dmel_CG3279%09red/dme:Dmel_CG4109%09red/dme:Dmel_CG4214%09red/dme:Dmel_CG4780%09red
Valine, leucine and isoleucine degradation	KEGG PATHWAY	dme00280	16	33	0.000244213	0.00580635	Bta14321|Bta01270|Bta12803|Bta07495|Bta05500|Bta11603|Bta00757|Bta03201|Bta07774|Bta10418|Bta08761|Bta00140|Bta15088|Bta14613|Bta13605|Bta08660	http://www.genome.jp/kegg-bin/show_pathway?dme00280/dme:Dmel_CG4389%09red/dme:Dmel_CG7113%09red/dme:Dmel_CG6638%09red/dme:Dmel_CG5044%09red/dme:Dmel_CG2118%09red/dme:Dmel_CG15093%09red/dme:Dmel_CG6543%09red/dme:Dmel_CG17691%09red/dme:Dmel_CG8199%09red/dme:Dmel_CG3267%09red/dme:Dmel_CG4703%09red/dme:Dmel_CG1140%09red/dme:Dmel_CG18155%09red/dme:Dmel_CG8778%09red
Porphyrin and chlorophyll metabolism	KEGG PATHWAY	dme00860	19	45	0.000271559	0.00623293	Bta04975|Bta02991|Bta11782|Bta10865|Bta03943|Bta10618|Bta11108|Bta14930|Bta13755|Bta08350|Bta14671|Bta07606|Bta12440|Bta07623|Bta09502|Bta12338|Bta03126|Bta02725|Bta14841	http://www.genome.jp/kegg-bin/show_pathway?dme00860/dme:Dmel_CG4302%09red/dme:Dmel_CG3433%09red/dme:Dmel_CG17324%09red/dme:Dmel_CG15661%09red/dme:Dmel_CG14716%09red/dme:Dmel_CG4573%09red/dme:Dmel_CG2098%09red/dme:Dmel_CG1818%09red/dme:Dmel_CG9165%09red/dme:Dmel_CG6649%09red/dme:Dmel_CG3803%09red/dme:Dmel_CG17323%09red/dme:Dmel_CG6475%09red/dme:Dmel_CG6022%09red/dme:Dmel_CG10335%09red/dme:Dmel_CG8…
Toll and Imd signaling pathway	KEGG PATHWAY	dme04624	24	67	0.000339585	0.00749889	Bta06544|Bta00684|Bta06429|Bta04522|Bta04523|Bta04521|Bta15240|Bta14626|Bta09823|Bta00685|Bta14468|Bta14260|Bta06906|Bta07998|Bta06300|Bta09072|Bta01740|Bta07176|Bta00635|Bta09705|Bta13941|Bta01696|Bta11810|Bta02759	http://www.genome.jp/kegg-bin/show_pathway?dme04624/dme:Dmel_CG1651%09red/dme:Dmel_CG42734%09red/dme:Dmel_CG5680%09red/dme:Dmel_CG8400%09red/dme:Dmel_CG5974%09red/dme:Dmel_CG3412%09red/dme:Dmel_CG2078%09red
Riboflavin metabolism	KEGG PATHWAY	dme00740	8	8	0.000342273	0.00749889	Bta03230|Bta00139|Bta01391|Bta09227|Bta02358|Bta06563|Bta01964|Bta03779	http://www.genome.jp/kegg-bin/show_pathway?dme00740/dme:Dmel_CG2846%09red/dme:Dmel_CG7899%09red/dme:Dmel_CG33748%09red/dme:Dmel_CG6656%09red/dme:Dmel_CG4407%09red
Ubiquitin mediated proteolysis	KEGG PATHWAY	dme04120	31	100	0.000419557	0.00849882	Bta12545|Bta12165|Bta08538|Bta01489|Bta09142|Bta02887|Bta01068|Bta15240|Bta02881|Bta06357|Bta06449|Bta13529|Bta03342|Bta15228|Bta07359|Bta14565|Bta09611|Bta00090|Bta15286|Bta11804|Bta13733|Bta08523|Bta15782|Bta13923|Bta01098|Bta02318|Bta07389|Bta14417|Bta08131|Bta14333|Bta13350	http://www.genome.jp/kegg-bin/show_pathway?dme04120/dme:Dmel_CG42616%09red/dme:Dmel_CG9153%09red/dme:Dmel_CG8610%09red/dme:Dmel_CG42279%09red/dme:Dmel_CG9291%09red/dme:Dmel_CG5788%09red/dme:Dmel_CG1937%09red/dme:Dmel_CG8284%09red/dme:Dmel_CG9949%09red/dme:Dmel_CG5823%09red/dme:Dmel_CG2218%09red/dme:Dmel_CG1401%09red/dme:Dmel_CG4274%09red/dme:Dmel_CG40045%09red/dme:Dmel_CG10254%09red/dme:Dmel_CG60…

## Sheet: magenta_GO_KEGG
##Databases: Gene Ontology, KEGG PATHWAY
##Statistical test method: hypergeometric test / Fisher's exact test
##FDR correction method: Benjamini and Hochberg
Term	Database	ID	Input	Total	P-Value	Corrected P-Value	Genes
endomembrane system	Gene Ontology	GO:0012505	23	146	6.42276e-20	2.765e-17	Bta08732|Bta01046|Bta02683|Bta11898|Bta13429|Bta04182|Bta05445|Bta04048|Bta14689|Bta00885|Bta07990|Bta03790|Bta02113|Bta15339|Bta12207|Bta01134|Bta10974|Bta15063|Bta04474|Bta14466|Bta09287|Bta08450|Bta08305	http://amigo.geneontology.org/amigo/term/GO:0012505
endoplasmic reticulum	Gene Ontology	GO:0005783	17	214	1.29705e-10	1.59537e-08	Bta02113|Bta05616|Bta00885|Bta10974|Bta06751|Bta09287|Bta15339|Bta20014|Bta07990|Bta02319|Bta12207|Bta08450|Bta03894|Bta11898|Bta10688|Bta15063|Bta04048	http://amigo.geneontology.org/amigo/term/GO:0005783
peptidase activity	Gene Ontology	GO:0008233	6	15	3.97406e-08	3.1106e-06	Bta09313|Bta10766|Bta09119|Bta09260|Bta03880|Bta13075	http://amigo.geneontology.org/amigo/term/GO:0008233
acid phosphatase activity	Gene Ontology	GO:0003993	4	8	4.19746e-06	0.000225876	Bta10828|Bta02930|Bta00181|Bta10830	http://amigo.geneontology.org/amigo/term/GO:0003993
detoxification of zinc ion	Gene Ontology	GO:0010312	4	9	6.01649e-06	0.000287789	Bta14690|Bta14339|Bta15384|Bta08730	http://amigo.geneontology.org/amigo/term/GO:0010312
zinc ion transmembrane transporter activity	Gene Ontology	GO:0005385	4	12	1.49653e-05	0.000644254	Bta14690|Bta14339|Bta15384|Bta08730	http://amigo.geneontology.org/amigo/term/GO:0005385
proteolysis involved in cellular protein catabolic process	Gene Ontology	GO:0051603	4	13	1.942e-05	0.000760029	Bta10766|Bta03880|Bta09313|Bta05912	http://amigo.geneontology.org/amigo/term/GO:0051603
phosphatase activity	Gene Ontology	GO:0016791	5	30	2.21478e-05	0.000794552	Bta13769|Bta10828|Bta02930|Bta00181|Bta10830	http://amigo.geneontology.org/amigo/term/GO:0016791
extracellular exosome	Gene Ontology	GO:0070062	4	14	2.47774e-05	0.000820513	Bta10828|Bta02930|Bta00181|Bta10830	http://amigo.geneontology.org/amigo/term/GO:0070062
membrane	Gene Ontology	GO:0016020	12	280	3.29393e-05	0.000927901	Bta08732|Bta08730|Bta02775|Bta14348|Bta05312|Bta01150|Bta01592|Bta02911|Bta11860|Bta01134|Bta15384|Bta03790	http://amigo.geneontology.org/amigo/term/GO:0016020
dephosphorylation	Gene Ontology	GO:0016311	5	34	3.80519e-05	0.000927901	Bta10828|Bta02930|Bta10830|Bta00181|Bta14395	http://amigo.geneontology.org/amigo/term/GO:0016311
calcium ion binding	Gene Ontology	GO:0005509	9	157	3.93877e-05	0.000927901	Bta02049|Bta05051|Bta02431|Bta02047|Bta06677|Bta02630|Bta05039|Bta00099|Bta09402	http://amigo.geneontology.org/amigo/term/GO:0005509
Golgi apparatus	Gene Ontology	GO:0005794	10	198	4.09526e-05	0.000927901	Bta14690|Bta05616|Bta00885|Bta08520|Bta10765|Bta01150|Bta02319|Bta12207|Bta14513|Bta10688	http://amigo.geneontology.org/amigo/term/GO:0005794
endoplasmic reticulum-Golgi intermediate compartment	Gene Ontology	GO:0005793	4	17	4.73574e-05	0.00100154	Bta00885|Bta02319|Bta08520|Bta12207	http://amigo.geneontology.org/amigo/term/GO:0005793
perivitelline space	Gene Ontology	GO:0098595	4	18	5.74385e-05	0.00112397	Bta10766|Bta03880|Bta09313|Bta05912	http://amigo.geneontology.org/amigo/term/GO:0098595
integral component of membrane	Gene Ontology	GO:0016021	20	760	8.56911e-05	0.00156979	Bta14339|Bta01046|Bta08984|Bta02319|Bta14690|Bta00885|Bta12207|Bta01824|Bta14348|Bta15339|Bta09991|Bta14959|Bta01150|Bta00991|Bta13169|Bta03790|Bta10688|Bta14748|Bta07990|Bta08732	http://amigo.geneontology.org/amigo/term/GO:0016021
cargo receptor activity	Gene Ontology	GO:0038024	3	7	0.000106452	0.00179716	Bta00885|Bta02319|Bta12207	http://amigo.geneontology.org/amigo/term/GO:0038024
Wnt protein secretion	Gene Ontology	GO:0061355	3	7	0.000106452	0.00179716	Bta00885|Bta02319|Bta12207	http://amigo.geneontology.org/amigo/term/GO:0061355
cysteine-type endopeptidase activity	Gene Ontology	GO:0004197	4	24	0.000153541	0.00240361	Bta10766|Bta03880|Bta09313|Bta05912	http://amigo.geneontology.org/amigo/term/GO:0004197
zinc ion transmembrane transport	Gene Ontology	GO:0071577	3	10	0.000248254	0.00356244	Bta14339|Bta15384|Bta08730	http://amigo.geneontology.org/amigo/term/GO:0071577
COPII-coated ER to Golgi transport vesicle	Gene Ontology	GO:0030134	3	14	0.000573414	0.00771421	Bta00885|Bta02319|Bta12207	http://amigo.geneontology.org/amigo/term/GO:0030134
Protein processing in endoplasmic reticulum	KEGG PATHWAY	dme04141	22	133	1.68388e-19	4.83275e-17	Bta13722|Bta13429|Bta11898|Bta04182|Bta05445|Bta04048|Bta14689|Bta01925|Bta07990|Bta14887|Bta09119|Bta04800|Bta02113|Bta15339|Bta12616|Bta10974|Bta11171|Bta01824|Bta09287|Bta01860|Bta08450|Bta14870	http://www.genome.jp/kegg-bin/show_pathway?dme04141/dme:Dmel_CG8286%09red/dme:Dmel_CG10130%09red/dme:Dmel_CG5809%09red/dme:Dmel_CG11642%09red/dme:Dmel_CG9429%09red/dme:Dmel_CG8983%09red/dme:Dmel_CG7556%09red/dme:Dmel_CG9035%09red/dme:Dmel_CG1937%09red/dme:Dmel_CG32701%09red/dme:Dmel_CG4164%09red/dme:Dmel_CG5520%09red/dme:Dmel_CG9022%09red/dme:Dmel_CG5474%09red/dme:Dmel_CG8669%09red/dme:Dmel_CG774…
Metabolic pathways	KEGG PATHWAY	dme01100	41	1111	3.36487e-13	7.24289e-11	Bta10828|Bta14450|Bta06664|Bta12019|Bta13722|Bta10765|Bta01735|Bta10345|Bta14422|Bta00063|Bta06134|Bta13075|Bta01937|Bta07693|Bta04716|Bta10187|Bta06665|Bta07377|Bta01464|Bta04101|Bta09402|Bta01463|Bta02930|Bta01290|Bta10830|Bta07604|Bta07602|Bta14395|Bta01763|Bta02998|Bta01925|Bta01766|Bta02658|Bta04474|Bta05616|Bta14689|Bta11506|Bta04098|Bta04701|Bta02630|Bta00181	http://www.genome.jp/kegg-bin/show_pathway?dme01100/dme:Dmel_CG31148%09red/dme:Dmel_CG14934%09red/dme:Dmel_CG9747%09red/dme:Dmel_CG1799%09red/dme:Dmel_CG7899%09red/dme:Dmel_CG7870%09red/dme:Dmel_CG7748%09red/dme:Dmel_CG6950%09red/dme:Dmel_CG10849%09red/dme:Dmel_CG2103%09red/dme:Dmel_CG11124%09red/dme:Dmel_CG2259%09red/dme:Dmel_CG6656%09red/dme:Dmel_CG10621%09red/dme:Dmel_CG4685%09red/dme:Dmel_CG1…
Lysosome	KEGG PATHWAY	dme04142	12	118	5.88514e-09	6.33388e-07	Bta10828|Bta02930|Bta02658|Bta20014|Bta10830|Bta09313|Bta07693|Bta10766|Bta05912|Bta06134|Bta03880|Bta00181	http://www.genome.jp/kegg-bin/show_pathway?dme04142/dme:Dmel_CG31148%09red/dme:Dmel_CG6903%09red/dme:Dmel_CG7049%09red/dme:Dmel_CG7899%09red/dme:Dmel_CG10992%09red/dme:Dmel_CG12163%09red/dme:Dmel_CG6656%09red/dme:Dmel_CG4851%09red
Riboflavin metabolism	KEGG PATHWAY	dme00740	4	8	4.19746e-06	0.000225876	Bta10828|Bta02930|Bta00181|Bta10830	http://www.genome.jp/kegg-bin/show_pathway?dme00740/dme:Dmel_CG7899%09red/dme:Dmel_CG6656%09red
Ascorbate and aldarate metabolism	KEGG PATHWAY	dme00053	5	33	3.3438e-05	0.000927901	Bta07604|Bta07602|Bta01766|Bta06665|Bta06664	http://www.genome.jp/kegg-bin/show_pathway?dme00053/dme:Dmel_CG6649%09red/dme:Dmel_CG15661%09red/dme:Dmel_CG6475%09red
Starch and sucrose metabolism	KEGG PATHWAY	dme00500	5	33	3.3438e-05	0.000927901	Bta01464|Bta14422|Bta02630|Bta07377|Bta01463	http://www.genome.jp/kegg-bin/show_pathway?dme00500/dme:Dmel_CG14934%09red/dme:Dmel_CG18730%09red/dme:Dmel_CG8690%09red/dme:Dmel_CG8693%09red
Retinol metabolism	KEGG PATHWAY	dme00830	5	34	3.80519e-05	0.000927901	Bta07604|Bta07602|Bta01766|Bta06665|Bta06664	http://www.genome.jp/kegg-bin/show_pathway?dme00830/dme:Dmel_CG6649%09red/dme:Dmel_CG15661%09red/dme:Dmel_CG6475%09red
Cysteine and methionine metabolism	KEGG PATHWAY	dme00270	5	36	4.87476e-05	0.00100154	Bta02998|Bta10187|Bta01937|Bta10345|Bta04701	http://www.genome.jp/kegg-bin/show_pathway?dme00270/dme:Dmel_CG10621%09red/dme:Dmel_CG2259%09red/dme:Dmel_CG11134%09red/dme:Dmel_CG6950%09red/dme:Dmel_CG11241%09red
Drug metabolism - other enzymes	KEGG PATHWAY	dme00983	7	97	7.49512e-05	0.00143407	Bta01290|Bta08899|Bta06665|Bta06664|Bta07604|Bta07602|Bta01766	http://www.genome.jp/kegg-bin/show_pathway?dme00983/dme:Dmel_CG6649%09red/dme:Dmel_CG1799%09red/dme:Dmel_CG15661%09red/dme:Dmel_CG6475%09red/dme:Dmel_CG6917%09red
Porphyrin and chlorophyll metabolism	KEGG PATHWAY	dme00860	5	45	0.000128328	0.00212481	Bta07604|Bta07602|Bta01766|Bta06665|Bta06664	http://www.genome.jp/kegg-bin/show_pathway?dme00860/dme:Dmel_CG6649%09red/dme:Dmel_CG15661%09red/dme:Dmel_CG6475%09red
Protein export	KEGG PATHWAY	dme03060	4	23	0.000132619	0.00215443	Bta07880|Bta01008|Bta05445|Bta09260	http://www.genome.jp/kegg-bin/show_pathway?dme03060/dme:Dmel_CG10130%09red/dme:Dmel_CG5677%09red/dme:Dmel_CG11500%09red/dme:Dmel_CG2358%09red
Pentose and glucuronate interconversions	KEGG PATHWAY	dme00040	5	50	0.000202518	0.00310457	Bta07604|Bta07602|Bta01766|Bta06665|Bta06664	http://www.genome.jp/kegg-bin/show_pathway?dme00040/dme:Dmel_CG6649%09red/dme:Dmel_CG15661%09red/dme:Dmel_CG6475%09red
Galactose metabolism	KEGG PATHWAY	dme00052	4	37	0.00068753	0.00883527	Bta01464|Bta14422|Bta07377|Bta01463	http://www.genome.jp/kegg-bin/show_pathway?dme00052/dme:Dmel_CG14934%09red/dme:Dmel_CG8690%09red/dme:Dmel_CG8693%09red
N-Glycan biosynthesis	KEGG PATHWAY	dme00510	4	38	0.000754123	0.00946468	Bta01925|Bta12019|Bta13722|Bta14689	http://www.genome.jp/kegg-bin/show_pathway?dme00510/dme:Dmel_CG9022%09red/dme:Dmel_CG7870%09red/dme:Dmel_CG7748%09red
Drug metabolism - cytochrome P450	KEGG PATHWAY	dme00982	5	68	0.000758493	0.00946468	Bta07604|Bta07602|Bta01766|Bta06665|Bta06664	http://www.genome.jp/kegg-bin/show_pathway?dme00982/dme:Dmel_CG6649%09red/dme:Dmel_CG15661%09red/dme:Dmel_CG6475%09red
Metabolism of xenobiotics by cytochrome P450	KEGG PATHWAY	dme00980	5	69	0.000807067	0.00992693	Bta07604|Bta07602|Bta01766|Bta06665|Bta06664	http://www.genome.jp/kegg-bin/show_pathway?dme00980/dme:Dmel_CG6649%09red/dme:Dmel_CG15661%09red/dme:Dmel_CG6475%09red

## Sheet: black_GO_KEGG
##Databases: Gene Ontology, KEGG PATHWAY
##Statistical test method: hypergeometric test / Fisher's exact test
##FDR correction method: Benjamini and Hochberg
Term	Database	ID	Input	Total	P-Value	Corrected P-Value	Genes
extracellular matrix	Gene Ontology	GO:0031012	46	116	1.21539e-27	1.51741e-24	Bta04938|Bta13760|Bta13761|Bta13762|Bta13764|Bta09589|Bta09588|Bta07372|Bta09586|Bta09581|Bta09692|Bta06865|Bta07415|Bta04049|Bta06860|Bta07793|Bta08100|Bta13325|Bta09560|Bta09563|Bta12456|Bta09543|Bta09580|Bta09547|Bta08844|Bta09544|Bta09695|Bta07720|Bta07723|Bta05101|Bta06476|Bta01884|Bta01885|Bta06861|Bta02266|Bta00526|Bta05610|Bta06858|Bta11265|Bta07466|Bta06855|Bta07378|Bta09579|Bta09552|Bta…	http://amigo.geneontology.org/amigo/term/GO:0031012
chitin-based extracellular matrix	Gene Ontology	GO:0062129	36	90	5.44248e-22	3.39747e-19	Bta07802|Bta07803|Bta07804|Bta13760|Bta13761|Bta13762|Bta13764|Bta09589|Bta09588|Bta07372|Bta09586|Bta09581|Bta09580|Bta07415|Bta04049|Bta07793|Bta09560|Bta09563|Bta07897|Bta07895|Bta09547|Bta09544|Bta10397|Bta07720|Bta09690|Bta05101|Bta01316|Bta01317|Bta06476|Bta11265|Bta07466|Bta07378|Bta09579|Bta09552|Bta09554|Bta09570	http://amigo.geneontology.org/amigo/term/GO:0062129
chitin-based cuticle development	Gene Ontology	GO:0040003	40	124	1.71669e-21	7.14427e-19	Bta01342|Bta07802|Bta07803|Bta07804|Bta13760|Bta13761|Bta11896|Bta13764|Bta09589|Bta09588|Bta07372|Bta09586|Bta09581|Bta09692|Bta10358|Bta07415|Bta04049|Bta07793|Bta09560|Bta09563|Bta07897|Bta07895|Bta09580|Bta09547|Bta09544|Bta09695|Bta07720|Bta09690|Bta05101|Bta01316|Bta01317|Bta06476|Bta11265|Bta07466|Bta13762|Bta07378|Bta09579|Bta09552|Bta09554|Bta09570	http://amigo.geneontology.org/amigo/term/GO:0040003
structural constituent of chitin-based larval cuticle	Gene Ontology	GO:0008010	32	72	8.8674e-21	2.76774e-18	Bta07802|Bta07803|Bta07804|Bta13760|Bta13761|Bta13762|Bta13764|Bta09589|Bta09588|Bta07372|Bta09586|Bta09581|Bta09580|Bta07415|Bta04049|Bta07793|Bta09560|Bta09563|Bta07897|Bta07895|Bta09547|Bta09544|Bta07720|Bta05101|Bta06476|Bta11265|Bta07466|Bta07378|Bta09579|Bta09552|Bta09554|Bta09570	http://amigo.geneontology.org/amigo/term/GO:0008010
integral component of plasma membrane	Gene Ontology	GO:0005887	54	304	3.14716e-18	7.85847e-16	Bta08195|Bta09027|Bta15375|Bta06954|Bta01570|Bta07714|Bta05294|Bta15572|Bta07062|Bta01597|Bta11238|Bta15347|Bta03039|Bta01599|Bta13549|Bta08904|Bta11004|Bta02649|Bta11430|Bta04896|Bta01598|Bta05486|Bta07893|Bta11534|Bta08605|Bta11808|Bta11570|Bta01707|Bta07098|Bta11342|Bta05583|Bta05582|Bta05581|Bta08907|Bta01600|Bta15373|Bta11032|Bta14635|Bta07053|Bta07052|Bta12896|Bta06771|Bta07405|Bta07406|Bta…	http://amigo.geneontology.org/amigo/term/GO:0005887
structural constituent of cuticle	Gene Ontology	GO:0042302	28	73	5.20306e-17	1.08267e-14	Bta07802|Bta07803|Bta07804|Bta07805|Bta13760|Bta13761|Bta13762|Bta13764|Bta09589|Bta09588|Bta07372|Bta09586|Bta09581|Bta09580|Bta04049|Bta07793|Bta09560|Bta09563|Bta07897|Bta07895|Bta09547|Bta00526|Bta06476|Bta07466|Bta07378|Bta09579|Bta09552|Bta09554	http://amigo.geneontology.org/amigo/term/GO:0042302
regulation of membrane potential	Gene Ontology	GO:0042391	18	30	5.61029e-14	8.75556e-12	Bta08904|Bta01260|Bta13709|Bta04887|Bta01259|Bta00851|Bta04896|Bta04636|Bta10374|Bta10375|Bta05486|Bta11342|Bta11534|Bta01731|Bta11032|Bta03039|Bta08907|Bta04634	http://amigo.geneontology.org/amigo/term/GO:0042391
chemical synaptic transmission	Gene Ontology	GO:0007268	23	76	1.94064e-12	2.6921e-10	Bta13016|Bta11238|Bta01731|Bta01974|Bta06089|Bta06088|Bta04636|Bta04634|Bta07260|Bta04896|Bta03039|Bta05486|Bta11534|Bta06627|Bta05381|Bta00011|Bta11158|Bta11032|Bta14416|Bta11342|Bta04887|Bta00851|Bta00344	http://amigo.geneontology.org/amigo/term/GO:0007268
plasma membrane	Gene Ontology	GO:0005886	65	638	3.09255e-11	3.67719e-09	Bta09027|Bta06954|Bta14723|Bta09046|Bta13709|Bta13016|Bta15572|Bta01155|Bta12719|Bta11238|Bta05505|Bta01974|Bta07260|Bta12194|Bta04636|Bta14254|Bta07778|Bta11007|Bta08636|Bta00942|Bta11004|Bta15143|Bta11430|Bta04896|Bta15750|Bta14683|Bta07029|Bta06678|Bta10996|Bta04634|Bta01465|Bta10568|Bta08841|Bta12347|Bta13716|Bta05381|Bta09623|Bta13532|Bta03296|Bta05583|Bta05582|Bta05581|Bta02330|Bta05827|Bta…	http://amigo.geneontology.org/amigo/term/GO:0005886
neuron projection	Gene Ontology	GO:0043005	20	68	8.29394e-11	9.00434e-09	Bta11004|Bta11342|Bta09027|Bta06954|Bta04887|Bta00851|Bta09046|Bta04636|Bta05486|Bta04342|Bta04896|Bta11534|Bta01731|Bta11808|Bta11032|Bta06089|Bta06088|Bta03039|Bta04634|Bta13051	http://amigo.geneontology.org/amigo/term/GO:0043005
calcium ion binding	Gene Ontology	GO:0005509	26	157	7.01227e-09	6.83967e-07	Bta01155|Bta00061|Bta11007|Bta06861|Bta06860|Bta08841|Bta10488|Bta04778|Bta07088|Bta10996|Bta09461|Bta06865|Bta12347|Bta08683|Bta04235|Bta08844|Bta08670|Bta07344|Bta06858|Bta06855|Bta15743|Bta02772|Bta08636|Bta12443|Bta13981|Bta10099	http://amigo.geneontology.org/amigo/term/GO:0005509
structural constituent of chitin-based cuticle	Gene Ontology	GO:0005214	13	32	7.39571e-09	6.83967e-07	Bta09695|Bta07720|Bta11265|Bta09690|Bta09692|Bta10397|Bta06023|Bta05101|Bta01316|Bta01317|Bta07415|Bta09570|Bta09544	http://amigo.geneontology.org/amigo/term/GO:0005214
intracellular membrane-bounded organelle	Gene Ontology	GO:0043231	21	105	1.13687e-08	8.87114e-07	Bta11007|Bta03431|Bta04739|Bta04543|Bta07610|Bta01053|Bta06894|Bta01237|Bta09948|Bta10567|Bta03747|Bta04537|Bta02602|Bta02330|Bta01138|Bta12685|Bta08294|Bta10962|Bta01692|Bta14222|Bta08372	http://amigo.geneontology.org/amigo/term/GO:0043231
sarcomere organization	Gene Ontology	GO:0045214	12	31	4.32641e-08	3.00084e-06	Bta12443|Bta04967|Bta08215|Bta07310|Bta07666|Bta04673|Bta06755|Bta03915|Bta01594|Bta01595|Bta15572|Bta12313	http://amigo.geneontology.org/amigo/term/GO:0045214
postsynaptic membrane	Gene Ontology	GO:0045211	12	31	4.32641e-08	3.00084e-06	Bta11342|Bta06088|Bta04110|Bta05486|Bta11534|Bta01820|Bta01731|Bta11032|Bta06089|Bta11307|Bta04636|Bta04634	http://amigo.geneontology.org/amigo/term/GO:0045211
synapse	Gene Ontology	GO:0045202	16	75	2.94534e-07	1.71035e-05	Bta11342|Bta13716|Bta04887|Bta00851|Bta06511|Bta04636|Bta13532|Bta05486|Bta04896|Bta11534|Bta01731|Bta11032|Bta06512|Bta03039|Bta04634|Bta11327	http://amigo.geneontology.org/amigo/term/GO:0045202
UDP-glycosyltransferase activity	Gene Ontology	GO:0008194	11	32	4.21194e-07	2.28635e-05	Bta04739|Bta04543|Bta07610|Bta09948|Bta03431|Bta04537|Bta02602|Bta08372|Bta01138|Bta08294|Bta12685	http://amigo.geneontology.org/amigo/term/GO:0008194
integral component of membrane	Gene Ontology	GO:0016021	61	760	4.45686e-07	2.3185e-05	Bta01598|Bta08195|Bta09240|Bta05294|Bta13016|Bta10454|Bta13813|Bta12880|Bta03771|Bta01731|Bta01974|Bta05645|Bta05646|Bta15347|Bta03039|Bta01599|Bta04634|Bta07260|Bta11004|Bta10548|Bta04896|Bta04636|Bta01816|Bta10467|Bta07893|Bta11534|Bta08605|Bta12117|Bta02486|Bta02850|Bta12347|Bta13709|Bta12194|Bta07917|Bta01707|Bta15567|Bta12881|Bta11342|Bta02879|Bta15375|Bta10113|Bta01600|Bta01744|Bta15373|Bta…	http://amigo.geneontology.org/amigo/term/GO:0016021
calcium ion transmembrane transport	Gene Ontology	GO:0070588	9	19	5.7021e-07	2.79179e-05	Bta06627|Bta09027|Bta01570|Bta01598|Bta01597|Bta01600|Bta02330|Bta11722|Bta01599	http://amigo.geneontology.org/amigo/term/GO:0070588
extracellular matrix structural constituent	Gene Ontology	GO:0005201	10	27	8.14722e-07	3.63279e-05	Bta06865|Bta04938|Bta05610|Bta06861|Bta06860|Bta07723|Bta06855|Bta12456|Bta09543|Bta06858	http://amigo.geneontology.org/amigo/term/GO:0005201
nervous system process	Gene Ontology	GO:0050877	8	15	1.24142e-06	5.25393e-05	Bta11342|Bta04887|Bta00851|Bta04896|Bta05486|Bta11534|Bta11032|Bta03039	http://amigo.geneontology.org/amigo/term/GO:0050877
heme binding	Gene Ontology	GO:0020037	19	120	1.35427e-06	5.50133e-05	Bta11263|Bta06021|Bta14965|Bta06637|Bta11173|Bta15562|Bta05553|Bta13466|Bta02092|Bta15563|Bta10567|Bta10996|Bta11962|Bta13933|Bta04129|Bta05645|Bta05646|Bta07042|Bta09509	http://amigo.geneontology.org/amigo/term/GO:0020037
apposition of dorsal and ventral imaginal disc-derived wing surfaces	Gene Ontology	GO:0007475	10	29	1.388e-06	5.50133e-05	Bta06487|Bta06865|Bta06861|Bta06860|Bta06855|Bta15572|Bta12313|Bta06858|Bta14159|Bta00053	http://amigo.geneontology.org/amigo/term/GO:0007475
phosphatidylinositol bisphosphate binding	Gene Ontology	GO:1902936	8	17	2.55946e-06	8.91802e-05	Bta12712|Bta08343|Bta14290|Bta08344|Bta13354|Bta13217|Bta00146|Bta00147	http://amigo.geneontology.org/amigo/term/GO:1902936
ion transmembrane transport	Gene Ontology	GO:0034220	8	17	2.55946e-06	8.91802e-05	Bta11342|Bta04887|Bta00851|Bta04896|Bta05486|Bta11534|Bta11032|Bta03039	http://amigo.geneontology.org/amigo/term/GO:0034220
transferase activity, transferring hexosyl groups	Gene Ontology	GO:0016758	11	40	2.6429e-06	8.91802e-05	Bta04739|Bta04543|Bta07610|Bta09948|Bta03431|Bta04537|Bta02602|Bta08372|Bta01138|Bta08294|Bta12685	http://amigo.geneontology.org/amigo/term/GO:0016758
Z disc	Gene Ontology	GO:0030018	11	40	2.6429e-06	8.91802e-05	Bta12347|Bta12443|Bta07836|Bta07666|Bta13402|Bta04673|Bta06755|Bta03915|Bta08215|Bta00344|Bta01097	http://amigo.geneontology.org/amigo/term/GO:0030018
chitin binding	Gene Ontology	GO:0008061	17	104	3.3014e-06	0.000108468	Bta05547|Bta09037|Bta13694|Bta01342|Bta09690|Bta08022|Bta08033|Bta01316|Bta01317|Bta12456|Bta10981|Bta02521|Bta12153|Bta06072|Bta06073|Bta03195|Bta10108	http://amigo.geneontology.org/amigo/term/GO:0008061
response to mechanical stimulus	Gene Ontology	GO:0009612	7	12	3.77191e-06	0.000119221	Bta07260|Bta01260|Bta01259|Bta10488|Bta08636|Bta11238|Bta01974	http://amigo.geneontology.org/amigo/term/GO:0009612
muscle tendon junction	Gene Ontology	GO:0005927	7	13	5.61286e-06	0.000170918	Bta08844|Bta07836|Bta11158|Bta13402|Bta09461|Bta00061|Bta11882	http://amigo.geneontology.org/amigo/term/GO:0005927
extracellular space	Gene Ontology	GO:0005615	45	544	7.43676e-06	0.000221066	Bta07732|Bta06936|Bta07847|Bta01884|Bta07734|Bta11281|Bta09689|Bta02886|Bta07392|Bta14509|Bta09529|Bta03878|Bta13325|Bta02115|Bta09771|Bta10624|Bta10625|Bta10626|Bta05804|Bta08082|Bta05385|Bta08917|Bta07834|Bta07723|Bta15785|Bta15562|Bta15563|Bta01744|Bta04533|Bta01885|Bta07236|Bta13348|Bta05547|Bta09623|Bta05610|Bta03167|Bta03705|Bta03164|Bta10196|Bta11280|Bta08265|Bta07093|Bta07092|Bta07091|Bta…	http://amigo.geneontology.org/amigo/term/GO:0005615
neurotransmitter receptor activity	Gene Ontology	GO:0030594	8	21	8.87447e-06	0.000254708	Bta11342|Bta04887|Bta00851|Bta04896|Bta05486|Bta11534|Bta11032|Bta03039	http://amigo.geneontology.org/amigo/term/GO:0030594
oxidation-reduction process	Gene Ontology	GO:0055114	28	274	1.36731e-05	0.000375185	Bta13466|Bta02092|Bta05176|Bta11896|Bta13933|Bta04402|Bta07042|Bta08841|Bta02401|Bta02400|Bta11160|Bta05553|Bta15671|Bta12691|Bta07330|Bta10996|Bta05964|Bta09509|Bta06021|Bta01237|Bta12611|Bta06637|Bta11173|Bta09163|Bta11281|Bta11280|Bta02947|Bta09109	http://amigo.geneontology.org/amigo/term/GO:0055114
voltage-gated potassium channel complex	Gene Ontology	GO:0008076	6	10	1.7103e-05	0.000449539	Bta08904|Bta08907|Bta10548|Bta05481|Bta13016|Bta12117	http://amigo.geneontology.org/amigo/term/GO:0008076
potassium ion transport	Gene Ontology	GO:0006813	7	17	2.19382e-05	0.000560096	Bta08904|Bta13709|Bta10548|Bta05481|Bta13016|Bta08907|Bta12117	http://amigo.geneontology.org/amigo/term/GO:0006813
signal transduction	Gene Ontology	GO:0007165	14	85	2.22064e-05	0.000560096	Bta06678|Bta11342|Bta04887|Bta11430|Bta00851|Bta04896|Bta08100|Bta05486|Bta15250|Bta11534|Bta13083|Bta11032|Bta14164|Bta03039	http://amigo.geneontology.org/amigo/term/GO:0007165
potassium ion transmembrane transport	Gene Ontology	GO:0071805	8	25	2.50881e-05	0.00059149	Bta08904|Bta10559|Bta10548|Bta13016|Bta07893|Bta08907|Bta04373|Bta12117	http://amigo.geneontology.org/amigo/term/GO:0071805
voltage-gated potassium channel activity	Gene Ontology	GO:0005249	6	11	2.55831e-05	0.00059149	Bta08904|Bta08907|Bta10548|Bta05481|Bta13016|Bta12117	http://amigo.geneontology.org/amigo/term/GO:0005249
mechanosensory behavior	Gene Ontology	GO:0007638	6	11	2.55831e-05	0.00059149	Bta08636|Bta01260|Bta01259|Bta10488|Bta05583|Bta11238	http://amigo.geneontology.org/amigo/term/GO:0007638
muscle contraction	Gene Ontology	GO:0006936	6	11	2.55831e-05	0.00059149	Bta12347|Bta04967|Bta04673|Bta01594|Bta01595|Bta11722	http://amigo.geneontology.org/amigo/term/GO:0006936
voltage-gated calcium channel complex	Gene Ontology	GO:0005891	5	7	4.97115e-05	0.00107008	Bta06627|Bta10826|Bta09027|Bta11722|Bta10827	http://amigo.geneontology.org/amigo/term/GO:0005891
cation channel activity	Gene Ontology	GO:0005261	7	20	5.09536e-05	0.00107545	Bta09027|Bta01570|Bta04887|Bta04896|Bta08636|Bta10488|Bta07066	http://amigo.geneontology.org/amigo/term/GO:0005261
oxidoreductase activity, acting on CH-OH group of donors	Gene Ontology	GO:0016614	6	13	5.25452e-05	0.00107545	Bta02401|Bta02400|Bta07330|Bta02947|Bta12611|Bta04402	http://amigo.geneontology.org/amigo/term/GO:0016614
myofibril assembly	Gene Ontology	GO:0030239	6	13	5.25452e-05	0.00107545	Bta04967|Bta07836|Bta13402|Bta04673|Bta15572|Bta01097	http://amigo.geneontology.org/amigo/term/GO:0030239
chloride transmembrane transport	Gene Ontology	GO:1902476	6	14	7.26591e-05	0.00143992	Bta04887|Bta00851|Bta04896|Bta01053|Bta11238|Bta03039	http://amigo.geneontology.org/amigo/term/GO:1902476
sulfotransferase activity	Gene Ontology	GO:0008146	5	8	7.82546e-05	0.00152658	Bta02850|Bta05555|Bta06684|Bta15118|Bta06680	http://amigo.geneontology.org/amigo/term/GO:0008146
carbohydrate metabolic process	Gene Ontology	GO:0005975	11	62	9.23962e-05	0.00173469	Bta08917|Bta09037|Bta05343|Bta13694|Bta05397|Bta14723|Bta07829|Bta01342|Bta03195|Bta03991|Bta04027	http://amigo.geneontology.org/amigo/term/GO:0005975
regulation of imaginal disc-derived wing size	Gene Ontology	GO:0044719	5	9	0.000117926	0.00218119	Bta06865|Bta06855|Bta06858|Bta06861|Bta06860	http://amigo.geneontology.org/amigo/term/GO:0044719
G protein-coupled receptor signaling pathway	Gene Ontology	GO:0007186	14	104	0.000156992	0.0028202	Bta08195|Bta11004|Bta08913|Bta15373|Bta07098|Bta08898|Bta05294|Bta14683|Bta15375|Bta10113|Bta03771|Bta08605|Bta15347|Bta10454	http://amigo.geneontology.org/amigo/term/GO:0007186
ion transport	Gene Ontology	GO:0006811	5	10	0.000171366	0.00299232	Bta04896|Bta04634|Bta04636|Bta01731|Bta04887	http://amigo.geneontology.org/amigo/term/GO:0006811
extracellular region	Gene Ontology	GO:0005576	31	373	0.000178992	0.00308236	Bta13694|Bta01342|Bta08022|Bta02886|Bta10108|Bta08846|Bta03221|Bta05353|Bta03195|Bta12456|Bta02521|Bta02728|Bta08082|Bta09037|Bta07834|Bta02939|Bta15562|Bta15563|Bta04533|Bta12153|Bta06072|Bta06073|Bta05547|Bta11281|Bta08033|Bta09642|Bta10981|Bta03897|Bta03896|Bta03895|Bta02613	http://amigo.geneontology.org/amigo/term/GO:0005576
imaginal disc-derived wing hair organization	Gene Ontology	GO:0035317	6	18	0.000221544	0.00363945	Bta10548|Bta12037|Bta04673|Bta01155|Bta01064|Bta04624	http://amigo.geneontology.org/amigo/term/GO:0035317
histone deacetylase binding	Gene Ontology	GO:0042826	6	18	0.000221544	0.00363945	Bta15593|Bta15595|Bta03460|Bta10831|Bta01617|Bta01045	http://amigo.geneontology.org/amigo/term/GO:0042826
adult somatic muscle development	Gene Ontology	GO:0007527	6	18	0.000221544	0.00363945	Bta04967|Bta01197|Bta07310|Bta01594|Bta01595|Bta04801	http://amigo.geneontology.org/amigo/term/GO:0007527
chitin metabolic process	Gene Ontology	GO:0006030	12	82	0.000228936	0.00368809	Bta05547|Bta13694|Bta08022|Bta08033|Bta12456|Bta10981|Bta02521|Bta12153|Bta06072|Bta06073|Bta03195|Bta10108	http://amigo.geneontology.org/amigo/term/GO:0006030
ionotropic glutamate receptor complex	Gene Ontology	GO:0008328	5	11	0.000241486	0.00376869	Bta08135|Bta08134|Bta04636|Bta01731|Bta04634	http://amigo.geneontology.org/amigo/term/GO:0008328
calcium ion transport	Gene Ontology	GO:0006816	7	27	0.000244839	0.00377385	Bta12347|Bta01570|Bta11722|Bta01597|Bta01600|Bta01598|Bta01599	http://amigo.geneontology.org/amigo/term/GO:0006816
actin binding	Gene Ontology	GO:0003779	10	59	0.000265591	0.00404378	Bta07836|Bta11051|Bta07666|Bta13402|Bta06755|Bta12443|Bta09461|Bta09066|Bta00061|Bta00053	http://amigo.geneontology.org/amigo/term/GO:0003779
sensory perception of sound	Gene Ontology	GO:0007605	9	49	0.000317086	0.0047411	Bta08904|Bta07260|Bta08195|Bta08975|Bta12037|Bta00581|Bta00582|Bta01064|Bta01974	http://amigo.geneontology.org/amigo/term/GO:0007605
signaling receptor activity	Gene Ontology	GO:0038023	8	39	0.000355271	0.00515762	Bta11430|Bta04636|Bta05505|Bta01820|Bta01731|Bta04110|Bta10844|Bta04634	http://amigo.geneontology.org/amigo/term/GO:0038023
neuron projection membrane	Gene Ontology	GO:0032589	6	21	0.000442067	0.00606701	Bta14544|Bta02939|Bta12896|Bta11808|Bta11570|Bta12462	http://amigo.geneontology.org/amigo/term/GO:0032589
associative learning	Gene Ontology	GO:0008306	5	13	0.000444639	0.00606701	Bta14416|Bta04634|Bta04636|Bta01731|Bta08605	http://amigo.geneontology.org/amigo/term/GO:0008306
proteolysis involved in cellular protein catabolic process	Gene Ontology	GO:0051603	5	13	0.000444639	0.00606701	Bta07093|Bta03878|Bta07091|Bta07092|Bta09771	http://amigo.geneontology.org/amigo/term/GO:0051603
learning or memory	Gene Ontology	GO:0007611	5	13	0.000444639	0.00606701	Bta06089|Bta06088|Bta05712|Bta11158|Bta10548	http://amigo.geneontology.org/amigo/term/GO:0007611
actin filament bundle assembly	Gene Ontology	GO:0051017	5	13	0.000444639	0.00606701	Bta03879|Bta12443|Bta03886|Bta01064|Bta12037	http://amigo.geneontology.org/amigo/term/GO:0051017
signaling receptor binding	Gene Ontology	GO:0005102	7	31	0.000503374	0.00675767	Bta15562|Bta15563|Bta10624|Bta10625|Bta10626|Bta04533|Bta08082	http://amigo.geneontology.org/amigo/term/GO:0005102
hydrolase activity, acting on ester bonds	Gene Ontology	GO:0016788	6	22	0.000544706	0.00704004	Bta07642|Bta07640|Bta07641|Bta05448|Bta01417|Bta01416	http://amigo.geneontology.org/amigo/term/GO:0016788
synaptic transmission, cholinergic	Gene Ontology	GO:0007271	4	7	0.000552602	0.00704004	Bta11032|Bta11342|Bta11534|Bta05486	http://amigo.geneontology.org/amigo/term/GO:0007271
acetylcholine-gated cation-selective channel activity	Gene Ontology	GO:0022848	4	7	0.000552602	0.00704004	Bta11032|Bta11342|Bta11534|Bta05486	http://amigo.geneontology.org/amigo/term/GO:0022848
voltage-gated calcium channel activity	Gene Ontology	GO:0005245	4	7	0.000552602	0.00704004	Bta06627|Bta10826|Bta11722|Bta10827	http://amigo.geneontology.org/amigo/term/GO:0005245
acetylcholine-gated channel complex	Gene Ontology	GO:0005892	4	7	0.000552602	0.00704004	Bta11032|Bta11342|Bta11534|Bta05486	http://amigo.geneontology.org/amigo/term/GO:0005892
G protein-coupled peptide receptor activity	Gene Ontology	GO:0008528	5	14	0.000584672	0.0071565	Bta15375|Bta11004|Bta15347|Bta10454|Bta15373	http://amigo.geneontology.org/amigo/term/GO:0008528
chloride channel activity	Gene Ontology	GO:0005254	5	14	0.000584672	0.0071565	Bta04896|Bta01053|Bta03039|Bta04887|Bta00851	http://amigo.geneontology.org/amigo/term/GO:0005254
peroxidase activity	Gene Ontology	GO:0004601	5	14	0.000584672	0.0071565	Bta13466|Bta06637|Bta10996|Bta02092|Bta09509	http://amigo.geneontology.org/amigo/term/GO:0004601
chitin-based embryonic cuticle biosynthetic process	Gene Ontology	GO:0008362	5	14	0.000584672	0.0071565	Bta06865|Bta06855|Bta06858|Bta06861|Bta06860	http://amigo.geneontology.org/amigo/term/GO:0008362
neuropeptide receptor activity	Gene Ontology	GO:0008188	7	32	0.00059361	0.0071606	Bta11004|Bta07098|Bta05294|Bta15375|Bta10454|Bta15373|Bta15347	http://amigo.geneontology.org/amigo/term/GO:0008188
ligand-gated ion channel activity	Gene Ontology	GO:0015276	9	55	0.00066975	0.00796365	Bta04887|Bta04896|Bta05505|Bta05503|Bta01820|Bta01731|Bta04110|Bta04636|Bta04634	http://amigo.geneontology.org/amigo/term/GO:0015276
determination of adult lifespan	Gene Ontology	GO:0008340	15	137	0.000696931	0.00813194	Bta07260|Bta15373|Bta11281|Bta06894|Bta06755|Bta15375|Bta10113|Bta12691|Bta01974|Bta07236|Bta05804|Bta06076|Bta01692|Bta14222|Bta05827	http://amigo.geneontology.org/amigo/term/GO:0008340
sensory perception of touch	Gene Ontology	GO:0050975	4	8	0.000804047	0.00885209	Bta01053|Bta04636|Bta01731|Bta04634	http://amigo.geneontology.org/amigo/term/GO:0050975
voltage-gated cation channel activity	Gene Ontology	GO:0022843	4	8	0.000804047	0.00885209	Bta08904|Bta08907|Bta10548|Bta12117	http://amigo.geneontology.org/amigo/term/GO:0022843
flight	Gene Ontology	GO:0060361	4	8	0.000804047	0.00885209	Bta08135|Bta08134|Bta04235|Bta04967	http://amigo.geneontology.org/amigo/term/GO:0060361
focal adhesion	Gene Ontology	GO:0005925	6	24	0.000804735	0.00885209	Bta07836|Bta13402|Bta15572|Bta12443|Bta08060|Bta00053	http://amigo.geneontology.org/amigo/term/GO:0005925
lysosome	Gene Ontology	GO:0005764	9	57	0.000841487	0.00909607	Bta03878|Bta02649|Bta01053|Bta09771|Bta09810|Bta07092|Bta07093|Bta13439|Bta07091	http://amigo.geneontology.org/amigo/term/GO:0005764
actin cytoskeleton organization	Gene Ontology	GO:0030036	9	57	0.000841487	0.00909607	Bta07836|Bta07310|Bta11051|Bta13402|Bta09066|Bta08215|Bta11327|Bta00061|Bta09461	http://amigo.geneontology.org/amigo/term/GO:0030036
Pentose and glucuronate interconversions	KEGG PATHWAY	dme00040	14	50	9.55564e-08	6.27906e-06	Bta04739|Bta04543|Bta07610|Bta10341|Bta10340|Bta09948|Bta03431|Bta04537|Bta02602|Bta08372|Bta01138|Bta08294|Bta12685|Bta10337	http://www.genome.jp/kegg-bin/show_pathway?dme00040/dme:Dmel_CG4302%09red/dme:Dmel_CG17323%09red/dme:Dmel_CG15661%09red/dme:Dmel_CG2767%09red/dme:Dmel_CG4772%09red/dme:Dmel_CG6475%09red
Ascorbate and aldarate metabolism	KEGG PATHWAY	dme00053	11	33	5.42443e-07	2.76425e-05	Bta04739|Bta04543|Bta07610|Bta09948|Bta03431|Bta04537|Bta02602|Bta08372|Bta01138|Bta08294|Bta12685	http://www.genome.jp/kegg-bin/show_pathway?dme00053/dme:Dmel_CG4772%09red/dme:Dmel_CG4302%09red/dme:Dmel_CG17323%09red/dme:Dmel_CG6475%09red/dme:Dmel_CG15661%09red
Retinol metabolism	KEGG PATHWAY	dme00830	11	34	6.93466e-07	3.26714e-05	Bta04739|Bta04543|Bta07610|Bta09948|Bta03431|Bta04537|Bta02602|Bta08372|Bta01138|Bta08294|Bta12685	http://www.genome.jp/kegg-bin/show_pathway?dme00830/dme:Dmel_CG4772%09red/dme:Dmel_CG4302%09red/dme:Dmel_CG17323%09red/dme:Dmel_CG6475%09red/dme:Dmel_CG15661%09red
Porphyrin and chlorophyll metabolism	KEGG PATHWAY	dme00860	12	45	1.22396e-06	5.25393e-05	Bta04739|Bta04543|Bta11160|Bta07610|Bta09948|Bta03431|Bta04537|Bta02602|Bta08372|Bta01138|Bta08294|Bta12685	http://www.genome.jp/kegg-bin/show_pathway?dme00860/dme:Dmel_CG4302%09red/dme:Dmel_CG17323%09red/dme:Dmel_CG15661%09red/dme:Dmel_CG4772%09red/dme:Dmel_CG5796%09red/dme:Dmel_CG6475%09red
Lysosome	KEGG PATHWAY	dme04142	17	118	1.47062e-05	0.000399146	Bta08917|Bta13716|Bta14669|Bta06492|Bta06136|Bta08621|Bta03221|Bta03550|Bta07685|Bta10382|Bta09771|Bta14369|Bta13058|Bta13439|Bta03878|Bta01417|Bta01416	http://www.genome.jp/kegg-bin/show_pathway?dme04142/dme:Dmel_CG12582%09red/dme:Dmel_CG13397%09red/dme:Dmel_CG6206%09red/dme:Dmel_CG5731%09red/dme:Dmel_CG7007%09red/dme:Dmel_CG8646%09red/dme:Dmel_CG7899%09red/dme:Dmel_CG10992%09red/dme:Dmel_CG31683%09red/dme:Dmel_CG1709%09red/dme:Dmel_CG6113%09red/dme:Dmel_CG6903%09red/dme:Dmel_CG4851%09red/dme:Dmel_CG1787%09red
Drug metabolism - cytochrome P450	KEGG PATHWAY	dme00982	12	68	4.68784e-05	0.0010268	Bta04739|Bta04543|Bta07610|Bta03181|Bta09948|Bta03431|Bta04537|Bta02602|Bta08372|Bta01138|Bta08294|Bta12685	http://www.genome.jp/kegg-bin/show_pathway?dme00982/dme:Dmel_CG4302%09red/dme:Dmel_CG17323%09red/dme:Dmel_CG15661%09red/dme:Dmel_CG10045%09red/dme:Dmel_CG4772%09red/dme:Dmel_CG6475%09red
Metabolism of xenobiotics by cytochrome P450	KEGG PATHWAY	dme00980	12	69	5.31569e-05	0.00107913	Bta04739|Bta04543|Bta07610|Bta03181|Bta09948|Bta03431|Bta04537|Bta02602|Bta08372|Bta01138|Bta08294|Bta12685	http://www.genome.jp/kegg-bin/show_pathway?dme00980/dme:Dmel_CG4302%09red/dme:Dmel_CG17323%09red/dme:Dmel_CG15661%09red/dme:Dmel_CG10045%09red/dme:Dmel_CG4772%09red/dme:Dmel_CG6475%09red
Neuroactive ligand-receptor interaction	KEGG PATHWAY	dme04080	10	56	0.000182547	0.00312205	Bta04887|Bta00851|Bta04896|Bta06002|Bta05294|Bta15375|Bta01731|Bta15373|Bta04636|Bta04634	http://www.genome.jp/kegg-bin/show_pathway?dme04080/dme:Dmel_CG7446%09red/dme:Dmel_CG17336%09red/dme:Dmel_CG10823%09red/dme:Dmel_CG2902%09red/dme:Dmel_CG6515%09red/dme:Dmel_CG32843%09red
Glycosaminoglycan degradation	KEGG PATHWAY	dme00531	5	15	0.000755343	0.0087319	Bta08917|Bta06136|Bta03550|Bta14369|Bta14669	http://www.genome.jp/kegg-bin/show_pathway?dme00531/dme:Dmel_CG8646%09red/dme:Dmel_CG6903%09red/dme:Dmel_CG13397%09red/dme:Dmel_CG1787%09red
Drug metabolism - other enzymes	KEGG PATHWAY	dme00983	12	97	0.000895937	0.00964291	Bta04739|Bta04543|Bta07610|Bta03181|Bta09948|Bta03431|Bta04537|Bta02602|Bta08372|Bta01138|Bta08294|Bta12685	http://www.genome.jp/kegg-bin/show_pathway?dme00983/dme:Dmel_CG4302%09red/dme:Dmel_CG17323%09red/dme:Dmel_CG15661%09red/dme:Dmel_CG10045%09red/dme:Dmel_CG4772%09red/dme:Dmel_CG6475%09red

## Sheet: green_GO_KEGG
##Databases: Gene Ontology, KEGG PATHWAY
##Statistical test method: hypergeometric test / Fisher's exact test
##FDR correction method: Benjamini and Hochberg
Term	Database	ID	Input	Total	P-Value	Corrected P-Value	Genes
mitochondrion	Gene Ontology	GO:0005739	77	445	9.05778e-25	2.95465e-22	Bta01309|Bta09686|Bta15556|Bta08754|Bta05079|Bta08985|Bta02848|Bta09223|Bta02032|Bta03935|Bta03754|Bta15531|Bta13253|Bta12961|Bta01959|Bta04263|Bta00774|Bta13834|Bta15718|Bta15706|Bta03244|Bta03985|Bta08007|Bta07371|Bta09864|Bta00888|Bta08821|Bta13866|Bta01918|Bta10351|Bta10168|Bta09917|Bta09136|Bta02833|Bta11755|Bta04028|Bta11144|Bta09047|Bta05820|Bta00910|Bta10879|Bta09399|Bta05449|Bta04424|Bta…	http://amigo.geneontology.org/amigo/term/GO:0005739
mitochondrial respiratory chain complex I	Gene Ontology	GO:0005747	26	47	7.4764e-19	1.43459e-16	Bta12259|Bta09224|Bta00127|Bta05403|Bta00774|Bta03244|Bta14131|Bta13582|Bta04618|Bta08235|Bta12825|Bta11755|Bta00094|Bta05773|Bta13267|Bta09399|Bta12192|Bta05808|Bta01231|Bta01601|Bta13866|Bta03040|Bta11011|Bta01394|Bta10611|Bta09795	http://amigo.geneontology.org/amigo/term/GO:0005747
mitochondrial electron transport, NADH to ubiquinone	Gene Ontology	GO:0006120	19	32	1.48552e-14	1.93831e-12	Bta03040|Bta14131|Bta11011|Bta12259|Bta05403|Bta01231|Bta04618|Bta09224|Bta10611|Bta08235|Bta12825|Bta11755|Bta13866|Bta00094|Bta00774|Bta05773|Bta13582|Bta13267|Bta09399	http://amigo.geneontology.org/amigo/term/GO:0006120
cytoplasmic translation	Gene Ontology	GO:0002181	24	74	2.19409e-13	2.46798e-11	Bta06158|Bta02466|Bta07165|Bta05880|Bta08230|Bta04368|Bta00197|Bta11574|Bta00569|Bta14926|Bta00423|Bta01212|Bta06475|Bta03026|Bta13626|Bta09853|Bta06263|Bta02412|Bta05347|Bta05266|Bta08799|Bta09783|Bta09261|Bta07190	http://amigo.geneontology.org/amigo/term/GO:0002181
NADH dehydrogenase activity	Gene Ontology	GO:0003954	17	28	2.79765e-13	2.94385e-11	Bta03040|Bta14131|Bta11011|Bta12259|Bta01231|Bta09224|Bta10611|Bta08235|Bta12825|Bta13866|Bta13267|Bta00094|Bta00774|Bta05773|Bta13582|Bta03244|Bta09399	http://amigo.geneontology.org/amigo/term/GO:0003954
proteolysis involved in cellular protein catabolic process	Gene Ontology	GO:0051603	13	13	2.27921e-12	2.12423e-10	Bta08698|Bta07114|Bta10363|Bta11205|Bta14722|Bta10767|Bta02848|Bta02553|Bta12986|Bta14750|Bta14751|Bta10037|Bta03881	http://amigo.geneontology.org/amigo/term/GO:0051603
cytosolic ribosome	Gene Ontology	GO:0022626	17	38	1.20841e-11	9.85461e-10	Bta00423|Bta02412|Bta05347|Bta05880|Bta06158|Bta05266|Bta08230|Bta00569|Bta04368|Bta01212|Bta03026|Bta00197|Bta09853|Bta06263|Bta07165|Bta07190|Bta11574	http://amigo.geneontology.org/amigo/term/GO:0022626
structural constituent of ribosome	Gene Ontology	GO:0003735	28	131	1.29189e-11	1.00337e-09	Bta06158|Bta02466|Bta01067|Bta07165|Bta06352|Bta13977|Bta05880|Bta06263|Bta08230|Bta04368|Bta00197|Bta11574|Bta00569|Bta14926|Bta00423|Bta01212|Bta06475|Bta03026|Bta13626|Bta09853|Bta13382|Bta02412|Bta05347|Bta05266|Bta08799|Bta07190|Bta09261|Bta09783	http://amigo.geneontology.org/amigo/term/GO:0003735
perivitelline space	Gene Ontology	GO:0098595	13	18	3.78429e-11	2.74319e-09	Bta08698|Bta07114|Bta10363|Bta11205|Bta14722|Bta10767|Bta02553|Bta09098|Bta12986|Bta14750|Bta14751|Bta10037|Bta03881	http://amigo.geneontology.org/amigo/term/GO:0098595
cysteine-type endopeptidase activity	Gene Ontology	GO:0004197	13	24	5.28253e-10	3.31377e-08	Bta08698|Bta07114|Bta10363|Bta11205|Bta14722|Bta10767|Bta02553|Bta12986|Bta14750|Bta14751|Bta10037|Bta01584|Bta03881	http://amigo.geneontology.org/amigo/term/GO:0004197
cytosolic large ribosomal subunit	Gene Ontology	GO:0022625	15	40	1.40239e-09	8.4715e-08	Bta02412|Bta08230|Bta08799|Bta14926|Bta06475|Bta04368|Bta06158|Bta02466|Bta07190|Bta00197|Bta09853|Bta06263|Bta07165|Bta09783|Bta11574	http://amigo.geneontology.org/amigo/term/GO:0022625
tricarboxylic acid cycle	Gene Ontology	GO:0006099	12	26	9.96098e-09	5.80227e-07	Bta04798|Bta08007|Bta08958|Bta09864|Bta08985|Bta09223|Bta03985|Bta04028|Bta03754|Bta04424|Bta15706|Bta02426	http://amigo.geneontology.org/amigo/term/GO:0006099
translation	Gene Ontology	GO:0006412	21	108	2.01235e-08	1.13177e-06	Bta02412|Bta05347|Bta05880|Bta06158|Bta05266|Bta06263|Bta00569|Bta08799|Bta06475|Bta04368|Bta01212|Bta13789|Bta03026|Bta13977|Bta01067|Bta00197|Bta07190|Bta13382|Bta06352|Bta09783|Bta04011	http://amigo.geneontology.org/amigo/term/GO:0006412
Z disc	Gene Ontology	GO:0030018	13	40	7.07755e-08	3.60734e-06	Bta06006|Bta00241|Bta00309|Bta14137|Bta10181|Bta07816|Bta07662|Bta08780|Bta14996|Bta01203|Bta05820|Bta07663|Bta14872	http://amigo.geneontology.org/amigo/term/GO:0030018
phototransduction	Gene Ontology	GO:0007602	13	40	7.07755e-08	3.60734e-06	Bta13074|Bta12711|Bta06562|Bta10646|Bta08366|Bta10937|Bta09262|Bta13071|Bta13072|Bta04529|Bta02469|Bta03787|Bta03537	http://amigo.geneontology.org/amigo/term/GO:0007602
cytosol	Gene Ontology	GO:0005829	51	547	8.31978e-08	3.99105e-06	Bta04852|Bta01191|Bta15556|Bta11851|Bta12257|Bta09047|Bta13507|Bta02465|Bta13789|Bta01610|Bta04223|Bta10181|Bta07041|Bta11659|Bta08968|Bta10168|Bta04672|Bta12526|Bta05820|Bta05456|Bta13322|Bta01636|Bta03395|Bta04424|Bta07816|Bta13124|Bta13645|Bta01584|Bta13049|Bta03005|Bta02457|Bta09590|Bta15725|Bta07131|Bta08958|Bta07134|Bta11078|Bta15237|Bta03350|Bta11528|Bta02294|Bta14996|Bta14089|Bta00558|Bta…	http://amigo.geneontology.org/amigo/term/GO:0005829
peptidase activity	Gene Ontology	GO:0008233	9	15	1.32673e-07	6.18258e-06	Bta10363|Bta14722|Bta10767|Bta02553|Bta12986|Bta14750|Bta14751|Bta10037|Bta03881	http://amigo.geneontology.org/amigo/term/GO:0008233
NADH dehydrogenase (ubiquinone) activity	Gene Ontology	GO:0008137	10	22	1.9336e-07	8.7603e-06	Bta13866|Bta04618|Bta13582|Bta10611|Bta12825|Bta13267|Bta05808|Bta05773|Bta03244|Bta09399	http://amigo.geneontology.org/amigo/term/GO:0008137
terminal bouton	Gene Ontology	GO:0043195	12	38	2.92646e-07	1.25607e-05	Bta15109|Bta15586|Bta10383|Bta09602|Bta07490|Bta13513|Bta14089|Bta12659|Bta13514|Bta01997|Bta07041|Bta05944	http://amigo.geneontology.org/amigo/term/GO:0043195
M band	Gene Ontology	GO:0031430	8	12	3.75633e-07	1.55103e-05	Bta00867|Bta10181|Bta00309|Bta14996|Bta01203|Bta11308|Bta07663|Bta14872	http://amigo.geneontology.org/amigo/term/GO:0031430
lysosome	Gene Ontology	GO:0005764	14	57	4.14482e-07	1.66919e-05	Bta08698|Bta07114|Bta10363|Bta11205|Bta14352|Bta14722|Bta10767|Bta04219|Bta02553|Bta12986|Bta14750|Bta14751|Bta10037|Bta03881	http://amigo.geneontology.org/amigo/term/GO:0005764
ATP synthesis coupled proton transport	Gene Ontology	GO:0015986	9	18	4.28816e-07	1.6853e-05	Bta13253|Bta00273|Bta04704|Bta01057|Bta07743|Bta10414|Bta04620|Bta11144|Bta00910	http://amigo.geneontology.org/amigo/term/GO:0015986
cytosolic small ribosomal subunit	Gene Ontology	GO:0022627	11	32	4.56699e-07	1.75265e-05	Bta05347|Bta05880|Bta05266|Bta00569|Bta00423|Bta01212|Bta08818|Bta03026|Bta13626|Bta09261|Bta09783	http://amigo.geneontology.org/amigo/term/GO:0022627
cytochrome-c oxidase activity	Gene Ontology	GO:0004129	9	19	6.10525e-07	2.28912e-05	Bta08349|Bta10351|Bta04589|Bta03935|Bta09475|Bta12961|Bta00094|Bta09984|Bta12656	http://amigo.geneontology.org/amigo/term/GO:0004129
proton transmembrane transport	Gene Ontology	GO:1902600	13	51	7.49039e-07	2.74535e-05	Bta09165|Bta00273|Bta04704|Bta10414|Bta01057|Bta07743|Bta08201|Bta00642|Bta00910|Bta03951|Bta04620|Bta11144|Bta15075	http://amigo.geneontology.org/amigo/term/GO:1902600
oxidation-reduction process	Gene Ontology	GO:0055114	30	274	2.26782e-06	7.78697e-05	Bta04790|Bta04696|Bta05319|Bta02032|Bta07221|Bta04309|Bta14961|Bta02405|Bta08958|Bta15670|Bta08043|Bta10168|Bta09884|Bta09795|Bta06556|Bta04689|Bta14960|Bta02087|Bta07913|Bta00657|Bta07543|Bta04648|Bta06671|Bta06674|Bta14996|Bta02801|Bta09262|Bta07866|Bta11812|Bta14872	http://amigo.geneontology.org/amigo/term/GO:0055114
pyruvate metabolic process	Gene Ontology	GO:0006090	8	17	2.71966e-06	9.14591e-05	Bta14961|Bta01400|Bta14960|Bta09047|Bta05449|Bta04784|Bta13507|Bta13834	http://amigo.geneontology.org/amigo/term/GO:0006090
intracellular membrane-bounded organelle	Gene Ontology	GO:0043231	17	105	4.12712e-06	0.000134627	Bta07543|Bta00548|Bta03502|Bta03350|Bta07704|Bta02342|Bta09884|Bta01304|Bta02604|Bta00657|Bta07747|Bta09504|Bta02228|Bta12684|Bta05951|Bta06448|Bta02981	http://amigo.geneontology.org/amigo/term/GO:0043231
mitochondrial respiratory chain complex IV	Gene Ontology	GO:0005751	7	13	5.92233e-06	0.000189399	Bta10351|Bta04589|Bta03935|Bta09475|Bta00094|Bta09984|Bta12656	http://amigo.geneontology.org/amigo/term/GO:0005751
unfolded protein binding	Gene Ontology	GO:0051082	13	66	8.86715e-06	0.000272874	Bta11851|Bta03502|Bta03730|Bta09928|Bta00430|Bta08575|Bta15531|Bta12063|Bta08145|Bta06085|Bta05820|Bta03005|Bta06086	http://amigo.geneontology.org/amigo/term/GO:0051082
sarcomere organization	Gene Ontology	GO:0045214	9	31	1.59968e-05	0.00047533	Bta04605|Bta14137|Bta14019|Bta07662|Bta11308|Bta07993|Bta05570|Bta03744|Bta02223	http://amigo.geneontology.org/amigo/term/GO:0045214
sodium ion transmembrane transport	Gene Ontology	GO:0035725	8	23	1.61746e-05	0.00047533	Bta15577|Bta04218|Bta08201|Bta03867|Bta13071|Bta13072|Bta13074|Bta03951	http://amigo.geneontology.org/amigo/term/GO:0035725
mitochondrial electron transport, cytochrome c to oxygen	Gene Ontology	GO:0006123	7	16	1.69363e-05	0.00048431	Bta10351|Bta10168|Bta04589|Bta03935|Bta09475|Bta09984|Bta12656	http://amigo.geneontology.org/amigo/term/GO:0006123
integral component of membrane	Gene Ontology	GO:0016021	56	760	1.81956e-05	0.000494617	Bta04798|Bta00241|Bta14581|Bta05079|Bta07906|Bta09061|Bta13774|Bta06403|Bta06562|Bta06400|Bta03287|Bta11239|Bta00141|Bta13071|Bta13072|Bta06448|Bta13074|Bta03951|Bta02780|Bta04244|Bta00222|Bta01918|Bta01282|Bta10937|Bta10607|Bta10356|Bta03502|Bta01832|Bta10646|Bta07188|Bta12811|Bta15838|Bta07993|Bta01188|Bta13710|Bta10383|Bta12711|Bta00131|Bta03020|Bta04648|Bta13281|Bta01669|Bta11223|Bta08349|Bta…	http://amigo.geneontology.org/amigo/term/GO:0016021
plasma membrane	Gene Ontology	GO:0005886	49	638	2.29927e-05	0.000604857	Bta13702|Bta13253|Bta15577|Bta05491|Bta07490|Bta05151|Bta00642|Bta14253|Bta02223|Bta02813|Bta15075|Bta10277|Bta11659|Bta07475|Bta05783|Bta12257|Bta11846|Bta05820|Bta03951|Bta08169|Bta10314|Bta01010|Bta14653|Bta03291|Bta00131|Bta01234|Bta13124|Bta10915|Bta13513|Bta10646|Bta14774|Bta10937|Bta07747|Bta13514|Bta03867|Bta09834|Bta02432|Bta02796|Bta09624|Bta04218|Bta09600|Bta12659|Bta02294|Bta15586|Bta…	http://amigo.geneontology.org/amigo/term/GO:0005886
muscle contraction	Gene Ontology	GO:0006936	6	11	2.67893e-05	0.000693546	Bta01191|Bta01193|Bta11308|Bta13049|Bta05570|Bta03744	http://amigo.geneontology.org/amigo/term/GO:0006936
rhabdomere	Gene Ontology	GO:0016028	8	27	4.21313e-05	0.00106537	Bta07475|Bta12257|Bta12711|Bta08366|Bta10646|Bta04529|Bta03787|Bta03537	http://amigo.geneontology.org/amigo/term/GO:0016028
calcium ion binding	Gene Ontology	GO:0005509	19	157	4.77042e-05	0.00117887	Bta04236|Bta13072|Bta04665|Bta08821|Bta12257|Bta06857|Bta10879|Bta07588|Bta07490|Bta12895|Bta12756|Bta07325|Bta05000|Bta13049|Bta13071|Bta05570|Bta13074|Bta07041|Bta01776	http://amigo.geneontology.org/amigo/term/GO:0005509
respiratory electron transport chain	Gene Ontology	GO:0022904	5	7	5.1689e-05	0.00124896	Bta10718|Bta12825|Bta00127|Bta11011|Bta05403	http://amigo.geneontology.org/amigo/term/GO:0022904
presynaptic membrane	Gene Ontology	GO:0042734	7	21	6.9193e-05	0.0016238	Bta15577|Bta07490|Bta13513|Bta03291|Bta13514|Bta03867|Bta05944	http://amigo.geneontology.org/amigo/term/GO:0042734
sensory perception of sound	Gene Ontology	GO:0007605	10	49	7.39008e-05	0.00170968	Bta10277|Bta10314|Bta07475|Bta12257|Bta12711|Bta07490|Bta03291|Bta08366|Bta10646|Bta09834	http://amigo.geneontology.org/amigo/term/GO:0007605
cytoplasm	Gene Ontology	GO:0005737	85	1386	8.74643e-05	0.00196765	Bta00241|Bta13281|Bta01557|Bta12257|Bta00329|Bta14351|Bta01302|Bta01630|Bta00430|Bta15531|Bta13392|Bta08388|Bta00021|Bta13507|Bta15629|Bta11718|Bta04244|Bta11157|Bta15368|Bta08968|Bta12893|Bta13871|Bta02342|Bta04529|Bta00867|Bta03730|Bta15710|Bta15109|Bta08043|Bta01997|Bta10937|Bta03537|Bta09884|Bta05449|Bta03985|Bta05989|Bta11659|Bta08145|Bta09294|Bta05820|Bta09541|Bta11437|Bta01832|Bta00277|Bta…	http://amigo.geneontology.org/amigo/term/GO:0005737
protein kinase activity	Gene Ontology	GO:0004672	11	63	0.000112687	0.00250057	Bta11659|Bta05068|Bta06085|Bta14137|Bta07662|Bta11308|Bta06086|Bta10958|Bta07219|Bta07218|Bta01997	http://amigo.geneontology.org/amigo/term/GO:0004672
protein folding	Gene Ontology	GO:0006457	11	64	0.000127553	0.00279247	Bta02342|Bta04689|Bta09928|Bta00430|Bta08575|Bta15531|Bta12063|Bta08145|Bta12893|Bta05820|Bta03005	http://amigo.geneontology.org/amigo/term/GO:0006457
glycolytic process	Gene Ontology	GO:0006096	7	25	0.000172108	0.00350886	Bta01010|Bta10181|Bta00309|Bta01836|Bta01203|Bta13507|Bta14872	http://amigo.geneontology.org/amigo/term/GO:0006096
NAD binding	Gene Ontology	GO:0051287	7	25	0.000172108	0.00350886	Bta08007|Bta08958|Bta13866|Bta14961|Bta14960|Bta14996|Bta14872	http://amigo.geneontology.org/amigo/term/GO:0051287
mitochondrial proton-transporting ATP synthase complex, coupling factor F(o)	Gene Ontology	GO:0000276	5	10	0.000178042	0.00351984	Bta07743|Bta09165|Bta04704|Bta11144|Bta00910	http://amigo.geneontology.org/amigo/term/GO:0000276
proton-transporting ATP synthase activity, rotational mechanism	Gene Ontology	GO:0046933	5	10	0.000178042	0.00351984	Bta10414|Bta13253|Bta00273|Bta01057|Bta04620	http://amigo.geneontology.org/amigo/term/GO:0046933
electron transport chain	Gene Ontology	GO:0022900	4	5	0.000231421	0.00439141	Bta03754|Bta10718|Bta13253|Bta05808	http://amigo.geneontology.org/amigo/term/GO:0022900
liquid clearance, open tracheal system	Gene Ontology	GO:0035002	6	18	0.000231552	0.00439141	Bta07543|Bta09884|Bta03767|Bta00657|Bta00642|Bta15075	http://amigo.geneontology.org/amigo/term/GO:0035002
neurotransmitter secretion	Gene Ontology	GO:0007269	9	47	0.000256391	0.0048066	Bta15586|Bta14703|Bta07588|Bta13124|Bta12659|Bta09285|Bta00021|Bta05820|Bta15109	http://amigo.geneontology.org/amigo/term/GO:0007269
eukaryotic translation initiation factor 3 complex	Gene Ontology	GO:0005852	5	12	0.000344177	0.0062028	Bta04467|Bta13789|Bta04672|Bta09504|Bta08224	http://amigo.geneontology.org/amigo/term/GO:0005852
deactivation of rhodopsin mediated signaling	Gene Ontology	GO:0016059	5	12	0.000344177	0.0062028	Bta12257|Bta08366|Bta04529|Bta07475|Bta03537	http://amigo.geneontology.org/amigo/term/GO:0016059
electron transfer activity	Gene Ontology	GO:0009055	7	29	0.000373613	0.00662351	Bta10718|Bta07302|Bta10168|Bta08985|Bta03754|Bta03244|Bta05773	http://amigo.geneontology.org/amigo/term/GO:0009055
myofibril assembly	Gene Ontology	GO:0030239	5	13	0.000461598	0.00792605	Bta05570|Bta03744|Bta00867|Bta07816|Bta02796	http://amigo.geneontology.org/amigo/term/GO:0030239
mesoderm development	Gene Ontology	GO:0007498	9	52	0.000494991	0.00840968	Bta00241|Bta00867|Bta14137|Bta06006|Bta07662|Bta01203|Bta07993|Bta13049|Bta05570	http://amigo.geneontology.org/amigo/term/GO:0007498
mitochondrial inner membrane	Gene Ontology	GO:0005743	11	77	0.00053148	0.0088907	Bta04798|Bta08821|Bta10718|Bta10168|Bta09136|Bta11663|Bta03570|Bta05820|Bta07188|Bta10879|Bta04719	http://amigo.geneontology.org/amigo/term/GO:0005743
integral component of mitochondrial inner membrane	Gene Ontology	GO:0031305	6	22	0.000568702	0.00893819	Bta10718|Bta15718|Bta13834|Bta12652|Bta14103|Bta15838	http://amigo.geneontology.org/amigo/term/GO:0031305
regulation of short-term neuronal synaptic plasticity	Gene Ontology	GO:0048172	4	7	0.000569939	0.00893819	Bta12659|Bta15109|Bta09285|Bta08169	http://amigo.geneontology.org/amigo/term/GO:0048172
cellular protein modification process	Gene Ontology	GO:0006464	4	7	0.000569939	0.00893819	Bta06671|Bta06674|Bta07816|Bta09783	http://amigo.geneontology.org/amigo/term/GO:0006464
mitochondrial proton-transporting ATP synthase complex, catalytic sector F(1)	Gene Ontology	GO:0000275	4	7	0.000569939	0.00893819	Bta10414|Bta13253|Bta00273|Bta04620	http://amigo.geneontology.org/amigo/term/GO:0000275
sarcolemma	Gene Ontology	GO:0042383	4	7	0.000569939	0.00893819	Bta13071|Bta13072|Bta13074|Bta07993	http://amigo.geneontology.org/amigo/term/GO:0042383
mitochondrial electron transport, ubiquinol to cytochrome c	Gene Ontology	GO:0006122	5	14	0.000606814	0.00942584	Bta02833|Bta09686|Bta10168|Bta10590|Bta04477	http://amigo.geneontology.org/amigo/term/GO:0006122
proteolysis	Gene Ontology	GO:0006508	29	364	0.00061686	0.0094915	Bta01345|Bta12629|Bta01557|Bta04792|Bta05151|Bta10767|Bta04226|Bta09094|Bta09096|Bta01281|Bta14722|Bta09098|Bta03881|Bta02874|Bta12631|Bta10363|Bta14750|Bta14751|Bta10037|Bta12221|Bta03742|Bta10132|Bta07785|Bta07784|Bta09624|Bta14352|Bta12986|Bta00224|Bta02553	http://amigo.geneontology.org/amigo/term/GO:0006508
UDP-glycosyltransferase activity	Gene Ontology	GO:0008194	7	32	0.000623082	0.00949763	Bta00548|Bta07704|Bta01304|Bta02604|Bta02228|Bta12684|Bta05951	http://amigo.geneontology.org/amigo/term/GO:0008194
Metabolic pathways	KEGG PATHWAY	dme01100	151	1111	8.36607e-38	9.09671e-35	Bta01309|Bta09686|Bta08943|Bta09047|Bta01304|Bta05403|Bta13253|Bta00642|Bta13507|Bta03754|Bta03244|Bta02426|Bta07794|Bta08007|Bta01636|Bta13582|Bta04618|Bta01836|Bta00094|Bta00329|Bta12514|Bta13267|Bta06556|Bta00273|Bta07704|Bta05899|Bta11467|Bta01601|Bta07422|Bta09165|Bta08349|Bta03188|Bta04477|Bta05491|Bta03249|Bta02860|Bta10414|Bta08750|Bta14378|Bta14457|Bta09224|Bta10292|Bta09223|Bta03935|Bta…	http://www.genome.jp/kegg-bin/show_pathway?dme01100/dme:Dmel_CG14934%09red/dme:Dmel_CG9603%09red/dme:Dmel_CG17273%09red/dme:Dmel_CG3861%09red/dme:Dmel_CG12311%09red/dme:Dmel_CG9032%09red/dme:Dmel_CG11951%09red/dme:Dmel_CG8630%09red/dme:Dmel_CG3940%09red/dme:Dmel_CG11956%09red/dme:Dmel_CG3576%09red/dme:Dmel_CG32230%09red/dme:Dmel_CG6058%09red/dme:Dmel_CG4802%09red/dme:Dmel_CG1444%09red/dme:Dmel_CG…
Oxidative phosphorylation	KEGG PATHWAY	dme00190	60	144	1.56707e-36	1.27795e-33	Bta04798|Bta09686|Bta13253|Bta12259|Bta08985|Bta09224|Bta00127|Bta05403|Bta12961|Bta00642|Bta00774|Bta03754|Bta03244|Bta15075|Bta05601|Bta10351|Bta13582|Bta05808|Bta08867|Bta08235|Bta12825|Bta11755|Bta11144|Bta00094|Bta12514|Bta00910|Bta10611|Bta04589|Bta13267|Bta09399|Bta09165|Bta12192|Bta00273|Bta14131|Bta01231|Bta01057|Bta07743|Bta00421|Bta03935|Bta05773|Bta01601|Bta09984|Bta04620|Bta13866|Bta…	http://www.genome.jp/kegg-bin/show_pathway?dme00190/dme:Dmel_CG9603%09red/dme:Dmel_CG9032%09red/dme:Dmel_CG15434%09red/dme:Dmel_CG3612%09red/dme:Dmel_CG13240%09red/dme:Dmel_CG7610%09red/dme:Dmel_CG8189%09red/dme:Dmel_CG3192%09red/dme:Dmel_CG1970%09red/dme:Dmel_CG4769%09red/dme:Dmel_CG14028%09red/dme:Dmel_CG6343%09red/dme:Dmel_CG6030%09red/dme:Dmel_CG32230%09red/dme:Dmel_CG34439%09red/dme:Dmel_CG3…
Citrate cycle (TCA cycle)	KEGG PATHWAY	dme00020	23	43	1.37906e-16	2.14213e-14	Bta04798|Bta08985|Bta13569|Bta09223|Bta01972|Bta03754|Bta04424|Bta02426|Bta08007|Bta09864|Bta05449|Bta03985|Bta04028|Bta11390|Bta11964|Bta09047|Bta01400|Bta02470|Bta04825|Bta15706|Bta08958|Bta04784|Bta02860	http://www.genome.jp/kegg-bin/show_pathway?dme00020/dme:Dmel_CG5261%09red/dme:Dmel_CG12233%09red/dme:Dmel_CG5028%09red/dme:Dmel_CG4094%09red/dme:Dmel_CG7430%09red/dme:Dmel_CG6439%09red/dme:Dmel_CG1065%09red/dme:Dmel_CG17725%09red/dme:Dmel_CG11661%09red/dme:Dmel_CG10219%09red/dme:Dmel_CG3861%09red/dme:Dmel_CG3283%09red/dme:Dmel_CG17246%09red/dme:Dmel_CG5214%09red/dme:Dmel_CG11963%09red/dme:Dmel_CG…
Carbon metabolism	KEGG PATHWAY	dme01200	33	123	7.25091e-16	1.07511e-13	Bta01309|Bta04798|Bta08985|Bta13569|Bta09223|Bta00309|Bta01972|Bta01203|Bta13507|Bta03754|Bta04424|Bta02426|Bta08007|Bta09864|Bta14961|Bta10181|Bta05449|Bta03985|Bta01836|Bta04028|Bta11390|Bta11964|Bta01010|Bta01400|Bta14960|Bta02470|Bta04825|Bta15725|Bta15706|Bta08958|Bta04784|Bta02860|Bta14872	http://www.genome.jp/kegg-bin/show_pathway?dme01200/dme:Dmel_CG3283%09red/dme:Dmel_CG3861%09red/dme:Dmel_CG12233%09red/dme:Dmel_CG1640%09red/dme:Dmel_CG5028%09red/dme:Dmel_CG4094%09red/dme:Dmel_CG6058%09red/dme:Dmel_CG7430%09red/dme:Dmel_CG6439%09red/dme:Dmel_CG1065%09red/dme:Dmel_CG11661%09red/dme:Dmel_CG10219%09red/dme:Dmel_CG5261%09red/dme:Dmel_CG12055%09red/dme:Dmel_CG4389%09red/dme:Dmel_CG17…
Ribosome	KEGG PATHWAY	dme03010	37	240	3.66024e-11	2.74319e-09	Bta06070|Bta06158|Bta01202|Bta02466|Bta01067|Bta07165|Bta06352|Bta13977|Bta05880|Bta08230|Bta04368|Bta11945|Bta00197|Bta11574|Bta00728|Bta00569|Bta14926|Bta01929|Bta01212|Bta06475|Bta03026|Bta13626|Bta09853|Bta06263|Bta00423|Bta02412|Bta05347|Bta05266|Bta02651|Bta08799|Bta02438|Bta09476|Bta00114|Bta00189|Bta07190|Bta09261|Bta09783	http://www.genome.jp/kegg-bin/show_pathway?dme03010/dme:Dmel_CG3922%09red/dme:Dmel_CG15442%09red/dme:Dmel_CG7490%09red/dme:Dmel_CG3203%09red/dme:Dmel_CG8495%09red/dme:Dmel_CG14792%09red/dme:Dmel_CG3195%09red/dme:Dmel_CG7283%09red/dme:Dmel_CG5920%09red/dme:Dmel_CG5219%09red/dme:Dmel_CG17420%09red/dme:Dmel_CG10071%09red/dme:Dmel_CG4863%09red/dme:Dmel_CG3661%09red/dme:Dmel_CG31450%09red/dme:Dmel_CG2…
Biosynthesis of amino acids	KEGG PATHWAY	dme01230	16	66	7.25961e-08	3.64321e-06	Bta05449|Bta08007|Bta08958|Bta09864|Bta01010|Bta13569|Bta10181|Bta09223|Bta04424|Bta00309|Bta01836|Bta01203|Bta13507|Bta00151|Bta15725|Bta14872	http://www.genome.jp/kegg-bin/show_pathway?dme01230/dme:Dmel_CG12055%09red/dme:Dmel_CG7470%09red/dme:Dmel_CG1516%09red/dme:Dmel_CG6058%09red/dme:Dmel_CG3861%09red/dme:Dmel_CG1721%09red/dme:Dmel_CG3127%09red/dme:Dmel_CG12233%09red/dme:Dmel_CG1640%09red/dme:Dmel_CG17654%09red/dme:Dmel_CG7176%09red/dme:Dmel_CG5028%09red/dme:Dmel_CG6439%09red/dme:Dmel_CG4001%09red/dme:Dmel_CG7070%09red/dme:Dmel_CG924…
Pyruvate metabolism	KEGG PATHWAY	dme00620	13	46	2.75362e-07	1.23045e-05	Bta01972|Bta14961|Bta01400|Bta14960|Bta09047|Bta08043|Bta13507|Bta02470|Bta05449|Bta03985|Bta04784|Bta11390|Bta11964	http://www.genome.jp/kegg-bin/show_pathway?dme00620/dme:Dmel_CG1516%09red/dme:Dmel_CG4094%09red/dme:Dmel_CG5889%09red/dme:Dmel_CG7430%09red/dme:Dmel_CG10160%09red/dme:Dmel_CG11876%09red/dme:Dmel_CG7010%09red/dme:Dmel_CG17725%09red/dme:Dmel_CG7998%09red/dme:Dmel_CG7070%09red/dme:Dmel_CG5261%09red
Glycolysis / Gluconeogenesis	KEGG PATHWAY	dme00010	14	55	2.85773e-07	1.25607e-05	Bta01010|Bta01400|Bta09047|Bta08043|Bta13507|Bta10181|Bta00309|Bta01972|Bta01836|Bta04784|Bta01203|Bta11390|Bta11964|Bta14872	http://www.genome.jp/kegg-bin/show_pathway?dme00010/dme:Dmel_CG12055%09red/dme:Dmel_CG6058%09red/dme:Dmel_CG5261%09red/dme:Dmel_CG1721%09red/dme:Dmel_CG7430%09red/dme:Dmel_CG3127%09red/dme:Dmel_CG10160%09red/dme:Dmel_CG17654%09red/dme:Dmel_CG11876%09red/dme:Dmel_CG4001%09red/dme:Dmel_CG17725%09red/dme:Dmel_CG7070%09red/dme:Dmel_CG7010%09red
Autophagy - animal	KEGG PATHWAY	dme04140	15	95	1.95916e-05	0.000528163	Bta03596|Bta10363|Bta00441|Bta13281|Bta14722|Bta10767|Bta02553|Bta12986|Bta14750|Bta14751|Bta10037|Bta13838|Bta06086|Bta06085|Bta03881	http://www.genome.jp/kegg-bin/show_pathway?dme04140/dme:Dmel_CG3615%09red/dme:Dmel_CG4583%09red/dme:Dmel_CG42349%09red/dme:Dmel_CG10992%09red/dme:Dmel_CG31033%09red/dme:Dmel_CG45051%09red
2-Oxocarboxylic acid metabolism	KEGG PATHWAY	dme01210	7	19	4.10994e-05	0.00105564	Bta08007|Bta08958|Bta09864|Bta13569|Bta09223|Bta04424|Bta15725	http://www.genome.jp/kegg-bin/show_pathway?dme01210/dme:Dmel_CG3861%09red/dme:Dmel_CG1640%09red/dme:Dmel_CG12233%09red/dme:Dmel_CG7176%09red/dme:Dmel_CG9244%09red/dme:Dmel_CG6439%09red/dme:Dmel_CG5028%09red
Fatty acid metabolism	KEGG PATHWAY	dme01212	10	53	0.000130968	0.00284811	Bta07794|Bta01309|Bta15556|Bta03188|Bta07645|Bta04790|Bta09917|Bta03249|Bta02032|Bta09324	http://www.genome.jp/kegg-bin/show_pathway?dme01212/dme:Dmel_CG1444%09red/dme:Dmel_CG4389%09red/dme:Dmel_CG17374%09red/dme:Dmel_CG4581%09red/dme:Dmel_CG3523%09red/dme:Dmel_CG3961%09red/dme:Dmel_CG8630%09red/dme:Dmel_CG16935%09red/dme:Dmel_CG12262%09red/dme:Dmel_CG10849%09red
Lysosome	KEGG PATHWAY	dme04142	15	118	0.00017942	0.00352572	Bta08698|Bta14750|Bta10363|Bta11205|Bta08750|Bta10767|Bta02553|Bta14722|Bta10037|Bta12986|Bta15443|Bta14751|Bta14774|Bta07114|Bta03881	http://www.genome.jp/kegg-bin/show_pathway?dme04142/dme:Dmel_CG12163%09red/dme:Dmel_CG18278%09red/dme:Dmel_CG10992%09red/dme:Dmel_CG6656%09red/dme:Dmel_CG1318%09red
Porphyrin and chlorophyll metabolism	KEGG PATHWAY	dme00860	9	45	0.00019268	0.00376361	Bta08349|Bta00548|Bta07704|Bta01304|Bta13019|Bta07603|Bta12684|Bta05951|Bta02604	http://www.genome.jp/kegg-bin/show_pathway?dme00860/dme:Dmel_CG6633%09red/dme:Dmel_CG10178%09red/dme:Dmel_CG6649%09red/dme:Dmel_CG3017%09red/dme:Dmel_CG15661%09red/dme:Dmel_CG5037%09red
Phototransduction - fly	KEGG PATHWAY	dme04745	8	38	0.000322009	0.00600225	Bta08780|Bta07475|Bta12257|Bta08366|Bta10646|Bta14253|Bta04529|Bta03537	http://www.genome.jp/kegg-bin/show_pathway?dme04745/dme:Dmel_CG8472%09red/dme:Dmel_CG5125%09red/dme:Dmel_CG5178%09red/dme:Dmel_CG5962%09red/dme:Dmel_CG3504%09red/dme:Dmel_CG7875%09red/dme:Dmel_CG8770%09red/dme:Dmel_CG6622%09red
Tryptophan metabolism	KEGG PATHWAY	dme00380	6	21	0.000461665	0.00792605	Bta01309|Bta08381|Bta10292|Bta07814|Bta11390|Bta02426	http://www.genome.jp/kegg-bin/show_pathway?dme00380/dme:Dmel_CG5214%09red/dme:Dmel_CG4389%09red/dme:Dmel_CG7430%09red/dme:Dmel_CG3318%09red/dme:Dmel_CG9122%09red

## Sheet: red_GO_KEGG
##Databases: Gene Ontology, KEGG PATHWAY
##Statistical test method: hypergeometric test / Fisher's exact test
##FDR correction method: Benjamini and Hochberg
Term	Database	ID	Input	Total	P-Value	Corrected P-Value	Genes
integral component of plasma membrane	Gene Ontology	GO:0005887	81	304	1.4231e-43	1.70274e-40	Bta06953|Bta01266|Bta04920|Bta06001|Bta14286|Bta08120|Bta07848|Bta04919|Bta01579|Bta15102|Bta07063|Bta07060|Bta11029|Bta14508|Bta03019|Bta14155|Bta15344|Bta13178|Bta11027|Bta01738|Bta12664|Bta15122|Bta15260|Bta06828|Bta03349|Bta08781|Bta08786|Bta07006|Bta03717|Bta11339|Bta03499|Bta06798|Bta09282|Bta14987|Bta09650|Bta02663|Bta10442|Bta05942|Bta05941|Bta06795|Bta10640|Bta02946|Bta08464|Bta00353|Bta…	http://amigo.geneontology.org/amigo/term/GO:0005887
plasma membrane	Gene Ontology	GO:0005886	71	638	5.01272e-18	2.99886e-15	Bta06953|Bta01266|Bta14708|Bta10396|Bta01153|Bta08434|Bta01579|Bta12929|Bta03110|Bta10942|Bta06356|Bta11454|Bta11455|Bta11456|Bta02985|Bta04225|Bta12664|Bta08924|Bta05723|Bta12299|Bta08781|Bta04964|Bta01933|Bta05725|Bta15141|Bta01738|Bta03499|Bta05728|Bta03539|Bta09650|Bta09750|Bta15423|Bta07504|Bta14902|Bta06436|Bta03908|Bta13713|Bta00733|Bta08786|Bta04849|Bta12383|Bta11322|Bta00747|Bta05625|Bta…	http://amigo.geneontology.org/amigo/term/GO:0005886
chemical synaptic transmission	Gene Ontology	GO:0007268	26	76	7.92172e-17	3.15945e-14	Bta14708|Bta03110|Bta11029|Bta14508|Bta14155|Bta11027|Bta11339|Bta09860|Bta09861|Bta03349|Bta08781|Bta08786|Bta11579|Bta02663|Bta10442|Bta08464|Bta06436|Bta00353|Bta06828|Bta06795|Bta09859|Bta04413|Bta10267|Bta10342|Bta02439|Bta08457	http://amigo.geneontology.org/amigo/term/GO:0007268
G protein-coupled amine receptor activity	Gene Ontology	GO:0008227	14	16	7.93837e-14	2.37457e-11	Bta03717|Bta10342|Bta06795|Bta15345|Bta03110|Bta02535|Bta14508|Bta14155|Bta15344|Bta13178|Bta15346|Bta13193|Bta13195|Bta02532	http://amigo.geneontology.org/amigo/term/GO:0008227
synapse	Gene Ontology	GO:0045202	22	75	2.60219e-13	5.59401e-11	Bta05708|Bta12769|Bta11029|Bta14155|Bta11027|Bta11339|Bta00380|Bta06828|Bta03349|Bta08781|Bta08786|Bta15493|Bta02663|Bta00353|Bta08464|Bta10442|Bta03840|Bta07388|Bta15603|Bta04097|Bta10267|Bta08457	http://amigo.geneontology.org/amigo/term/GO:0045202
G protein-coupled receptor signaling pathway	Gene Ontology	GO:0007186	25	104	2.80518e-13	5.59401e-11	Bta03110|Bta13178|Bta15344|Bta15345|Bta15346|Bta01738|Bta12664|Bta06234|Bta03717|Bta07456|Bta05942|Bta05941|Bta13040|Bta07012|Bta05939|Bta11385|Bta14286|Bta10456|Bta02535|Bta10453|Bta02532|Bta06819|Bta13195|Bta11974|Bta13193	http://amigo.geneontology.org/amigo/term/GO:0007186
integral component of membrane	Gene Ontology	GO:0016021	66	760	3.89709e-12	6.66123e-10	Bta15346|Bta14708|Bta07408|Bta01207|Bta08434|Bta04919|Bta07456|Bta12929|Bta15344|Bta14508|Bta03019|Bta14155|Bta11454|Bta11455|Bta11456|Bta05038|Bta01738|Bta12664|Bta01933|Bta03717|Bta11339|Bta11174|Bta12879|Bta02663|Bta13453|Bta05942|Bta05941|Bta15423|Bta01810|Bta13178|Bta12263|Bta09750|Bta04964|Bta07012|Bta06795|Bta01706|Bta13661|Bta12383|Bta15102|Bta11322|Bta13040|Bta05939|Bta06356|Bta04920|Bta…	http://amigo.geneontology.org/amigo/term/GO:0016021
G protein-coupled receptor activity	Gene Ontology	GO:0004930	19	65	1.1739e-11	1.65244e-09	Bta13178|Bta02532|Bta03110|Bta04413|Bta10342|Bta06795|Bta01706|Bta07456|Bta13040|Bta02535|Bta10453|Bta14508|Bta14155|Bta03717|Bta06819|Bta13195|Bta13193|Bta11385|Bta10456	http://amigo.geneontology.org/amigo/term/GO:0004930
synaptic vesicle endocytosis	Gene Ontology	GO:0048488	13	28	2.19344e-10	2.38586e-08	Bta14691|Bta09861|Bta10267|Bta08786|Bta00353|Bta06828|Bta09860|Bta09859|Bta08464|Bta08781|Bta10442|Bta08457|Bta00418	http://amigo.geneontology.org/amigo/term/GO:0048488
homophilic cell adhesion via plasma membrane adhesion molecules	Gene Ontology	GO:0007156	14	36	2.854e-10	2.84568e-08	Bta06953|Bta01266|Bta08119|Bta03499|Bta01496|Bta08120|Bta03501|Bta09650|Bta01153|Bta09647|Bta09648|Bta09649|Bta12664|Bta06001	http://amigo.geneontology.org/amigo/term/GO:0007156
dendrite self-avoidance	Gene Ontology	GO:0070593	10	13	7.39003e-10	6.54976e-08	Bta06953|Bta01266|Bta08119|Bta03499|Bta08120|Bta03501|Bta09650|Bta09647|Bta09648|Bta09649	http://amigo.geneontology.org/amigo/term/GO:0070593
neurotransmitter receptor activity	Gene Ontology	GO:0030594	11	21	2.0549e-09	1.58625e-07	Bta03349|Bta10342|Bta06795|Bta04413|Bta03110|Bta02663|Bta14508|Bta14155|Bta11029|Bta11027|Bta11339	http://amigo.geneontology.org/amigo/term/GO:0030594
identical protein binding	Gene Ontology	GO:0042802	10	21	2.27877e-08	1.60385e-06	Bta06953|Bta01266|Bta08119|Bta03499|Bta08120|Bta03501|Bta09650|Bta09647|Bta09648|Bta09649	http://amigo.geneontology.org/amigo/term/GO:0042802
axon	Gene Ontology	GO:0030424	19	121	9.33297e-08	6.20383e-06	Bta06953|Bta14951|Bta01266|Bta08119|Bta04886|Bta07801|Bta03499|Bta07848|Bta08120|Bta03501|Bta05708|Bta08934|Bta09650|Bta09647|Bta09648|Bta09649|Bta07388|Bta10942|Bta03975	http://amigo.geneontology.org/amigo/term/GO:0030424
synapse organization	Gene Ontology	GO:0050808	13	52	1.01795e-07	6.41038e-06	Bta09860|Bta13027|Bta08781|Bta08786|Bta09861|Bta14824|Bta02938|Bta13127|Bta14987|Bta01579|Bta09859|Bta02937|Bta15260	http://amigo.geneontology.org/amigo/term/GO:0050808
modulation of chemical synaptic transmission	Gene Ontology	GO:0050804	9	19	1.21083e-07	7.01602e-06	Bta06828|Bta08781|Bta08786|Bta00353|Bta08464|Bta10267|Bta10442|Bta08457|Bta08924	http://amigo.geneontology.org/amigo/term/GO:0050804
neuromuscular junction	Gene Ontology	GO:0031594	13	53	1.23139e-07	7.01602e-06	Bta14691|Bta09861|Bta14587|Bta08781|Bta08786|Bta10396|Bta00733|Bta09859|Bta11579|Bta05625|Bta09860|Bta06436|Bta07388	http://amigo.geneontology.org/amigo/term/GO:0031594
axon guidance	Gene Ontology	GO:0007411	20	138	1.39002e-07	7.5598e-06	Bta04203|Bta03501|Bta06953|Bta01266|Bta06799|Bta08119|Bta06798|Bta15766|Bta03499|Bta07848|Bta08120|Bta11674|Bta09650|Bta03657|Bta09647|Bta09648|Bta09649|Bta07388|Bta07149|Bta10640	http://amigo.geneontology.org/amigo/term/GO:0007411
olfactory behavior	Gene Ontology	GO:0042048	11	38	2.84586e-07	1.48046e-05	Bta05723|Bta05939|Bta05726|Bta05725|Bta05724|Bta14286|Bta05728|Bta08434|Bta05942|Bta05941|Bta11974	http://amigo.geneontology.org/amigo/term/GO:0042048
adenylate cyclase-inhibiting G protein-coupled receptor signaling pathway	Gene Ontology	GO:0007193	8	15	3.09705e-07	1.54401e-05	Bta07012|Bta05939|Bta07006|Bta13040|Bta05942|Bta05941|Bta13193|Bta13195	http://amigo.geneontology.org/amigo/term/GO:0007193
signaling receptor activity	Gene Ontology	GO:0038023	11	39	3.54527e-07	1.63151e-05	Bta06828|Bta08781|Bta08786|Bta01933|Bta05793|Bta08464|Bta10267|Bta10442|Bta00353|Bta08457|Bta08924	http://amigo.geneontology.org/amigo/term/GO:0038023
cell adhesion	Gene Ontology	GO:0007155	11	39	3.54527e-07	1.63151e-05	Bta14655|Bta02014|Bta06953|Bta01266|Bta03499|Bta12316|Bta12317|Bta09650|Bta09648|Bta09649|Bta12318	http://amigo.geneontology.org/amigo/term/GO:0007155
postsynaptic membrane	Gene Ontology	GO:0045211	10	31	4.32925e-07	1.8762e-05	Bta03349|Bta08781|Bta08786|Bta06436|Bta11029|Bta12948|Bta02663|Bta11027|Bta11339|Bta08924	http://amigo.geneontology.org/amigo/term/GO:0045211
sodium ion transmembrane transport	Gene Ontology	GO:0035725	9	23	4.39061e-07	1.8762e-05	Bta05723|Bta05725|Bta15423|Bta05724|Bta05728|Bta12929|Bta08635|Bta04252|Bta05726	http://amigo.geneontology.org/amigo/term/GO:0035725
neuropeptide receptor activity	Gene Ontology	GO:0008188	10	32	5.52238e-07	2.27846e-05	Bta10456|Bta14286|Bta13040|Bta10453|Bta15345|Bta15344|Bta06819|Bta15346|Bta11974|Bta01738	http://amigo.geneontology.org/amigo/term/GO:0008188
negative regulation of neuromuscular synaptic transmission	Gene Ontology	GO:1900074	6	6	7.70535e-07	3.02277e-05	Bta05625|Bta06799|Bta06798|Bta10396|Bta00733|Bta10640	http://amigo.geneontology.org/amigo/term/GO:1900074
cell surface	Gene Ontology	GO:0009986	11	44	9.83856e-07	3.73709e-05	Bta06828|Bta08781|Bta08786|Bta07544|Bta08464|Bta10267|Bta10442|Bta00353|Bta10017|Bta07388|Bta08457	http://amigo.geneontology.org/amigo/term/GO:0009986
adenylate cyclase-modulating G protein-coupled receptor signaling pathway	Gene Ontology	GO:0007188	8	19	1.25369e-06	4.61549e-05	Bta06234|Bta03717|Bta13193|Bta02535|Bta02532|Bta13178|Bta13195|Bta01738	http://amigo.geneontology.org/amigo/term/GO:0007188
G protein-coupled receptor signaling pathway, coupled to cyclic nucleotide second messenger	Gene Ontology	GO:0007187	6	7	1.39267e-06	4.82995e-05	Bta10342|Bta06795|Bta04413|Bta03110|Bta14508|Bta14155	http://amigo.geneontology.org/amigo/term/GO:0007187
G protein-coupled serotonin receptor activity	Gene Ontology	GO:0004993	6	7	1.39267e-06	4.82995e-05	Bta10342|Bta06795|Bta04413|Bta03110|Bta14508|Bta14155	http://amigo.geneontology.org/amigo/term/GO:0004993
neuron projection	Gene Ontology	GO:0043005	13	68	1.46378e-06	4.93356e-05	Bta13027|Bta03349|Bta06436|Bta14987|Bta03501|Bta09282|Bta11029|Bta01831|Bta01153|Bta02663|Bta11027|Bta11339|Bta15260	http://amigo.geneontology.org/amigo/term/GO:0043005
presynaptic membrane	Gene Ontology	GO:0042734	8	21	2.29189e-06	7.17365e-05	Bta04097|Bta14587|Bta05625|Bta06436|Bta15493|Bta10396|Bta00733|Bta12769	http://amigo.geneontology.org/amigo/term/GO:0042734
voltage-gated cation channel activity	Gene Ontology	GO:0022843	6	8	2.37195e-06	7.17365e-05	Bta05723|Bta05726|Bta05725|Bta05724|Bta05728|Bta02946	http://amigo.geneontology.org/amigo/term/GO:0022843
chitin-based embryonic cuticle biosynthetic process	Gene Ontology	GO:0008362	7	14	2.42819e-06	7.17365e-05	Bta02014|Bta06864|Bta06862|Bta03601|Bta10969|Bta06251|Bta03021	http://amigo.geneontology.org/amigo/term/GO:0008362
hormone-mediated signaling pathway	Gene Ontology	GO:0009755	7	14	2.42819e-06	7.17365e-05	Bta10456|Bta10453|Bta15344|Bta15345|Bta15346|Bta01738|Bta09497	http://amigo.geneontology.org/amigo/term/GO:0009755
regulation of membrane potential	Gene Ontology	GO:0042391	9	30	2.7216e-06	7.84674e-05	Bta02946|Bta03349|Bta15493|Bta12769|Bta04097|Bta11029|Bta02663|Bta11027|Bta11339	http://amigo.geneontology.org/amigo/term/GO:0042391
calcium ion binding	Gene Ontology	GO:0005509	19	157	3.28712e-06	9.25421e-05	Bta06864|Bta15686|Bta13272|Bta06001|Bta10396|Bta11798|Bta00733|Bta05625|Bta06862|Bta04026|Bta00026|Bta11579|Bta08635|Bta00030|Bta06436|Bta05996|Bta09540|Bta10449|Bta00029	http://amigo.geneontology.org/amigo/term/GO:0005509
adenylate cyclase-activating adrenergic receptor signaling pathway	Gene Ontology	GO:0071880	6	9	3.84751e-06	0.000105829	Bta03717|Bta02535|Bta02532|Bta13178|Bta13195|Bta13193	http://amigo.geneontology.org/amigo/term/GO:0071880
transmembrane signaling receptor activity	Gene Ontology	GO:0004888	8	23	3.98329e-06	0.000107101	Bta07012|Bta03349|Bta05939|Bta03021|Bta02663|Bta05942|Bta05941|Bta11339	http://amigo.geneontology.org/amigo/term/GO:0004888
potassium ion transmembrane transport	Gene Ontology	GO:0071805	8	25	6.62961e-06	0.000170588	Bta15102|Bta03019|Bta04964|Bta14708|Bta10978|Bta02946|Bta04920|Bta04919	http://amigo.geneontology.org/amigo/term/GO:0071805
positive regulation of kinase activity	Gene Ontology	GO:0033674	7	18	8.98966e-06	0.000221776	Bta06145|Bta06799|Bta06798|Bta06001|Bta07848|Bta13641|Bta10640	http://amigo.geneontology.org/amigo/term/GO:0033674
transmembrane receptor protein tyrosine kinase activity	Gene Ontology	GO:0004714	7	18	8.98966e-06	0.000221776	Bta06145|Bta06799|Bta06798|Bta06001|Bta07848|Bta13641|Bta10640	http://amigo.geneontology.org/amigo/term/GO:0004714
transmembrane receptor protein tyrosine kinase signaling pathway	Gene Ontology	GO:0007169	8	27	1.06279e-05	0.000256895	Bta06145|Bta06799|Bta06798|Bta06001|Bta07848|Bta13754|Bta13641|Bta10640	http://amigo.geneontology.org/amigo/term/GO:0007169
regulation of heart contraction	Gene Ontology	GO:0008016	5	7	2.058e-05	0.00046026	Bta12316|Bta07801|Bta08434|Bta12318|Bta12317	http://amigo.geneontology.org/amigo/term/GO:0008016
acetylcholine-gated cation-selective channel activity	Gene Ontology	GO:0022848	5	7	2.058e-05	0.00046026	Bta11029|Bta11027|Bta02663|Bta03349|Bta11339	http://amigo.geneontology.org/amigo/term/GO:0022848
acetylcholine-gated channel complex	Gene Ontology	GO:0005892	5	7	2.058e-05	0.00046026	Bta11029|Bta11027|Bta02663|Bta03349|Bta11339	http://amigo.geneontology.org/amigo/term/GO:0005892
G protein-coupled peptide receptor activity	Gene Ontology	GO:0008528	6	14	2.60247e-05	0.000571349	Bta10456|Bta10453|Bta15344|Bta15345|Bta15346|Bta01738	http://amigo.geneontology.org/amigo/term/GO:0008528
dendrite	Gene Ontology	GO:0030425	13	92	2.72185e-05	0.000586793	Bta02014|Bta01706|Bta04413|Bta04886|Bta10342|Bta06795|Bta15439|Bta03501|Bta05708|Bta03110|Bta14508|Bta14155|Bta08934	http://amigo.geneontology.org/amigo/term/GO:0030425
presynaptic active zone	Gene Ontology	GO:0048786	7	23	3.31772e-05	0.000702593	Bta04097|Bta06436|Bta15493|Bta11579|Bta12769|Bta03840|Bta08924	http://amigo.geneontology.org/amigo/term/GO:0048786
potassium channel activity	Gene Ontology	GO:0005267	5	9	4.93498e-05	0.00102691	Bta10978|Bta15102|Bta04919|Bta03019|Bta04920	http://amigo.geneontology.org/amigo/term/GO:0005267
receptor complex	Gene Ontology	GO:0043235	7	25	5.19197e-05	0.00106191	Bta06145|Bta06799|Bta06798|Bta06001|Bta07848|Bta13641|Bta10640	http://amigo.geneontology.org/amigo/term/GO:0043235
signal transduction	Gene Ontology	GO:0007165	12	85	5.55595e-05	0.00111726	Bta03349|Bta05625|Bta10396|Bta13547|Bta00733|Bta05793|Bta02663|Bta11029|Bta00905|Bta11027|Bta11339|Bta03012	http://amigo.geneontology.org/amigo/term/GO:0007165
neuromuscular synaptic transmission	Gene Ontology	GO:0007274	9	48	6.95892e-05	0.00137625	Bta14691|Bta09861|Bta08781|Bta08786|Bta04097|Bta15493|Bta09859|Bta09860|Bta00627	http://amigo.geneontology.org/amigo/term/GO:0007274
potassium ion leak channel activity	Gene Ontology	GO:0022841	5	10	7.2101e-05	0.00140275	Bta10978|Bta15102|Bta04919|Bta03019|Bta04920	http://amigo.geneontology.org/amigo/term/GO:0022841
cation transport	Gene Ontology	GO:0006812	7	27	7.85494e-05	0.00150375	Bta11339|Bta15006|Bta08367|Bta02663|Bta07073|Bta08368|Bta08369	http://amigo.geneontology.org/amigo/term/GO:0006812
regulation of terminal button organization	Gene Ontology	GO:2000331	6	19	0.0001039	0.00194244	Bta14691|Bta09860|Bta08781|Bta08786|Bta09861|Bta09859	http://amigo.geneontology.org/amigo/term/GO:2000331
cation channel activity	Gene Ontology	GO:0005261	6	20	0.00013148	0.00242024	Bta05723|Bta05726|Bta05725|Bta05724|Bta05728|Bta08635	http://amigo.geneontology.org/amigo/term/GO:0005261
stabilization of membrane potential	Gene Ontology	GO:0030322	5	12	0.000140959	0.00255541	Bta10978|Bta15102|Bta04919|Bta03019|Bta04920	http://amigo.geneontology.org/amigo/term/GO:0030322
sarcomere organization	Gene Ontology	GO:0045214	7	31	0.000165134	0.002949	Bta03908|Bta13713|Bta13754|Bta05261|Bta12316|Bta12317|Bta12318	http://amigo.geneontology.org/amigo/term/GO:0045214
tissue development	Gene Ontology	GO:0009888	5	13	0.000190113	0.00329667	Bta00026|Bta12277|Bta00030|Bta00029|Bta09497	http://amigo.geneontology.org/amigo/term/GO:0009888
associative learning	Gene Ontology	GO:0008306	5	13	0.000190113	0.00329667	Bta09859|Bta09861|Bta04413|Bta09860|Bta14708	http://amigo.geneontology.org/amigo/term/GO:0008306
synaptic transmission, cholinergic	Gene Ontology	GO:0007271	4	7	0.000274698	0.00460327	Bta11339|Bta11027|Bta11029|Bta03349	http://amigo.geneontology.org/amigo/term/GO:0007271
adult locomotory behavior	Gene Ontology	GO:0008344	8	46	0.000277004	0.00460327	Bta14691|Bta13040|Bta11579|Bta13284|Bta08934|Bta09274|Bta03975|Bta09273	http://amigo.geneontology.org/amigo/term/GO:0008344
motor neuron axon guidance	Gene Ontology	GO:0008045	9	60	0.000313142	0.00513252	Bta12277|Bta03908|Bta13713|Bta14484|Bta15766|Bta08934|Bta07388|Bta06913|Bta11376	http://amigo.geneontology.org/amigo/term/GO:0008045
nervous system process	Gene Ontology	GO:0050877	5	15	0.000326426	0.00520759	Bta11029|Bta11027|Bta02663|Bta03349|Bta11339	http://amigo.geneontology.org/amigo/term/GO:0050877
negative regulation of cell size	Gene Ontology	GO:0045792	5	15	0.000326426	0.00520759	Bta06001|Bta12020|Bta10640|Bta06799|Bta06798	http://amigo.geneontology.org/amigo/term/GO:0045792
neuromuscular junction development	Gene Ontology	GO:0007528	7	36	0.000367749	0.00575179	Bta06828|Bta10267|Bta06436|Bta10396|Bta00733|Bta05625|Bta00353	http://amigo.geneontology.org/amigo/term/GO:0007528
cytoskeleton of presynaptic active zone	Gene Ontology	GO:0048788	4	8	0.000401757	0.00597146	Bta04097|Bta12769|Bta00627|Bta15493	http://amigo.geneontology.org/amigo/term/GO:0048788
regulation of neuromuscular synaptic transmission	Gene Ontology	GO:1900073	4	8	0.000401757	0.00597146	Bta14691|Bta09859|Bta09860|Bta09861	http://amigo.geneontology.org/amigo/term/GO:1900073
regulation of olfactory learning	Gene Ontology	GO:0090328	4	8	0.000401757	0.00597146	Bta04413|Bta10640|Bta06799|Bta06798	http://amigo.geneontology.org/amigo/term/GO:0090328
positive regulation of MAPK cascade	Gene Ontology	GO:0043410	4	8	0.000401757	0.00597146	Bta07848|Bta10640|Bta06799|Bta06798	http://amigo.geneontology.org/amigo/term/GO:0043410
thermotaxis	Gene Ontology	GO:0043052	5	16	0.000417352	0.00611607	Bta04413|Bta04886|Bta08434|Bta13729|Bta03975	http://amigo.geneontology.org/amigo/term/GO:0043052
terminal bouton	Gene Ontology	GO:0043195	7	38	0.000490358	0.00706884	Bta09860|Bta09861|Bta05625|Bta06436|Bta10396|Bta00733|Bta09859	http://amigo.geneontology.org/amigo/term/GO:0043195
ion transmembrane transport	Gene Ontology	GO:0034220	5	17	0.000526143	0.00749441	Bta11029|Bta11027|Bta02663|Bta03349|Bta11339	http://amigo.geneontology.org/amigo/term/GO:0034220
protein O-linked mannosylation	Gene Ontology	GO:0035269	4	9	0.00056584	0.00787241	Bta09882|Bta03820|Bta00205|Bta12717	http://amigo.geneontology.org/amigo/term/GO:0035269
cGMP-mediated signaling	Gene Ontology	GO:0019934	4	9	0.00056584	0.00787241	Bta11701|Bta12987|Bta05793|Bta07073	http://amigo.geneontology.org/amigo/term/GO:0019934
apical plasma membrane	Gene Ontology	GO:0016324	8	52	0.00057698	0.00793513	Bta12299|Bta11174|Bta01496|Bta11579|Bta09750|Bta11880|Bta05776|Bta08572	http://amigo.geneontology.org/amigo/term/GO:0016324
amino acid transmembrane transport	Gene Ontology	GO:0003333	6	28	0.000619508	0.00842319	Bta14902|Bta15423|Bta09729|Bta08771|Bta09730|Bta09598	http://amigo.geneontology.org/amigo/term/GO:0003333
multicellular organism development	Gene Ontology	GO:0007275	7	40	0.000643503	0.00865114	Bta06145|Bta06799|Bta06798|Bta06001|Bta07848|Bta13641|Bta10640	http://amigo.geneontology.org/amigo/term/GO:0007275
liquid clearance, open tracheal system	Gene Ontology	GO:0035002	5	18	0.000654932	0.00870696	Bta03021|Bta05776|Bta03601|Bta12307|Bta08631	http://amigo.geneontology.org/amigo/term/GO:0035002
apposition of dorsal and ventral imaginal disc-derived wing surfaces	Gene Ontology	GO:0007475	6	29	0.000727917	0.00957091	Bta06864|Bta06862|Bta12316|Bta12317|Bta10969|Bta12318	http://amigo.geneontology.org/amigo/term/GO:0007475
extracellular matrix	Gene Ontology	GO:0031012	12	116	0.000762642	0.00962729	Bta13863|Bta06864|Bta02985|Bta15477|Bta06862|Bta08485|Bta00026|Bta05839|Bta00030|Bta09550|Bta09584|Bta00029	http://amigo.geneontology.org/amigo/term/GO:0031012
response to reactive oxygen species	Gene Ontology	GO:0000302	4	10	0.000772436	0.00962729	Bta11106|Bta11107|Bta06484|Bta12987	http://amigo.geneontology.org/amigo/term/GO:0000302
carbohydrate homeostasis	Gene Ontology	GO:0033500	4	10	0.000772436	0.00962729	Bta11106|Bta11107|Bta08771|Bta07848	http://amigo.geneontology.org/amigo/term/GO:0033500
type I terminal bouton	Gene Ontology	GO:0061174	4	10	0.000772436	0.00962729	Bta14691|Bta09859|Bta09860|Bta09861	http://amigo.geneontology.org/amigo/term/GO:0061174
cuticle development	Gene Ontology	GO:0042335	4	10	0.000772436	0.00962729	Bta13656|Bta15475|Bta11798|Bta11834	http://amigo.geneontology.org/amigo/term/GO:0042335
mesodermal cell migration	Gene Ontology	GO:0008078	4	11	0.0010271	0.0125258	Bta12316|Bta12317|Bta12318|Bta15477	http://amigo.geneontology.org/amigo/term/GO:0008078
open tracheal system development	Gene Ontology	GO:0007424	9	72	0.00103117	0.0125258	Bta06864|Bta06862|Bta03601|Bta07848|Bta06251|Bta01831|Bta01153|Bta10017|Bta03021	http://amigo.geneontology.org/amigo/term/GO:0007424
neuron projection membrane	Gene Ontology	GO:0032589	5	21	0.00118382	0.0141523	Bta14824|Bta02938|Bta02937|Bta13127|Bta01579	http://amigo.geneontology.org/amigo/term/GO:0032589
regulation of GTPase activity	Gene Ontology	GO:0043087	7	45	0.00119464	0.0141523	Bta11777|Bta05261|Bta15603|Bta03981|Bta00380|Bta02985|Bta06733	http://amigo.geneontology.org/amigo/term/GO:0043087
R3/R4 cell fate commitment	Gene Ontology	GO:0007464	4	12	0.00133542	0.0152174	Bta11674|Bta12929|Bta12664|Bta03657	http://amigo.geneontology.org/amigo/term/GO:0007464
response to mechanical stimulus	Gene Ontology	GO:0009612	4	12	0.00133542	0.0152174	Bta03907|Bta08635|Bta08434|Bta03906	http://amigo.geneontology.org/amigo/term/GO:0009612
positive regulation of Rho protein signal transduction	Gene Ontology	GO:0035025	4	12	0.00133542	0.0152174	Bta04203|Bta14587|Bta12020|Bta14499	http://amigo.geneontology.org/amigo/term/GO:0035025
male courtship behavior, veined wing generated song production	Gene Ontology	GO:0045433	4	12	0.00133542	0.0152174	Bta11579|Bta08635|Bta08786|Bta08781	http://amigo.geneontology.org/amigo/term/GO:0045433
nucleoside transmembrane transporter activity	Gene Ontology	GO:0005337	3	5	0.00156924	0.017147	Bta11454|Bta11455|Bta11456	http://amigo.geneontology.org/amigo/term/GO:0005337
cellular response to mechanical stimulus	Gene Ontology	GO:0071260	3	5	0.00156924	0.017147	Bta05942|Bta05941|Bta05939	http://amigo.geneontology.org/amigo/term/GO:0071260
visceral muscle development	Gene Ontology	GO:0007522	3	5	0.00156924	0.017147	Bta10640|Bta06799|Bta06798	http://amigo.geneontology.org/amigo/term/GO:0007522
nucleoside transmembrane transport	Gene Ontology	GO:1901642	3	5	0.00156924	0.017147	Bta11454|Bta11455|Bta11456	http://amigo.geneontology.org/amigo/term/GO:1901642
adenylate cyclase-activating G protein-coupled receptor signaling pathway	Gene Ontology	GO:0007189	5	23	0.00167886	0.0181787	Bta10456|Bta02535|Bta10453|Bta02532|Bta07006	http://amigo.geneontology.org/amigo/term/GO:0007189
amino acid transmembrane transporter activity	Gene Ontology	GO:0015171	5	24	0.00197648	0.021021	Bta09730|Bta14902|Bta09598|Bta09729|Bta15423	http://amigo.geneontology.org/amigo/term/GO:0015171
axon extension	Gene Ontology	GO:0048675	5	24	0.00197648	0.021021	Bta10396|Bta05625|Bta00733|Bta12664|Bta04886	http://amigo.geneontology.org/amigo/term/GO:0048675
small GTPase mediated signal transduction	Gene Ontology	GO:0007264	4	14	0.00213519	0.0222981	Bta15142|Bta00380|Bta15603|Bta15141	http://amigo.geneontology.org/amigo/term/GO:0007264
growth factor activity	Gene Ontology	GO:0008083	4	14	0.00213519	0.0222981	Bta15766|Bta01572|Bta11821|Bta13109	http://amigo.geneontology.org/amigo/term/GO:0008083
regulation of transcription, DNA-templated	Gene Ontology	GO:0006355	18	249	0.00220667	0.0222981	Bta11674|Bta07149|Bta06864|Bta03637|Bta09869|Bta06862|Bta11168|Bta03465|Bta01965|Bta11334|Bta03471|Bta11677|Bta03657|Bta15331|Bta09809|Bta03246|Bta09497|Bta15509	http://amigo.geneontology.org/amigo/term/GO:0006355
type Ib terminal bouton	Gene Ontology	GO:0061176	3	6	0.0022987	0.0222981	Bta10640|Bta06799|Bta06798	http://amigo.geneontology.org/amigo/term/GO:0061176
regulation of embryonic development	Gene Ontology	GO:0045995	3	6	0.0022987	0.0222981	Bta12316|Bta12317|Bta12318	http://amigo.geneontology.org/amigo/term/GO:0045995
social behavior	Gene Ontology	GO:0035176	3	6	0.0022987	0.0222981	Bta08786|Bta08781|Bta10138	http://amigo.geneontology.org/amigo/term/GO:0035176
ion channel binding	Gene Ontology	GO:0044325	3	6	0.0022987	0.0222981	Bta04097|Bta12769|Bta15493	http://amigo.geneontology.org/amigo/term/GO:0044325
locomotion	Gene Ontology	GO:0040011	5	25	0.00231088	0.0222981	Bta14691|Bta09859|Bta05839|Bta09860|Bta09861	http://amigo.geneontology.org/amigo/term/GO:0040011
mesoderm development	Gene Ontology	GO:0007498	7	52	0.00251917	0.0240174	Bta05523|Bta06799|Bta06798|Bta12316|Bta12317|Bta10640|Bta12318	http://amigo.geneontology.org/amigo/term/GO:0007498
animal organ morphogenesis	Gene Ontology	GO:0009887	4	15	0.00263755	0.0246549	Bta00026|Bta12277|Bta00030|Bta00029	http://amigo.geneontology.org/amigo/term/GO:0009887
response to insecticide	Gene Ontology	GO:0017085	4	15	0.00263755	0.0246549	Bta11339|Bta11027|Bta01706|Bta11029	http://amigo.geneontology.org/amigo/term/GO:0017085
muscle attachment	Gene Ontology	GO:0016203	5	26	0.00268459	0.0247086	Bta12316|Bta12317|Bta10942|Bta12318|Bta05261	http://amigo.geneontology.org/amigo/term/GO:0016203
synaptic growth at neuromuscular junction	Gene Ontology	GO:0051124	5	26	0.00268459	0.0247086	Bta09859|Bta09861|Bta08781|Bta08786|Bta09860	http://amigo.geneontology.org/amigo/term/GO:0051124
regulation of neuron differentiation	Gene Ontology	GO:0045664	3	7	0.00320702	0.0284973	Bta10640|Bta06799|Bta06798	http://amigo.geneontology.org/amigo/term/GO:0045664
maintenance of presynaptic active zone structure	Gene Ontology	GO:0048790	3	7	0.00320702	0.0284973	Bta03840|Bta08781|Bta08786	http://amigo.geneontology.org/amigo/term/GO:0048790
axon ensheathment	Gene Ontology	GO:0008366	3	7	0.00320702	0.0284973	Bta12316|Bta12317|Bta12318	http://amigo.geneontology.org/amigo/term/GO:0008366
dendrite morphogenesis	Gene Ontology	GO:0048813	9	87	0.00337829	0.0297215	Bta02014|Bta00941|Bta13302|Bta13300|Bta10377|Bta03471|Bta03465|Bta11674|Bta03657	http://amigo.geneontology.org/amigo/term/GO:0048813
synaptic target recognition	Gene Ontology	GO:0008039	5	29	0.00406722	0.0353922	Bta10396|Bta05625|Bta00733|Bta10969|Bta04371	http://amigo.geneontology.org/amigo/term/GO:0008039
Toll binding	Gene Ontology	GO:0005121	3	8	0.00430664	0.0361606	Bta15766|Bta01572|Bta11821	http://amigo.geneontology.org/amigo/term/GO:0005121
morphogenesis of embryonic epithelium	Gene Ontology	GO:0016331	3	8	0.00430664	0.0361606	Bta11174|Bta01153|Bta08572	http://amigo.geneontology.org/amigo/term/GO:0016331
trachea morphogenesis	Gene Ontology	GO:0060439	3	8	0.00430664	0.0361606	Bta10017|Bta03601|Bta11275	http://amigo.geneontology.org/amigo/term/GO:0060439
oenocyte development	Gene Ontology	GO:0007438	3	8	0.00430664	0.0361606	Bta12316|Bta12317|Bta12318	http://amigo.geneontology.org/amigo/term/GO:0007438
regulation of Toll signaling pathway	Gene Ontology	GO:0008592	3	8	0.00430664	0.0361606	Bta15766|Bta01572|Bta11821	http://amigo.geneontology.org/amigo/term/GO:0008592
basement membrane	Gene Ontology	GO:0005604	4	18	0.00461757	0.0382348	Bta00026|Bta12277|Bta00030|Bta00029	http://amigo.geneontology.org/amigo/term/GO:0005604
Rho guanyl-nucleotide exchange factor activity	Gene Ontology	GO:0005089	4	18	0.00461757	0.0382348	Bta04203|Bta14587|Bta12020|Bta14499	http://amigo.geneontology.org/amigo/term/GO:0005089
Rab GTPase binding	Gene Ontology	GO:0017137	7	59	0.00475919	0.0387592	Bta04097|Bta15493|Bta12769|Bta03981|Bta06733|Bta00418|Bta08572	http://amigo.geneontology.org/amigo/term/GO:0017137
apical part of cell	Gene Ontology	GO:0045177	6	44	0.00477809	0.0387592	Bta12799|Bta06001|Bta03601|Bta10969|Bta08631|Bta14951	http://amigo.geneontology.org/amigo/term/GO:0045177
sodium ion transport	Gene Ontology	GO:0006814	6	44	0.00477809	0.0387592	Bta05723|Bta05726|Bta05725|Bta05724|Bta13258|Bta05728	http://amigo.geneontology.org/amigo/term/GO:0006814
DNA-binding transcription factor activity, RNA polymerase II-specific	Gene Ontology	GO:0000981	13	167	0.0048887	0.0393894	Bta02014|Bta03637|Bta05523|Bta13302|Bta09938|Bta13300|Bta01965|Bta01831|Bta09274|Bta15808|Bta13157|Bta09273|Bta15509	http://amigo.geneontology.org/amigo/term/GO:0000981
long-term memory	Gene Ontology	GO:0007616	7	60	0.00517297	0.0411878	Bta14691|Bta02014|Bta01933|Bta13713|Bta05708|Bta03889|Bta03908	http://amigo.geneontology.org/amigo/term/GO:0007616
positive regulation of synaptic growth at neuromuscular junction	Gene Ontology	GO:0045887	5	31	0.00523238	0.0411878	Bta10396|Bta05625|Bta00733|Bta11579|Bta07388	http://amigo.geneontology.org/amigo/term/GO:0045887
lumen formation, open tracheal system	Gene Ontology	GO:0035149	5	31	0.00523238	0.0411878	Bta03601|Bta03021|Bta08572|Bta11275|Bta08631	http://amigo.geneontology.org/amigo/term/GO:0035149
defense response to fungus	Gene Ontology	GO:0050832	6	45	0.00527353	0.0412404	Bta09256|Bta08771|Bta11798|Bta09750|Bta04371|Bta07149	http://amigo.geneontology.org/amigo/term/GO:0050832
neuron cellular homeostasis	Gene Ontology	GO:0070050	4	19	0.00545181	0.0420708	Bta10396|Bta05625|Bta00733|Bta11579	http://amigo.geneontology.org/amigo/term/GO:0070050
regulation of imaginal disc-derived wing size	Gene Ontology	GO:0044719	3	9	0.00560826	0.0420708	Bta06864|Bta06862|Bta08864	http://amigo.geneontology.org/amigo/term/GO:0044719
central nervous system formation	Gene Ontology	GO:0021556	3	9	0.00560826	0.0420708	Bta15766|Bta01572|Bta11821	http://amigo.geneontology.org/amigo/term/GO:0021556
GDP binding	Gene Ontology	GO:0019003	3	9	0.00560826	0.0420708	Bta15142|Bta04849|Bta15141	http://amigo.geneontology.org/amigo/term/GO:0019003
cGMP biosynthetic process	Gene Ontology	GO:0006182	3	9	0.00560826	0.0420708	Bta05591|Bta12987|Bta05793	http://amigo.geneontology.org/amigo/term/GO:0006182
carbohydrate metabolic process	Gene Ontology	GO:0005975	7	62	0.00608085	0.0451909	Bta09256|Bta04042|Bta13746|Bta05309|Bta13982|Bta10017|Bta12131	http://amigo.geneontology.org/amigo/term/GO:0005975
neurotransmitter secretion	Gene Ontology	GO:0007269	6	47	0.00637569	0.0462718	Bta14691|Bta04097|Bta06436|Bta15493|Bta11579|Bta03840	http://amigo.geneontology.org/amigo/term/GO:0007269
short-term memory	Gene Ontology	GO:0007614	4	20	0.00638099	0.0462718	Bta10396|Bta05625|Bta00733|Bta04365	http://amigo.geneontology.org/amigo/term/GO:0007614
regulation of neurotransmitter secretion	Gene Ontology	GO:0046928	3	10	0.00712099	0.0498261	Bta14691|Bta14587|Bta11579	http://amigo.geneontology.org/amigo/term/GO:0046928
regulation of adult chitin-containing cuticle pigmentation	Gene Ontology	GO:0048082	3	10	0.00712099	0.0498261	Bta03975|Bta11834|Bta15727	http://amigo.geneontology.org/amigo/term/GO:0048082
guanylate cyclase activity	Gene Ontology	GO:0004383	3	10	0.00712099	0.0498261	Bta05591|Bta12987|Bta05793	http://amigo.geneontology.org/amigo/term/GO:0004383
regulation of tube diameter, open tracheal system	Gene Ontology	GO:0035158	3	10	0.00712099	0.0498261	Bta03021|Bta06251|Bta03601	http://amigo.geneontology.org/amigo/term/GO:0035158
Neuroactive ligand-receptor interaction	KEGG PATHWAY	dme04080	17	56	8.71413e-11	1.1585e-08	Bta07012|Bta05939|Bta01933|Bta03717|Bta14286|Bta06795|Bta14155|Bta14660|Bta03110|Bta04413|Bta06504|Bta14508|Bta10342|Bta05942|Bta05941|Bta01738|Bta12589	http://www.genome.jp/kegg-bin/show_pathway?dme04080/dme:Dmel_CG15113%09red/dme:Dmel_CG10537%09red/dme:Dmel_CG15274%09red/dme:Dmel_CG1056%09red/dme:Dmel_CG33517%09red/dme:Dmel_CG18741%09red/dme:Dmel_CG6706%09red/dme:Dmel_CG42796%09red/dme:Dmel_CG9652%09red/dme:Dmel_CG12370%09red/dme:Dmel_CG7887%09red/dme:Dmel_CG12073%09red/dme:Dmel_CG4356%09red/dme:Dmel_CG33513%09red
