# Supplementary material for: Whitefly Network Analysis Reveals Gene Modules Involved in Host Plant Selection, Development and Evolution
Source: Front Physiol. 2021 Apr 13;12:656649. doi: 10.3389/fphys.2021.656649 (PMC8076899; doi:10.3389/fphys.2021.656649)
Supplement: Supplementary file 5 [file Table_3.xlsx]

## Sheet: midgunt
	log2(FoldChange)	FDR
Bta07453	17.1883	0
Bta12381	17.1207	0
Bta07114	15.9141	1.11022e-16
Bta08300	15.4642	1.11022e-16
Bta01722	15.0699	1.11022e-15
Bta11419	15.0401	1.22125e-15
Bta03880	14.8601	6.66134e-16
Bta11871	14.8019	5.55112e-16
Bta20004	14.7403	6.66134e-16
Bta14751	14.5302	3.10862e-15
Bta11922	14.4106	4.32987e-15
Bta07749	14.3679	4.88498e-15
Bta03996	13.9321	7.21645e-15
Bta13887	13.8792	1.44329e-14
Bta13075	13.658	6.75016e-14
Bta14721	13.6018	3.23075e-14
Bta10766	13.5515	1.92069e-14
Bta07788	13.4774	4.62963e-14
Bta12531	13.4405	7.03881e-14
Bta07276	13.1901	5.85088e-14
Bta12414	13.181	7.86038e-14
Bta06941	12.8096	2.61124e-13
Bta01866	12.7877	8.3078e-13
Bta03971	12.6688	3.44502e-13
Bta01281	12.4369	6.1473e-13
Bta13700	12.4157	9.88765e-13
Bta15649	12.2044	1.07347e-12
Bta12738	12.0639	2.24643e-12
Bta20006	11.9596	9.05809e-12
Bta11921	11.9272	5.54801e-12
Bta11358	11.887	6.23113e-12
Bta14666	11.8411	7.11353e-12
Bta01580	11.7851	1.49822e-11
Bta03180	11.7622	3.84415e-12
Bta08951	11.615	5.87796e-12
Bta11384	11.5274	7.29838e-12
Bta09313	11.4398	1.65074e-11
Bta03520	11.3631	5.0567e-11
Bta08899	11.3533	1.20586e-11
Bta11983	11.3198	5.72951e-11
Bta08693	11.3065	3.32289e-11
Bta05758	11.283	1.9081e-11
Bta04552	11.1551	9.20976e-11
Bta05669	11.1506	1.95653e-11
Bta09309	11.1193	2.12825e-11
Bta02603	11.0844	2.47444e-11
Bta11843	11.0708	4.78293e-11
Bta05554	11.0145	2.91626e-11
Bta02725	11.0078	3.38761e-11
Bta06665	10.9833	5.07016e-11
Bta14671	10.9443	9.4398e-11
Bta15032	10.8476	1.24734e-10
Bta00559	10.8448	6.18149e-11
Bta11167	10.8034	1.03388e-10
Bta04441	10.7586	8.5165e-11
Bta15291	10.7442	1.68028e-10
Bta07286	10.7323	9.18751e-11
Bta09682	10.6913	8.43666e-11
Bta12081	10.6355	8.64246e-11
Bta08018	10.5813	1.01685e-10
Bta01719	10.5779	1.22771e-10
Bta13758	10.5311	5.55651e-10
Bta07005	10.4033	1.93498e-10
Bta12080	10.3327	2.22503e-10
Bta04363	10.3215	2.21515e-10
Bta04212	10.308	3.12033e-10
Bta09265	10.2014	3.02377e-10
Bta02961	10.1996	5.88774e-10
Bta03242	10.141	9.54707e-10
Bta09227	10.1021	4.04677e-10
Bta09676	10.0607	5.81445e-10
Bta02283	10.0575	6.4205e-10
Bta13727	10.0456	1.25632e-09
Bta06168	10.0177	1.36145e-09
Bta14922	9.96279	6.2218e-10
Bta14371	9.95385	2.92508e-09
Bta02609	9.87373	1.23955e-09
Bta14399	9.80411	1.01998e-09
Bta08824	9.8041	4.49853e-09
Bta06588	9.71482	1.25506e-09
Bta11119	9.709	3.30874e-09
Bta06849	9.65059	4.13454e-09
Bta11109	9.64779	1.90881e-09
Bta08681	9.62975	1.58831e-09
Bta11942	9.5854	4.72045e-09
Bta01767	9.51913	2.31676e-09
Bta12682	9.49364	2.36151e-09
Bta02936	9.4628	2.90348e-09
Bta01937	9.37617	5.1869e-09
Bta07472	9.19236	6.64857e-09
Bta09771	9.15981	6.02279e-09
Bta01918	9.14237	8.16735e-09
Bta06690	9.10966	3.30105e-08
Bta06217	9.07771	9.21862e-09
Bta09672	9.07146	2.06537e-08
Bta01973	9.0168	9.19928e-09
Bta06458	8.98811	9.99025e-09
Bta07710	8.94168	1.16048e-08
Bta12286	8.9248	1.19232e-08
Bta05761	8.85555	6.83426e-08
Bta08697	8.84635	1.53093e-08
Bta10227	8.84582	1.5285e-08
Bta12847	8.82591	2.02712e-08
Bta07095	8.68282	1.12006e-07
Bta09536	8.56126	3.38765e-08
Bta06058	8.416	2.39972e-07
Bta02610	8.37859	1.10049e-07
Bta13755	8.36471	6.80371e-08
Bta03994	8.3377	7.70968e-08
Bta14419	8.28772	7.96527e-08
Bta07109	8.28249	3.51133e-07
Bta00300	8.27831	3.55342e-07
Bta02076	8.26358	3.70574e-07
Bta05951	8.23288	8.87766e-08
Bta13559	8.22946	2.30072e-07
Bta07469	8.21628	4.24024e-07
Bta14402	8.16403	1.6782e-07
Bta07621	8.14756	2.96188e-07
Bta11257	8.14107	1.29111e-07
Bta11923	8.10125	1.28561e-07
Bta12713	8.09971	1.28782e-07
Bta07348	8.09579	2.46997e-07
Bta01746	8.07525	1.43819e-07
Bta08743	8.03621	1.53404e-07
Bta14140	7.95849	8.82662e-07
Bta11823	7.93854	2.30468e-07
Bta12645	7.91181	2.25267e-07
Bta04780	7.911	4.18517e-07
Bta15543	7.90485	2.23412e-07
Bta06404	7.81735	2.83525e-07
Bta04440	7.7913	3.29749e-07
Bta15539	7.77784	3.18362e-07
Bta06463	7.75377	3.46468e-07
Bta15447	7.73318	3.65193e-07
Bta05386	7.72328	5.91322e-07
Bta11489	7.67317	1.12197e-06
Bta03498	7.65855	4.51735e-07
Bta10382	7.60822	2.38193e-06
Bta08431	7.60154	2.42733e-06
Bta01412	7.60046	1.01335e-06
Bta14576	7.57189	5.87794e-07
Bta07622	7.55881	1.54237e-06
Bta00064	7.55202	6.05958e-07
Bta03770	7.55052	7.31436e-07
Bta15588	7.5087	8.23993e-07
Bta07799	7.50615	1.33517e-06
Bta10226	7.50611	1.80246e-06
Bta02930	7.50197	7.53041e-07
Bta06233	7.47756	7.5795e-07
Bta00099	7.43689	2.19305e-06
Bta07368	7.43083	8.61355e-07
Bta02911	7.41223	2.35167e-06
Bta06549	7.40216	9.65196e-07
Bta06664	7.40126	1.11885e-06
Bta09996	7.39304	4.37252e-06
Bta07159	7.37681	9.97959e-07
Bta07730	7.33786	5.10793e-06
Bta09200	7.33096	1.45598e-06
Bta15433	7.30675	1.2865e-06
Bta09070	7.29484	1.44511e-06
Bta11773	7.21694	3.00814e-06
Bta12680	7.20754	1.63404e-06
Bta10320	7.19263	1.81242e-06
Bta03444	7.14328	3.70504e-06
Bta09293	7.10726	4.10203e-06
Bta02311	7.1027	5.63801e-06
Bta06264	7.09797	1.00216e-05
Bta14583	7.02537	2.74223e-06
Bta00223	7.02272	3.7131e-06
Bta03575	7.01362	2.84072e-06
Bta09618	7.00487	1.30064e-05
Bta00062	6.9573	3.94562e-06
Bta08887	6.95512	3.58997e-06
Bta14444	6.94147	3.4519e-06
Bta00960	6.93836	3.49826e-06
Bta08638	6.93752	1.57007e-05
Bta12860	6.92616	5.39913e-06
Bta10025	6.85806	1.12177e-05
Bta07391	6.81586	2.20447e-05
Bta01591	6.8039	5.61547e-06
Bta12697	6.7822	5.81573e-06
Bta11822	6.76893	8.83165e-06
Bta05899	6.75765	5.79483e-06
Bta10864	6.75241	6.32669e-06
Bta12501	6.75095	2.64093e-05
Bta13980	6.73235	6.46312e-06
Bta01002	6.72658	7.27147e-06
Bta14893	6.71036	1.00141e-05
Bta03240	6.69361	7.21089e-06
Bta02576	6.6798	7.56142e-06
Bta15793	6.67054	9.39696e-06
Bta13467	6.64925	8.9962e-06
Bta12867	6.64697	8.33025e-06
Bta13852	6.62861	9.53515e-06
Bta11025	6.62798	8.39038e-06
Bta09438	6.62756	8.57017e-06
Bta04678	6.59157	4.10984e-05
Bta06775	6.58226	2.45557e-05
Bta08039	6.5692	1.12724e-05
Bta14404	6.55948	1.10154e-05
Bta01939	6.54527	2.69031e-05
Bta06548	6.53662	4.78473e-05
Bta09913	6.53662	4.78473e-05
Bta01251	6.52639	1.11497e-05
Bta08774	6.51809	1.18324e-05
Bta09677	6.5086	2.20774e-05
Bta02602	6.49539	1.39336e-05
Bta08778	6.49146	1.32079e-05
Bta01676	6.47171	1.33295e-05
Bta14677	6.45939	1.64616e-05
Bta13850	6.43876	1.97324e-05
Bta03577	6.41684	1.62798e-05
Bta07244	6.38071	2.13134e-05
Bta15521	6.37136	1.84323e-05
Bta00632	6.36146	2.24941e-05
Bta05319	6.3562	2.071e-05
Bta06400	6.34615	4.67915e-05
Bta10396	6.33653	3.56773e-05
Bta13633	6.33494	2.10418e-05
Bta07745	6.31456	5.10718e-05
Bta08737	6.30982	2.26324e-05
Bta06715	6.2963	3.321e-05
Bta10190	6.28479	9.57172e-05
Bta07463	6.27643	9.79367e-05
Bta07117	6.2739	2.27353e-05
Bta13176	6.25453	3.24202e-05
Bta10828	6.24202	3.42017e-05
Bta08121	6.23794	3.90736e-05
Bta11946	6.23242	6.4101e-05
Bta03183	6.21438	3.69417e-05
Bta10002	6.19009	3.05688e-05
Bta11431	6.19003	0.00012406
Bta04943	6.18497	5.43556e-05
Bta02803	6.16411	3.08846e-05
Bta06403	6.15397	0.000136898
Bta06211	6.15365	3.18449e-05
Bta13381	6.14949	3.43971e-05
Bta09674	6.14557	6.06264e-05
Bta02072	6.14481	0.000140361
Bta05986	6.09824	3.80147e-05
Bta07129	6.08537	5.74173e-05
Bta08970	6.068	4.03879e-05
Bta06172	6.06765	5.55688e-05
Bta06500	6.05966	0.000176988
Bta09541	6.05966	0.000176988
Bta02228	6.05799	4.21875e-05
Bta01828	6.04921	7.9138e-05
Bta13734	6.04897	8.07905e-05
Bta05670	6.04004	0.000186682
Bta14756	6.03686	5.56421e-05
Bta07222	6.01979	7.10288e-05
Bta12110	5.99997	0.000208127
Bta01601	5.97634	5.54154e-05
Bta06960	5.96603	7.56129e-05
Bta12328	5.96534	5.42886e-05
Bta13997	5.95803	6.23502e-05
Bta06159	5.93902	6.87246e-05
Bta02452	5.92595	0.000148864
Bta12074	5.9115	6.56204e-05
Bta03285	5.90819	8.14759e-05
Bta05321	5.90553	0.000268728
Bta02612	5.9013	0.000128915
Bta01645	5.89236	6.6549e-05
Bta13002	5.83851	8.68654e-05
Bta04581	5.83521	8.85848e-05
Bta03779	5.82889	8.921e-05
Bta09165	5.76102	0.000119661
Bta05954	5.71297	0.000166688
Bta08462	5.70828	0.000456591
Bta09129	5.70828	0.000456591
Bta02837	5.69615	0.000208594
Bta11331	5.69007	0.000212078
Bta10773	5.67045	0.00012805
Bta10793	5.63395	0.000135293
Bta10845	5.60909	0.000144921
Bta07284	5.59885	0.000362005
Bta08870	5.59576	0.000274142
Bta10719	5.58883	0.00017369
Bta06528	5.57662	0.000161411
Bta14750	5.56644	0.000341574
Bta05323	5.56371	0.000171099
Bta11930	5.54348	0.000245708
Bta07277	5.53621	0.000183161
Bta03576	5.52675	0.000205135
Bta04273	5.52511	0.000278405
Bta04731	5.49933	0.000473159
Bta08257	5.48583	0.000275616
Bta11941	5.48551	0.000207922
Bta07521	5.47963	0.000211311
Bta04823	5.47797	0.000390894
Bta10430	5.45041	0.000252828
Bta08687	5.4499	0.000264314
Bta13645	5.43589	0.000292853
Bta12677	5.42024	0.000980228
Bta02032	5.41728	0.000267004
Bta12950	5.4054	0.000505035
Bta11180	5.38547	0.000300978
Bta08686	5.37386	0.000330892
Bta11414	5.37098	0.000406659
Bta10829	5.36583	0.000352262
Bta15771	5.3573	0.0003487
Bta10477	5.35517	0.000311561
Bta10504	5.34069	0.000364995
Bta11620	5.33707	0.000394797
Bta14119	5.32826	0.000315875
Bta11743	5.32781	0.000315485
Bta12983	5.32616	0.0012544
Bta08142	5.32138	0.00032058
Bta11220	5.30689	0.000374988
Bta00094	5.30647	0.000514788
Bta14926	5.30165	0.000571576
Bta14289	5.29868	0.000808478
Bta13430	5.27699	0.00085637
Bta12641	5.26556	0.000677847
Bta00540	5.25985	0.000423246
Bta07177	5.25651	0.000564838
Bta10930	5.2465	0.000558079
Bta13962	5.23786	0.000402683
Bta11890	5.23261	0.000963171
Bta02647	5.23092	0.000507653
Bta02205	5.22767	0.000738794
Bta11649	5.2108	0.000772794
Bta06550	5.20901	0.00064334
Bta13267	5.18987	0.000544264
Bta05625	5.16774	0.000866671
Bta14653	5.16551	0.000571964
Bta10564	5.16548	0.0015091
Bta10001	5.16337	0.00115626
Bta10636	5.16337	0.00115626
Bta09169	5.15427	0.00196007
Bta04902	5.15127	0.000552453
Bta00841	5.1431	0.000521088
Bta07773	5.14241	0.000530504
Bta13274	5.14049	0.000584155
Bta12836	5.14011	0.00052359
Bta11873	5.13733	0.000573657
Bta10745	5.13521	0.000796531
Bta10589	5.12809	0.000811821
Bta05209	5.12159	0.000578054
Bta11044	5.12047	0.000554075
Bta14308	5.10458	0.000580033
Bta00808	5.10301	0.00135499
Bta11465	5.09039	0.000700175
Bta11206	5.07158	0.000779275
Bta02126	5.06847	0.0008063
Bta07132	5.06397	0.00066786
Bta13416	5.05817	0.000710141
Bta02130	5.05082	0.00097673
Bta12526	5.04738	0.000685569
Bta04328	5.04703	0.000731744
Bta07744	5.04597	0.000902643
Bta01448	5.04037	0.00262604
Bta03175	5.04037	0.00262604
Bta12358	5.04002	0.00159779
Bta01763	5.03985	0.00121616
Bta05904	5.01293	0.0014134
Bta11313	5.00146	0.000939957
Bta11083	4.9856	0.00118557
Bta10447	4.98137	0.00141866
Bta07585	4.97985	0.00306399
Bta13259	4.97564	0.000913846
Bta08973	4.96238	0.00117776
Bta14948	4.96061	0.00196475
Bta08322	4.95996	0.0016349
Bta07505	4.95041	0.00106204
Bta11612	4.94289	0.000929512
Bta06518	4.94102	0.00157716
Bta01592	4.93961	0.00114713
Bta01869	4.93926	0.000901383
Bta08203	4.93805	0.00340679
Bta05955	4.93728	0.000908682
Bta04701	4.93373	0.000924937
Bta12547	4.93357	0.00112627
Bta07065	4.92218	0.00109807
Bta04737	4.89501	0.00379831
Bta05494	4.88938	0.00112118
Bta07211	4.88894	0.0018074
Bta04746	4.87444	0.00131758
Bta01491	4.87299	0.00401491
Bta00911	4.87293	0.00142869
Bta02823	4.87292	0.00109623
Bta00858	4.87242	0.00107966
Bta06608	4.86443	0.00110302
Bta12079	4.86243	0.00110896
Bta06426	4.8516	0.00165407
Bta01803	4.84514	0.00211503
Bta11702	4.83859	0.00131678
Bta01846	4.82793	0.00449588
Bta14076	4.82497	0.00123661
Bta11096	4.81867	0.00183978
Bta08104	4.80812	0.00140669
Bta04417	4.80485	0.00476305
Bta09730	4.7925	0.00137133
Bta08944	4.79169	0.00133961
Bta05992	4.78877	0.0015642
Bta08742	4.78676	0.00135733
Bta05460	4.78141	0.00505011
Bta00791	4.77373	0.00206902
Bta12417	4.76697	0.00151116
Bta07291	4.75578	0.00257045
Bta05423	4.74874	0.00179614
Bta11532	4.74608	0.00222363
Bta14488	4.73153	0.00159764
Bta04241	4.72949	0.00167132
Bta10415	4.72807	0.00166354
Bta04290	4.72407	0.00193222
Bta05668	4.72179	0.00197017
Bta07477	4.71176	0.00196158
Bta07573	4.70746	0.00372947
Bta14918	4.70195	0.00174764
Bta20014	4.69878	0.00251445
Bta01716	4.68362	0.00643591
Bta03182	4.68362	0.00643591
Bta12101	4.6818	0.00199241
Bta05227	4.67505	0.00182634
Bta13662	4.67473	0.00183123
Bta14312	4.67404	0.00223245
Bta02951	4.66602	0.00190174
Bta02104	4.65952	0.00327348
Bta10259	4.65952	0.00327348
Bta02950	4.64219	0.00444201
Bta00645	4.63182	0.00249243
Bta04368	4.62669	0.00267169
Bta09522	4.62538	0.00211519
Bta10827	4.62512	0.00463747
Bta03678	4.62025	0.00309193
Bta02762	4.61368	0.00215432
Bta12728	4.61341	0.00217903
Bta07016	4.60785	0.00484366
Bta12953	4.60785	0.00484366
Bta00840	4.59544	0.00226423
Bta14961	4.59528	0.00379404
Bta02159	4.58312	0.00245297
Bta11573	4.5813	0.00242526
Bta00855	4.57887	0.00249405
Bta08677	4.57871	0.00832255
Bta01919	4.56975	0.00411724
Bta06477	4.56975	0.00411724
Bta06913	4.565	0.00258722
Bta03455	4.56006	0.00249576
Bta05254	4.55476	0.00553399
Bta01762	4.5506	0.00257225
Bta10764	4.54681	0.00372048
Bta12170	4.53613	0.0050265
Bta15154	4.53246	0.00305969
Bta09795	4.52733	0.00464857
Bta03489	4.52113	0.00290475
Bta05537	4.51566	0.00366886
Bta09125	4.50857	0.0117807
Bta00151	4.50734	0.00482835
Bta03187	4.5052	0.00286683
Bta04819	4.48809	0.00506384
Bta03239	4.48802	0.00356405
Bta08148	4.47304	0.00310789
Bta03338	4.46852	0.00579855
Bta12484	4.45783	0.0039278
Bta13696	4.45248	0.00363186
Bta13942	4.43673	0.00367319
Bta09204	4.4314	0.00534598
Bta10795	4.42864	0.00400024
Bta12181	4.42423	0.005084
Bta06484	4.42321	0.00393802
Bta06604	4.42317	0.00354648
Bta05894	4.42272	0.00768278
Bta06519	4.42272	0.00768278
Bta03075	4.42245	0.00380508
Bta06534	4.42049	0.00558018
Bta01968	4.41958	0.00454659
Bta06416	4.41477	0.00665484
Bta13746	4.41275	0.006756
Bta07167	4.41255	0.00523651
Bta03995	4.41254	0.00930163
Bta11531	4.4055	0.012627
Bta09491	4.40264	0.00380435
Bta11614	4.39739	0.00503443
Bta03893	4.38659	0.00653376
Bta10879	4.38659	0.00653376
Bta06210	4.38309	0.00476091
Bta09145	4.37132	0.00654028
Bta11020	4.36798	0.00416369
Bta09124	4.35447	0.00779875
Bta06382	4.35333	0.00452729
Bta05785	4.35289	0.00662374
Bta02726	4.35287	0.0106678
Bta04768	4.35267	0.00531342
Bta13042	4.35034	0.00435908
Bta08580	4.34615	0.00589489
Bta06003	4.34349	0.00445377
Bta10372	4.3428	0.0146458
Bta02184	4.34042	0.00628032
Bta07465	4.34016	0.00567081
Bta13470	4.33917	0.0079427
Bta02687	4.33724	0.00530864
Bta06848	4.33183	0.00650743
Bta08821	4.32565	0.00582838
Bta10242	4.32521	0.00761203
Bta10180	4.32261	0.00850058
Bta01007	4.31929	0.00509835
Bta08449	4.3131	0.00739813
Bta01201	4.30885	0.00491669
Bta05448	4.29962	0.00543444
Bta01725	4.29904	0.0103978
Bta08553	4.2956	0.00591168
Bta09614	4.29013	0.00534375
Bta11560	4.28809	0.00646642
Bta07951	4.27727	0.0170754
Bta13543	4.27727	0.0170754
Bta13918	4.2722	0.0104867
Bta07933	4.2683	0.00633369
Bta05550	4.25155	0.0102066
Bta01994	4.24229	0.00651313
Bta03313	4.23738	0.00654363
Bta15029	4.23458	0.0112691
Bta01726	4.23188	0.00650187
Bta01537	4.22904	0.00845627
Bta11916	4.22582	0.0077301
Bta12399	4.22498	0.00837617
Bta13626	4.21485	0.00771652
Bta02099	4.21108	0.0100825
Bta09039	4.20861	0.0200176
Bta08537	4.20774	0.00783456
Bta11811	4.20246	0.00625669
Bta10955	4.20191	0.0162116
Bta07990	4.20153	0.00770333
Bta09818	4.19347	0.00965975
Bta15511	4.18727	0.00815271
Bta00186	4.18721	0.0136117
Bta06825	4.18721	0.0136117
Bta07007	4.18435	0.00926108
Bta03351	4.1793	0.00750533
Bta05890	4.17852	0.00755141
Bta04987	4.17347	0.00687601
Bta11159	4.17337	0.00803712
Bta05088	4.17301	0.0217206
Bta06309	4.17301	0.0217206
Bta09261	4.16488	0.0102509
Bta08080	4.16146	0.00945252
Bta08974	4.14891	0.0130787
Bta02813	4.14788	0.0118353
Bta06378	4.14296	0.00809999
Bta02748	4.14157	0.011941
Bta01872	4.13894	0.00757423
Bta13548	4.13282	0.0100909
Bta01014	4.12927	0.0151959
Bta07487	4.12144	0.012304
Bta08555	4.11046	0.00794477
Bta11606	4.10949	0.00815738
Bta11647	4.1079	0.00809611
Bta07763	4.10552	0.0130279
Bta03343	4.103	0.00957344
Bta08591	4.09965	0.00821315
Bta03966	4.09908	0.0256899
Bta09327	4.09702	0.0132437
Bta13200	4.09179	0.00926777
Bta15628	4.09167	0.00980661
Bta12371	4.08606	0.014954
Bta12111	4.08178	0.00886293
Bta12536	4.07929	0.00870882
Bta03393	4.07679	0.0096685
Bta13203	4.07328	0.00905973
Bta04654	4.07105	0.011085
Bta00157	4.06064	0.0280049
Bta00238	4.06064	0.0280049
Bta02092	4.06064	0.0280049
Bta05961	4.06064	0.0280049
Bta13067	4.04794	0.00930435
Bta05137	4.04393	0.00935268
Bta08751	4.03982	0.011187
Bta04423	4.03944	0.0102658
Bta00647	4.0348	0.0103409
Bta09245	4.02861	0.00982439
Bta12093	4.02712	0.0132691
Bta15386	4.02367	0.0120385
Bta01930	4.02339	0.0134298
Bta00347	4.02114	0.0305783
Bta01142	4.02114	0.0305783
Bta03157	4.02088	0.0125298
Bta08059	4.01608	0.0113051
Bta03281	4.00869	0.0187182
Bta07945	4.00792	0.0202004
Bta10000	4.00394	0.0119149
Bta01477	4.00127	0.0124204
Bta14816	3.99787	0.0111351
Bta01292	3.99606	0.0105549
Bta08043	3.99353	0.010711
Bta03411	3.99114	0.010668
Bta00942	3.98054	0.0334444
Bta08161	3.98054	0.0334444
Bta04856	3.9795	0.0109873
Bta08684	3.96957	0.0112571
Bta08070	3.96683	0.0113751
Bta12024	3.96243	0.0135145
Bta14260	3.96203	0.0158933
Bta03460	3.96106	0.0231349
Bta10159	3.94219	0.0151581
Bta09731	3.94207	0.0143554
Bta13159	3.93756	0.0136991
Bta00739	3.93611	0.0123081
Bta02470	3.93401	0.018343
Bta05521	3.9336	0.0246386
Bta06379	3.93098	0.021885
Bta12818	3.92962	0.0171701
Bta00426	3.92646	0.0130312
Bta06098	3.92545	0.0125599
Bta11116	3.92506	0.0127264
Bta08761	3.90617	0.0222135
Bta03348	3.9056	0.0262631
Bta04732	3.9056	0.0262631
Bta09399	3.90044	0.0243491
Bta01500	3.89573	0.0402166
Bta07355	3.89573	0.0402166
Bta11133	3.88174	0.0272105
Bta04824	3.88161	0.0145413
Bta09886	3.88103	0.0167738
Bta06996	3.87196	0.0196603
Bta15427	3.86253	0.0201224
Bta06852	3.85724	0.01528
Bta09640	3.85453	0.0167456
Bta02429	3.84461	0.0191352
Bta11939	3.84353	0.0166348
Bta12398	3.83876	0.0158044
Bta08861	3.8375	0.0155974
Bta03539	3.83174	0.0339568
Bta06132	3.82887	0.0159391
Bta05245	3.8182	0.0319808
Bta10466	3.8182	0.0319808
Bta10345	3.80587	0.0198866
Bta12248	3.80563	0.0487107
Bta06618	3.80307	0.0231121
Bta04772	3.80068	0.0212254
Bta08230	3.79627	0.0411283
Bta03178	3.79398	0.020244
Bta15557	3.79211	0.0177832
Bta13117	3.78574	0.0219834
Bta12866	3.78276	0.0281181
Bta13048	3.77504	0.0185386
Bta11720	3.7663	0.0353693
Bta02435	3.76367	0.0200877
Bta00397	3.76072	0.0193517
Bta07341	3.75684	0.0366405
Bta08343	3.75631	0.0208224
Bta08413	3.75448	0.0378377
Bta09764	3.75252	0.0223905
Bta09105	3.75168	0.0377233
Bta13302	3.75147	0.0202292
Bta05886	3.75139	0.0233193
Bta02394	3.74482	0.0195501
Bta11548	3.74192	0.0198147
Bta02981	3.74084	0.0267543
Bta01904	3.73044	0.0229576
Bta12649	3.72899	0.0247992
Bta13679	3.72749	0.0203632
Bta14674	3.71831	0.0379837
Bta08184	3.70929	0.0466279
Bta06432	3.70871	0.0277961
Bta11165	3.70317	0.0372454
Bta10865	3.70221	0.0272825
Bta14320	3.6982	0.0225097
Bta09132	3.69741	0.0236928
Bta13029	3.69661	0.0243546
Bta00163	3.68808	0.0230641
Bta12025	3.68732	0.023946
Bta15802	3.68685	0.027161
Bta08718	3.68459	0.0346808
Bta20011	3.6843	0.0359625
Bta08227	3.68172	0.0238338
Bta04122	3.68149	0.0315169
Bta08958	3.68143	0.0259494
Bta01715	3.67217	0.0460854
Bta04589	3.67207	0.0335609
Bta04708	3.66738	0.0243415
Bta01543	3.66705	0.0295907
Bta10826	3.65994	0.0366354
Bta02597	3.65262	0.0247124
Bta04181	3.65072	0.0256908
Bta13527	3.64108	0.0250949
Bta00314	3.63715	0.0360622
Bta14573	3.63486	0.0387243
Bta00991	3.62755	0.0277309
Bta13883	3.6257	0.0486724
Bta00287	3.62007	0.0351285
Bta00512	3.61923	0.0269593
Bta10937	3.61838	0.0265695
Bta10738	3.61641	0.0284559
Bta14343	3.61475	0.0279653
Bta09224	3.61404	0.0393662
Bta12432	3.60954	0.0406809
Bta06554	3.60642	0.0281438
Bta09684	3.6052	0.0304725
Bta13595	3.6043	0.0418986
Bta05113	3.60402	0.0274789
Bta01639	3.6008	0.0288569
Bta09072	3.59796	0.0306101
Bta10541	3.59679	0.0279478
Bta05435	3.59316	0.0342435
Bta04583	3.58365	0.0306564
Bta12608	3.57	0.0309844
Bta10288	3.56017	0.0303344
Bta01551	3.55959	0.0317355
Bta11842	3.55883	0.034889
Bta13510	3.55841	0.0370242
Bta05259	3.55691	0.0459093
Bta12602	3.55604	0.036521
Bta10229	3.5491	0.0325087
Bta11603	3.5457	0.0437816
Bta07574	3.54552	0.0332252
Bta10799	3.54072	0.0385164
Bta00377	3.53327	0.0326255
Bta06986	3.53098	0.0478152
Bta13397	3.52996	0.0486526
Bta15564	3.5235	0.0362805
Bta11553	3.5228	0.0400816
Bta14973	3.51811	0.0350976
Bta15242	3.5121	0.0361328
Bta15086	3.50632	0.0359088
Bta04279	3.50278	0.0349263
Bta01478	3.50219	0.0370965
Bta04537	3.49937	0.0364926
Bta02439	3.49746	0.0400394
Bta00548	3.49641	0.0362552
Bta05792	3.49637	0.0351512
Bta06447	3.4905	0.042707
Bta14564	3.49032	0.0397144
Bta08461	3.48099	0.0382522
Bta01487	3.47927	0.0499188
Bta03176	3.46904	0.0377199
Bta04799	3.45855	0.0383418
Bta09193	3.45109	0.0405984
Bta04656	3.43978	0.0416397
Bta05086	3.43718	0.0402273
Bta03022	3.43678	0.0439302
Bta12220	3.43423	0.0431834
Bta11347	3.43335	0.0461315
Bta06728	3.43296	0.0480117
Bta13401	3.43079	0.0418638
Bta09344	3.42973	0.0491555
Bta09391	3.42729	0.0415002
Bta09177	3.42562	0.0466858
Bta09043	3.42465	0.0479721
Bta11396	3.3751	0.0472213
Bta10140	3.36917	0.0480524
Bta12285	3.36715	0.0482206
Bta06115	3.36432	0.0496703
Bta11844	3.35801	0.0498982
Bta04108	3.35612	0.0492751
Bta03245	3.34241	0.0499327

## Sheet: salivary gland
	log2(FoldChange)	FDR
Bta09046	-3.1842	0.0483055
Bta10981	-3.22045	0.0442896
Bta13016	-3.22188	0.0440232
Bta12850	-3.23734	0.0429549
Bta13218	-3.23812	0.0470799
Bta14486	-3.23891	0.0456852
Bta10092	-3.24128	0.0424341
Bta02077	-3.24381	0.042667
Bta10434	-3.24411	0.043398
Bta00597	-3.24914	0.0425357
Bta13797	-3.25588	0.0428783
Bta07408	-3.25686	0.0437179
Bta03346	-3.26145	0.0485319
Bta13243	-3.2635	0.047597
Bta03478	-3.26806	0.0403791
Bta10097	-3.26988	0.0407225
Bta02351	-3.27335	0.038785
Bta11839	-3.28061	0.0391093
Bta03332	-3.28222	0.0431046
Bta13221	-3.29565	0.0391774
Bta15276	-3.31131	0.0430135
Bta12474	-3.31634	0.0346062
Bta11813	-3.32074	0.0411873
Bta07678	-3.32837	0.0404979
Bta12636	-3.33428	0.033046
Bta13629	-3.33464	0.0341347
Bta02235	-3.33645	0.0477886
Bta05381	-3.34341	0.0352405
Bta13181	-3.34994	0.0419732
Bta13613	-3.35158	0.0460589
Bta02183	-3.36286	0.0361086
Bta04603	-3.36611	0.030392
Bta08200	-3.36972	0.0441288
Bta12428	-3.37801	0.0340301
Bta08620	-3.38302	0.0360419
Bta04033	-3.38323	0.0305618
Bta11591	-3.38577	0.0299406
Bta05285	-3.39042	0.0308056
Bta03507	-3.393	0.0433092
Bta07884	-3.39828	0.0289883
Bta01106	-3.40223	0.0407896
Bta11251	-3.40385	0.0361405
Bta01087	-3.40615	0.0340168
Bta06882	-3.41165	0.0417848
Bta00979	-3.41869	0.0330255
Bta03274	-3.42344	0.0348654
Bta08494	-3.42419	0.0489781
Bta08930	-3.43403	0.03774
Bta06802	-3.43848	0.0431917
Bta09803	-3.44224	0.0395664
Bta01009	-3.44275	0.0328874
Bta03953	-3.44408	0.0273897
Bta03537	-3.4475	0.025162
Bta10997	-3.44884	0.0244509
Bta07160	-3.45984	0.0247687
Bta04596	-3.46035	0.0243918
Bta13884	-3.46276	0.0248605
Bta09383	-3.4756	0.0240366
Bta00704	-3.47708	0.0393512
Bta15569	-3.47798	0.0257533
Bta00510	-3.48858	0.0243811
Bta03633	-3.49451	0.0220745
Bta14365	-3.4956	0.0324024
Bta03809	-3.49668	0.0470735
Bta10066	-3.49668	0.0470735
Bta07999	-3.50006	0.0232984
Bta08042	-3.50233	0.0234088
Bta04882	-3.50823	0.0250794
Bta07637	-3.51026	0.0207886
Bta01479	-3.51295	0.0317119
Bta07496	-3.51467	0.0408474
Bta07070	-3.5177	0.0211851
Bta01787	-3.51796	0.0205945
Bta13845	-3.51837	0.0257184
Bta02114	-3.51854	0.0208462
Bta09394	-3.52543	0.030067
Bta08154	-3.53205	0.0228599
Bta14145	-3.53736	0.0352703
Bta09600	-3.5458	0.0419081
Bta05066	-3.54865	0.0300118
Bta03597	-3.55133	0.0328002
Bta09705	-3.55845	0.0230413
Bta14006	-3.55845	0.0230413
Bta05719	-3.56056	0.0207422
Bta11617	-3.56056	0.0207422
Bta15755	-3.5619	0.0194981
Bta15045	-3.56598	0.0318778
Bta00981	-3.57676	0.0444826
Bta07421	-3.58021	0.0172509
Bta09384	-3.58329	0.0259624
Bta11398	-3.5856	0.0219828
Bta15103	-3.58707	0.0300071
Bta10996	-3.59331	0.0373891
Bta11880	-3.604	0.0178738
Bta01299	-3.60427	0.0220884
Bta14723	-3.60934	0.0158883
Bta00010	-3.60999	0.0165042
Bta06359	-3.61452	0.0156828
Bta02998	-3.6191	0.0196518
Bta01180	-3.62689	0.0197929
Bta07006	-3.63053	0.0150047
Bta07149	-3.63351	0.0156278
Bta11225	-3.63371	0.0149718
Bta04383	-3.63867	0.0168422
Bta02546	-3.63892	0.0225008
Bta15064	-3.63892	0.0225008
Bta02974	-3.6393	0.0334281
Bta06908	-3.6393	0.0334281
Bta06947	-3.6393	0.0334281
Bta11403	-3.6393	0.0334281
Bta13530	-3.65399	0.0140055
Bta02557	-3.65485	0.0255797
Bta10096	-3.66473	0.0168884
Bta10239	-3.66596	0.0209754
Bta06133	-3.66985	0.0140419
Bta07510	-3.67313	0.046006
Bta12471	-3.67313	0.046006
Bta02457	-3.68297	0.0137095
Bta05019	-3.68387	0.029949
Bta09007	-3.68387	0.029949
Bta10560	-3.68387	0.029949
Bta00112	-3.68455	0.0135032
Bta01153	-3.68959	0.0128145
Bta00926	-3.6925	0.0209179
Bta07836	-3.69465	0.0174131
Bta15718	-3.69484	0.0189761
Bta02146	-3.69619	0.0160052
Bta10785	-3.70083	0.0127305
Bta04210	-3.71721	0.0224812
Bta00830	-3.71966	0.0116662
Bta00870	-3.72177	0.0212982
Bta08739	-3.72177	0.0212982
Bta12799	-3.72471	0.0121895
Bta03297	-3.72674	0.0124706
Bta01240	-3.7271	0.0268869
Bta05466	-3.7271	0.0268869
Bta08187	-3.72823	0.0114078
Bta05215	-3.73274	0.012174
Bta04666	-3.75357	0.0196111
Bta01880	-3.7589	0.0146643
Bta11172	-3.76937	0.0131335
Bta13976	-3.76937	0.0131335
Bta02827	-3.77787	0.0139796
Bta04253	-3.7797	0.0138646
Bta13357	-3.78466	0.00990881
Bta06926	-3.78468	0.0180797
Bta08054	-3.79716	0.0373889
Bta13728	-3.80206	0.0139741
Bta01778	-3.80356	0.009227
Bta06331	-3.80987	0.0217997
Bta14472	-3.80987	0.0217997
Bta02332	-3.81304	0.00907766
Bta10058	-3.81726	0.00897813
Bta05888	-3.82105	0.01003
Bta03546	-3.82249	0.00942653
Bta03655	-3.83476	0.00866256
Bta00710	-3.83902	0.0108535
Bta05969	-3.84035	0.0117584
Bta14875	-3.85834	0.00889144
Bta01882	-3.85857	0.0295536
Bta06405	-3.8603	0.00884072
Bta06225	-3.86526	0.00828719
Bta10910	-3.87145	0.00774037
Bta08725	-3.87663	0.0119572
Bta04307	-3.88497	0.00905782
Bta12736	-3.88702	0.0104388
Bta05816	-3.88815	0.0178106
Bta12284	-3.89855	0.010022
Bta15712	-3.90283	0.0132136
Bta01608	-3.90307	0.0070253
Bta02485	-3.90769	0.00872266
Bta03117	-3.91544	0.0256834
Bta11691	-3.92047	0.00724869
Bta07409	-3.92273	0.00845135
Bta13516	-3.92575	0.0161431
Bta09407	-3.92654	0.00821573
Bta03163	-3.93059	0.00640492
Bta02024	-3.93199	0.00685698
Bta05327	-3.93609	0.00903314
Bta13195	-3.93868	0.00772048
Bta01889	-3.96638	0.00580233
Bta00543	-3.97016	0.0223966
Bta03932	-3.97016	0.0223966
Bta04739	-3.97016	0.0223966
Bta12628	-3.97016	0.0223966
Bta03594	-3.97611	0.00661446
Bta15660	-3.98443	0.00723721
Bta14146	-3.9932	0.00661779
Bta12600	-3.99813	0.0133314
Bta09472	-3.99924	0.00854763
Bta14410	-3.99924	0.00854763
Bta15044	-4.00167	0.00579793
Bta05158	-4.00633	0.00516103
Bta10917	-4.00836	0.00738281
Bta13636	-4.01024	0.0174354
Bta13084	-4.02034	0.00806084
Bta04836	-4.033	0.0121455
Bta00190	-4.03337	0.005723
Bta03834	-4.04114	0.00760676
Bta08045	-4.04424	0.00464521
Bta15150	-4.04463	0.00610325
Bta02649	-4.04828	0.00490834
Bta07846	-4.04831	0.00526935
Bta15188	-4.06368	0.00852636
Bta14885	-4.06562	0.00742139
Bta02706	-4.06644	0.00476822
Bta03991	-4.07372	0.0171993
Bta04491	-4.07372	0.0171993
Bta07245	-4.08035	0.00415236
Bta02709	-4.08794	0.004618
Bta08050	-4.08835	0.0041788
Bta14396	-4.08884	0.00617567
Bta12627	-4.09649	0.00467886
Bta10408	-4.10179	0.00641671
Bta11084	-4.10676	0.00400233
Bta09111	-4.10959	0.00469144
Bta00374	-4.12145	0.00607039
Bta06385	-4.12285	0.015143
Bta09297	-4.12285	0.015143
Bta03900	-4.12423	0.00594995
Bta02337	-4.12524	0.0094217
Bta05593	-4.12784	0.00376254
Bta12134	-4.13099	0.0036486
Bta07849	-4.13283	0.00927184
Bta10503	-4.14085	0.00574617
Bta15246	-4.14475	0.00345318
Bta04362	-4.14546	0.00341713
Bta02454	-4.14579	0.00397983
Bta02474	-4.15008	0.0036724
Bta15224	-4.1539	0.00591043
Bta00042	-4.15799	0.00441101
Bta02929	-4.16166	0.00325416
Bta09263	-4.16625	0.00326356
Bta05707	-4.17888	0.00515771
Bta09316	-4.17935	0.00341
Bta11627	-4.18525	0.00607594
Bta12195	-4.18573	0.0041835
Bta06030	-4.19575	0.00780274
Bta10673	-4.19723	0.00293695
Bta09377	-4.20838	0.00569263
Bta06885	-4.21242	0.00428476
Bta13586	-4.21594	0.00463989
Bta15586	-4.21611	0.00424355
Bta01236	-4.21921	0.00327648
Bta00195	-4.23145	0.00365249
Bta15285	-4.23269	0.00422207
Bta01094	-4.24007	0.00296031
Bta03954	-4.24906	0.00288279
Bta06086	-4.26092	0.0105165
Bta09637	-4.26092	0.0105165
Bta14199	-4.26675	0.0024293
Bta02486	-4.26934	0.0025665
Bta02189	-4.26962	0.00235394
Bta06582	-4.26965	0.00314366
Bta09349	-4.2698	0.00397491
Bta11786	-4.28134	0.00227866
Bta11780	-4.28158	0.00268428
Bta14830	-4.28205	0.00227566
Bta06640	-4.28525	0.00608653
Bta09635	-4.28525	0.00608653
Bta03580	-4.29736	0.00442172
Bta04324	-4.30189	0.00246554
Bta02518	-4.30415	0.00936377
Bta02012	-4.30736	0.0028039
Bta04774	-4.30747	0.00210305
Bta07883	-4.31149	0.00294735
Bta04453	-4.31347	0.00207404
Bta01133	-4.31389	0.00561749
Bta10520	-4.31389	0.00561749
Bta14416	-4.31908	0.00234282
Bta03477	-4.32367	0.00202344
Bta13024	-4.32745	0.00232863
Bta09004	-4.32885	0.0019873
Bta02570	-4.3294	0.00255363
Bta02498	-4.33421	0.00322184
Bta11841	-4.34066	0.00196047
Bta00550	-4.34198	0.00519103
Bta10341	-4.34613	0.00835867
Bta12885	-4.34613	0.00835867
Bta14314	-4.34613	0.00835867
Bta04394	-4.34929	0.00835043
Bta07588	-4.36525	0.00189283
Bta00261	-4.36865	0.00181523
Bta11652	-4.37183	0.00295682
Bta01175	-4.37389	0.00366237
Bta07154	-4.37843	0.00172243
Bta00636	-4.37848	0.00284025
Bta12015	-4.38692	0.00747974
Bta05734	-4.38991	0.0017794
Bta14448	-4.39656	0.00444869
Bta04361	-4.42309	0.00412544
Bta15294	-4.42659	0.00670901
Bta00627	-4.43037	0.00198469
Bta13496	-4.43274	0.00216789
Bta15369	-4.43966	0.00185137
Bta06896	-4.44143	0.00141417
Bta10110	-4.44915	0.00382992
Bta12472	-4.44915	0.00382992
Bta12225	-4.46519	0.00603135
Bta05699	-4.46712	0.00223586
Bta02109	-4.47474	0.00355939
Bta03253	-4.49256	0.0016553
Bta10366	-4.49283	0.00233381
Bta02118	-4.49438	0.00124132
Bta01901	-4.4962	0.00151768
Bta07834	-4.49842	0.00247211
Bta01511	-4.50279	0.00543396
Bta01900	-4.51792	0.00152784
Bta06799	-4.5246	0.00308391
Bta10467	-4.53456	0.00107621
Bta07848	-4.53548	0.00221759
Bta01826	-4.53706	0.0010772
Bta09259	-4.53944	0.00490602
Bta12430	-4.53944	0.00490602
Bta05515	-4.54242	0.00121099
Bta15340	-4.54583	0.00102734
Bta13216	-4.54748	0.00110004
Bta04256	-4.56414	0.00100227
Bta08086	-4.5716	0.00199386
Bta07330	-4.5728	0.00268257
Bta09437	-4.5728	0.00268257
Bta00304	-4.57455	0.000946375
Bta03296	-4.57518	0.00443833
Bta02244	-4.58229	0.00138794
Bta09274	-4.58372	0.00105614
Bta08259	-4.58524	0.00199559
Bta03798	-4.59631	0.0025055
Bta07938	-4.59631	0.0025055
Bta01832	-4.61288	0.00100051
Bta14291	-4.61431	0.000930004
Bta01342	-4.61944	0.00234226
Bta03094	-4.62415	0.00170687
Bta07736	-4.6386	0.000805034
Bta14837	-4.63865	0.000787171
Bta07405	-4.63876	0.000765586
Bta07503	-4.64221	0.00219161
Bta09869	-4.6441	0.00365346
Bta08592	-4.66344	0.000757468
Bta00693	-4.66436	0.00114076
Bta08764	-4.67659	0.000690247
Bta13069	-4.68191	0.000864407
Bta10721	-4.68978	0.000717945
Bta11851	-4.69861	0.000647386
Bta15306	-4.70769	0.00133099
Bta15709	-4.72074	0.000607695
Bta03558	-4.72984	0.0016942
Bta00941	-4.74168	0.00276539
Bta15420	-4.74223	0.000580742
Bta03732	-4.75559	0.00115305
Bta14588	-4.75796	0.000890227
Bta11115	-4.76202	0.000520021
Bta13086	-4.77025	0.000595863
Bta09480	-4.77174	0.00149675
Bta05931	-4.78016	0.000509162
Bta08833	-4.78183	0.00184179
Bta10769	-4.78312	0.000504456
Bta09959	-4.78413	0.000596687
Bta01962	-4.79126	0.000507785
Bta13015	-4.82303	0.000604176
Bta00918	-4.83308	0.00212407
Bta00141	-4.83456	0.000422122
Bta13303	-4.83678	0.000455893
Bta11021	-4.85911	0.000388424
Bta09615	-4.89019	0.000491091
Bta02355	-4.89042	0.000767301
Bta02225	-4.89059	0.00105024
Bta12767	-4.90051	0.000383847
Bta03485	-4.90465	0.000734812
Bta13800	-4.9146	0.000455362
Bta01090	-4.91874	0.000703962
Bta04267	-4.91874	0.000703962
Bta08031	-4.91902	0.0016532
Bta07967	-4.93283	0.000371866
Bta00824	-4.94339	0.000316221
Bta04542	-4.94654	0.000887717
Bta07384	-4.94654	0.000887717
Bta09442	-4.9583	0.000298913
Bta07723	-4.96472	0.000840378
Bta02728	-4.97551	0.000273127
Bta11087	-4.97572	0.000278842
Bta00873	-4.98217	0.000260556
Bta14015	-4.98283	0.000408381
Bta06784	-5.00014	0.00130223
Bta05873	-5.0004	0.000754479
Bta10919	-5.0004	0.000754479
Bta08138	-5.00083	0.000252152
Bta00034	-5.03126	0.00022893
Bta09598	-5.03522	0.000678912
Bta04763	-5.03566	0.000346573
Bta14090	-5.03799	0.000224198
Bta11190	-5.05179	0.00111752
Bta07485	-5.06531	0.00044937
Bta01172	-5.08799	0.0001887
Bta08178	-5.10243	0.000553308
Bta05149	-5.11742	0.000241887
Bta03081	-5.12595	0.00089595
Bta11808	-5.13617	0.000198715
Bta14582	-5.1452	0.000156017
Bta01684	-5.15215	0.00020056
Bta12263	-5.16135	0.000147721
Bta07481	-5.16665	0.000454607
Bta09956	-5.19252	0.000174006
Bta15571	-5.22622	0.00022092
Bta10306	-5.22814	0.000376319
Bta11413	-5.2326	0.000267637
Bta01655	-5.23325	0.000117132
Bta04342	-5.24286	0.000116822
Bta15288	-5.25793	0.000343289
Bta08337	-5.26746	0.000125075
Bta13115	-5.27353	0.000108715
Bta05744	-5.28619	9.88533e-05
Bta05420	-5.30572	0.00017209
Bta04853	-5.30689	0.00051935
Bta11273	-5.30689	0.00051935
Bta03078	-5.31572	0.00028709
Bta09809	-5.31809	0.000111577
Bta14861	-5.32863	9.91461e-05
Bta08560	-5.32981	0.000274814
Bta05103	-5.33128	0.000158773
Bta10056	-5.3562	7.90945e-05
Bta08621	-5.36466	0.000142892
Bta10461	-5.36466	0.000142892
Bta10582	-5.37276	7.596e-05
Bta08270	-5.38031	7.81089e-05
Bta04555	-5.3895	0.00040378
Bta05694	-5.3895	0.00040378
Bta10639	-5.39828	0.00022211
Bta13378	-5.4291	0.000357685
Bta04073	-5.42919	0.00011649
Bta01005	-5.43246	0.000143045
Bta02243	-5.4485	0.000337019
Bta05735	-5.45823	7.12712e-05
Bta14432	-5.4633	5.61515e-05
Bta01239	-5.46653	5.91811e-05
Bta12754	-5.47875	6.12483e-05
Bta01712	-5.48899	0.00016728
Bta07402	-5.50972	5.54343e-05
Bta13786	-5.51419	8.67502e-05
Bta05789	-5.51826	0.000109068
Bta13083	-5.51826	0.000109068
Bta06135	-5.52359	0.000267463
Bta08665	-5.52749	0.000105925
Bta12831	-5.5389	5.00006e-05
Bta10506	-5.57744	0.000226429
Bta11224	-5.58164	8.91982e-05
Bta08139	-5.59608	5.27939e-05
Bta00175	-5.59781	0.000118808
Bta01011	-5.61036	8.22888e-05
Bta12659	-5.61183	4.00923e-05
Bta08771	-5.64869	3.05224e-05
Bta11903	-5.67548	6.00186e-05
Bta15494	-5.67948	0.000164886
Bta01765	-5.68042	3.3165e-05
Bta10671	-5.68184	5.20204e-05
Bta07656	-5.6881	8.93024e-05
Bta05107	-5.68985	2.78829e-05
Bta06251	-5.69957	2.61765e-05
Bta06512	-5.72055	8.05665e-05
Bta08376	-5.72103	4.58659e-05
Bta13754	-5.72791	0.000141738
Bta00018	-5.73121	7.78853e-05
Bta04759	-5.73121	7.78853e-05
Bta04235	-5.75932	0.000128462
Bta03731	-5.77307	6.81784e-05
Bta04045	-5.77307	6.81784e-05
Bta10638	-5.77307	6.81784e-05
Bta09020	-5.77662	2.09288e-05
Bta05419	-5.80368	6.18427e-05
Bta06867	-5.81375	5.98898e-05
Bta00237	-5.81833	1.83355e-05
Bta00814	-5.83366	5.62017e-05
Bta08024	-5.83366	5.62017e-05
Bta07579	-5.83497	0.000101292
Bta15708	-5.86416	9.23943e-05
Bta04959	-5.86855	1.54774e-05
Bta10978	-5.87269	4.96118e-05
Bta08702	-5.88076	1.61119e-05
Bta04306	-5.89265	1.37782e-05
Bta06360	-5.93522	1.34818e-05
Bta11239	-5.94217	1.31781e-05
Bta01890	-5.9787	1.16909e-05
Bta09110	-5.98573	1.19724e-05
Bta13365	-6.03547	8.58295e-06
Bta02325	-6.04135	8.94173e-06
Bta10257	-6.08879	1.39374e-05
Bta15655	-6.10386	8.32051e-06
Bta02816	-6.10642	6.88873e-06
Bta11434	-6.10977	1.63135e-05
Bta07860	-6.11542	4.162e-05
Bta01267	-6.13593	2.12717e-05
Bta07862	-6.14562	8.84722e-06
Bta13874	-6.14618	5.95982e-06
Bta15765	-6.17005	5.91753e-06
Bta02775	-6.25666	4.13373e-06
Bta11155	-6.25827	4.10822e-06
Bta00378	-6.28686	2.40197e-05
Bta15830	-6.29524	1.26867e-05
Bta04954	-6.32612	8.05317e-06
Bta06769	-6.36217	4.33851e-06
Bta03287	-6.36405	3.52712e-06
Bta02550	-6.38314	6.68068e-06
Bta04114	-6.39914	9.04232e-06
Bta13647	-6.40311	2.54171e-06
Bta06785	-6.43072	3.87842e-06
Bta09021	-6.45665	2.40152e-06
Bta11777	-6.47084	7.15308e-06
Bta11974	-6.48007	3.86131e-06
Bta05151	-6.50023	4.54729e-06
Bta04822	-6.50648	3.53904e-06
Bta10722	-6.57432	1.4363e-06
Bta08456	-6.58099	4.9853e-06
Bta02716	-6.6019	1.68627e-06
Bta04695	-6.63124	1.19039e-06
Bta01909	-6.63852	1.73773e-06
Bta02375	-6.65562	3.90096e-06
Bta05578	-6.65924	1.39345e-06
Bta00601	-6.68332	3.56098e-06
Bta03613	-6.68871	6.5244e-06
Bta08261	-6.68871	6.5244e-06
Bta04605	-6.71164	9.17896e-07
Bta10563	-6.71734	2.2212e-06
Bta02274	-6.74284	1.37903e-06
Bta00176	-6.75296	2.83075e-06
Bta15304	-6.75296	2.83075e-06
Bta07734	-6.76338	2.73509e-06
Bta03978	-6.77652	7.8146e-07
Bta06329	-6.79166	8.39727e-07
Bta09240	-6.8044	1.00072e-06
Bta14452	-6.8919	5.84564e-07
Bta05219	-6.89893	1.21651e-06
Bta04665	-6.91443	4.66373e-07
Bta04792	-6.91862	4.65687e-07
Bta00584	-6.95286	1.46164e-06
Bta14089	-7.03092	3.12786e-07
Bta01544	-7.05062	7.34376e-07
Bta06766	-7.07084	9.88137e-07
Bta14190	-7.11012	1.63333e-06
Bta00951	-7.13244	2.33109e-07
Bta04934	-7.14025	1.47844e-06
Bta05791	-7.15153	2.07492e-07
Bta00105	-7.1763	3.81676e-07
Bta12679	-7.18099	3.75731e-07
Bta12668	-7.29144	2.59567e-07
Bta03771	-7.35276	1.07198e-07
Bta07735	-7.39077	9.42771e-08
Bta15667	-7.39144	6.42688e-07
Bta02888	-7.401	1.24325e-07
Bta03202	-7.4064	6.11499e-07
Bta05518	-7.41043	8.94899e-08
Bta09036	-7.45205	2.77159e-07
Bta04236	-7.48553	7.09774e-08
Bta09146	-7.51383	6.45118e-08
Bta08712	-7.5243	2.17616e-07
Bta09285	-7.57194	6.33512e-08
Bta00864	-7.60423	4.61545e-08
Bta02872	-7.62337	8.51151e-08
Bta07853	-7.62361	7.77549e-08
Bta07236	-7.62909	4.18619e-08
Bta06706	-7.63539	8.17404e-08
Bta06199	-7.71721	4.00192e-08
Bta00980	-7.79341	2.93421e-08
Bta08493	-7.8423	3.97083e-08
Bta07919	-7.84374	1.41939e-07
Bta04260	-7.87991	1.25731e-07
Bta07872	-7.89132	2.926e-08
Bta13103	-7.9152	1.11697e-07
Bta02226	-7.92164	2.00515e-08
Bta15454	-7.93603	1.73101e-08
Bta04899	-7.96282	2.7092e-08
Bta14924	-8.0162	1.28009e-08
Bta15493	-8.02421	4.05542e-08
Bta07375	-8.02638	4.02593e-08
Bta10834	-8.05203	1.03188e-08
Bta11628	-8.07351	6.56362e-08
Bta07851	-8.11722	2.42027e-08
Bta03261	-8.21798	8.60022e-09
Bta10782	-8.24626	7.14788e-09
Bta13177	-8.26751	9.66569e-09
Bta08262	-8.28508	1.15769e-08
Bta08587	-8.33595	6.49675e-09
Bta00011	-8.3849	8.25695e-09
Bta15455	-8.45427	3.52919e-09
Bta09946	-8.53882	4.90102e-09
Bta07852	-8.67293	3.15408e-09
Bta10062	-8.76687	6.32421e-09
Bta14984	-8.77083	1.75256e-09
Bta07613	-8.80236	8.01547e-10
Bta08392	-8.87079	1.24779e-09
Bta04024	-8.88613	6.89703e-10
Bta12306	-9.0067	6.65509e-10
Bta09277	-9.12176	3.9888e-10
Bta03890	-9.12533	3.36267e-10
Bta13784	-9.17326	1.59472e-09
Bta04338	-9.17832	8.13342e-10
Bta11222	-9.20622	5.07721e-10
Bta08699	-9.2135	1.39107e-09
Bta07255	-9.21418	2.58599e-10
Bta10911	-9.25315	3.54693e-10
Bta05192	-9.46279	3.09005e-10
Bta02085	-9.47753	1.18685e-10
Bta00723	-9.48574	7.94925e-11
Bta02203	-9.67434	8.08867e-11
Bta08497	-9.72306	4.69491e-11
Bta02600	-9.7265	5.7288e-11
Bta12737	-9.84495	2.36364e-11
Bta11847	-9.8467	2.21759e-11
Bta10383	-9.85144	8.22236e-11
Bta00329	-9.99001	1.35207e-11
Bta07351	-10.0613	7.77518e-11
Bta02879	-10.1228	1.11954e-11
Bta02286	-10.2177	1.61527e-11
Bta03431	-10.2785	1.91605e-11
Bta12683	-10.3104	4.80505e-12
Bta05797	-10.358	1.46068e-11
Bta04625	-10.3642	2.76802e-11
Bta15648	-10.3783	5.48583e-12
Bta01772	-10.4933	9.20453e-12
Bta11845	-10.4952	3.68017e-12
Bta04135	-10.5376	3.59324e-12
Bta12832	-10.5418	4.18843e-12
Bta02307	-10.5547	1.44513e-11
Bta11280	-10.5725	1.36001e-11
Bta03335	-10.5856	3.60645e-12
Bta01569	-10.6897	9.1156e-12
Bta04635	-10.7859	3.38873e-12
Bta04550	-10.8493	2.72848e-12
Bta02667	-10.8799	4.76219e-12
Bta14008	-10.896	2.32669e-12
Bta14451	-10.9737	4.99045e-13
Bta13384	-10.9861	7.75935e-13
Bta02285	-11.1686	9.16378e-13
Bta07546	-11.1692	4.90719e-13
Bta05093	-11.1816	8.76743e-13
Bta09271	-11.1868	1.66911e-12
Bta09064	-11.3329	5.22582e-13
Bta11840	-11.3797	1.2379e-13
Bta12670	-11.3937	2.90656e-13
Bta14752	-11.4056	1.11022e-13
Bta00557	-11.7167	6.38378e-14
Bta08240	-11.8033	7.16094e-14
Bta08299	-11.8094	1.02474e-13
Bta12671	-11.8149	3.26406e-14
Bta03862	-11.9177	7.08322e-14
Bta11221	-12.078	4.08562e-14
Bta09888	-12.1345	2.29816e-14
Bta04376	-12.4529	1.13243e-14
Bta02458	-12.456	6.10623e-15
Bta04337	-12.4608	3.21965e-15
Bta04757	-12.5299	8.65974e-15
Bta13954	-12.5919	6.99441e-15
Bta15713	-12.6167	6.43929e-15
Bta00217	-12.638	3.21965e-15
Bta07519	-12.6492	2.44249e-15
Bta12753	-12.8188	6.21725e-15
Bta05739	-12.9178	2.33147e-15
Bta14897	-13.1687	9.99201e-16
Bta04551	-13.5927	0
Bta08567	-13.6078	0
Bta08612	-13.6604	3.33067e-16
Bta05892	-13.6825	3.33067e-16
Bta02920	-13.708	1.11022e-16
Bta04921	-13.8019	1.11022e-16
Bta06641	-13.8198	0
Bta00761	-13.8242	0
Bta11913	-13.9052	0
Bta06886	-14.1705	0
Bta08034	-14.392	0
Bta13211	-14.4527	0
Bta03435	-14.4656	0
Bta08713	-14.8649	0
Bta11979	-15.2018	0
Bta11978	-15.3013	0
Bta08784	-15.5468	0
Bta05737	-15.5702	0
Bta14024	-15.8192	0
Bta11629	-16.4666	0
Bta03434	-17.2563	0
Bta07722	-17.6599	0
